# Supplementary material for: Differential abundance analysis of mesocarp protein from high- and low-yielding oil palms associates non-oil biosynthetic enzymes to lipid biosynthesis
Source: PubMed Central journal article supplement (PMC4661986; doi:10.1186/s12953-015-0085-2), 2015-11-26
Supplement: 12953_2015_85_MOESM1_ESM.pdf [file 12953_2015_85_MOESM1_ESM.pdf]

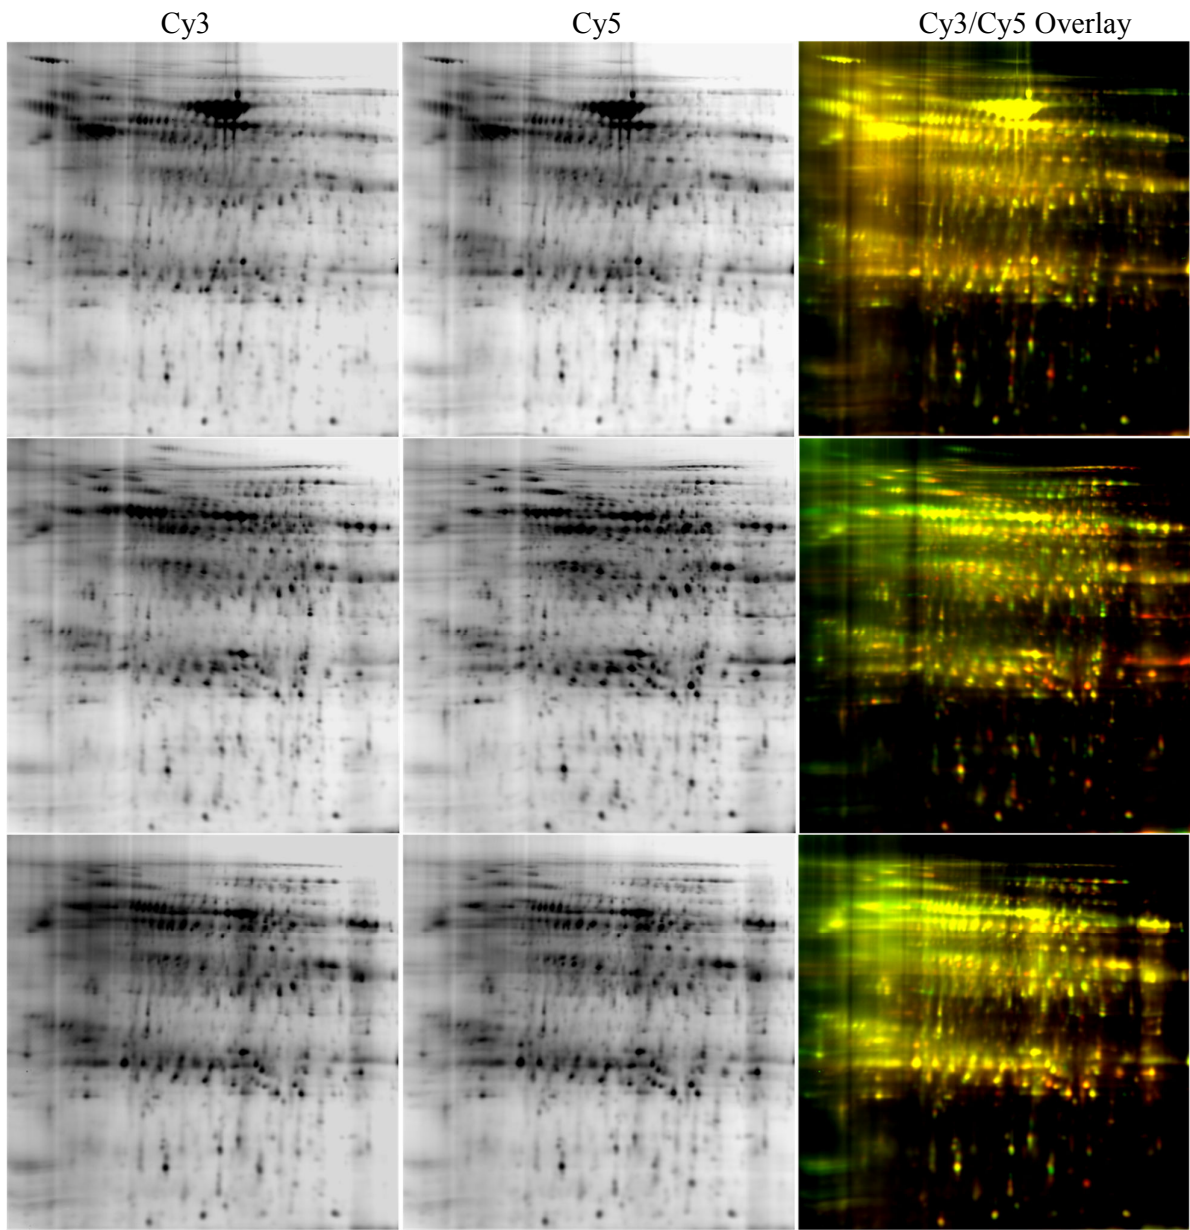

(A)

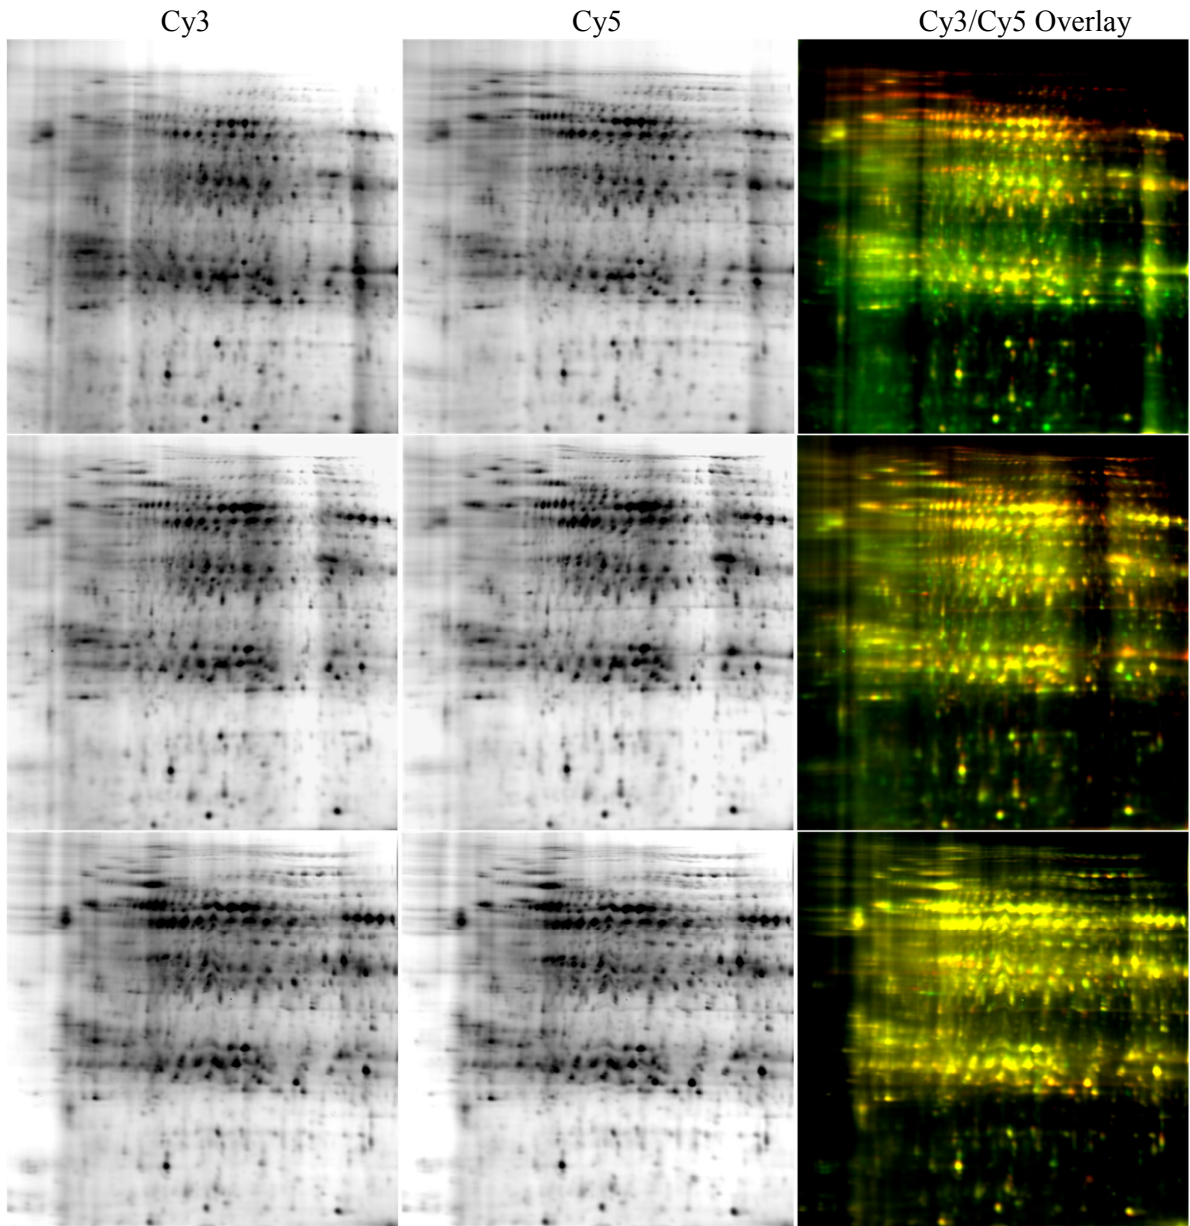

**(B)**

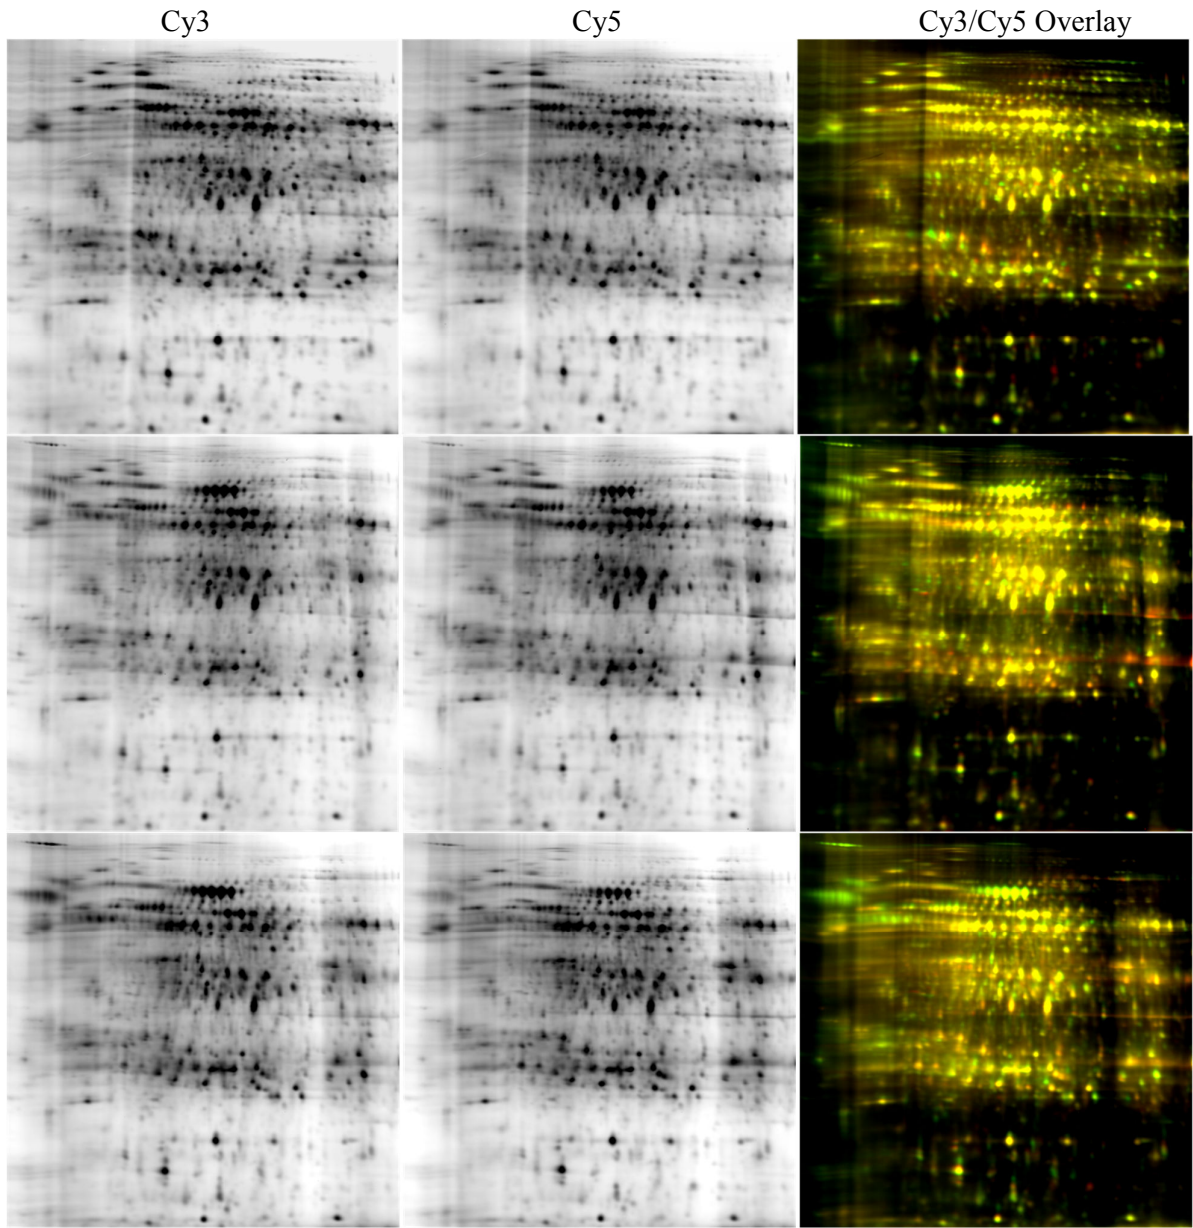

(C)



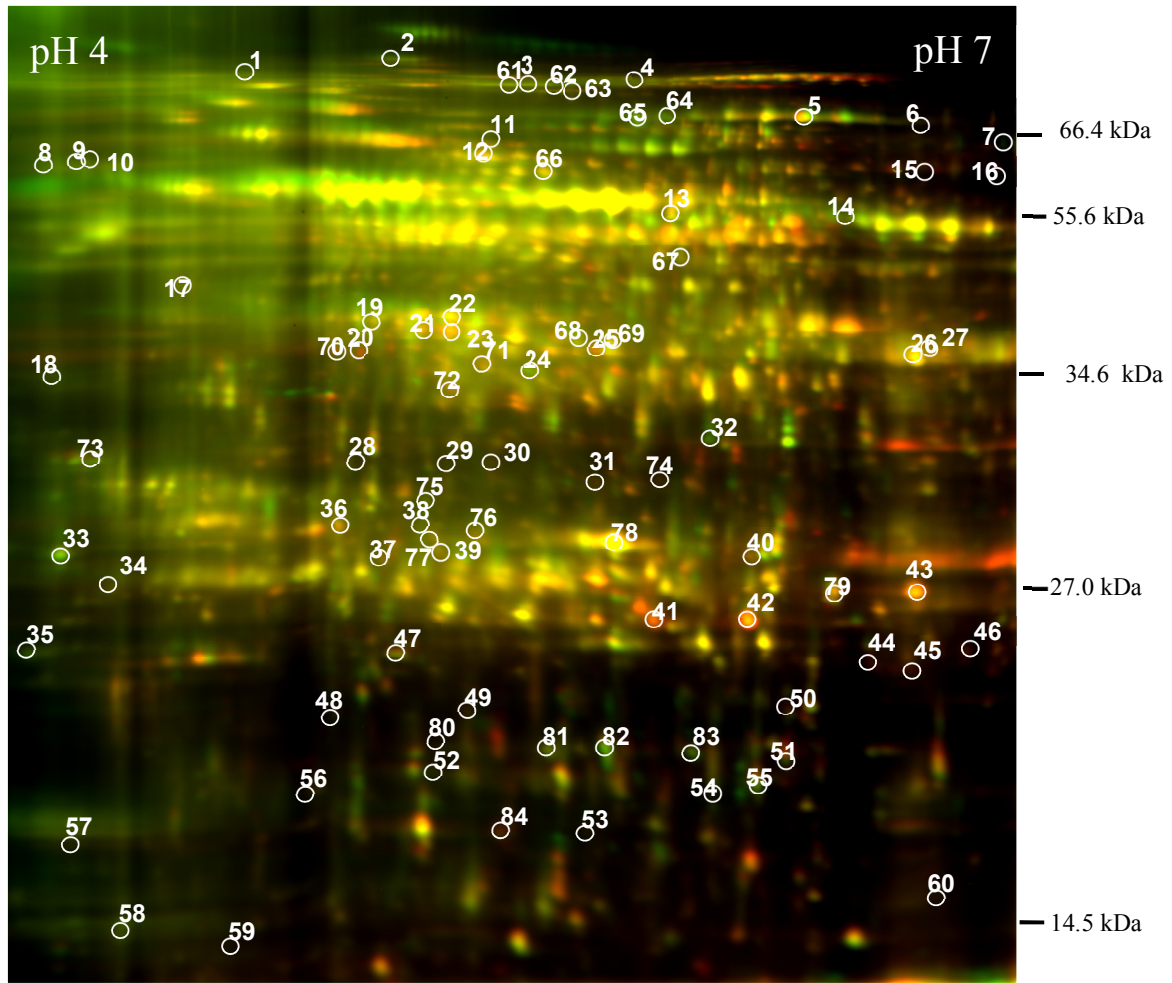

(D)

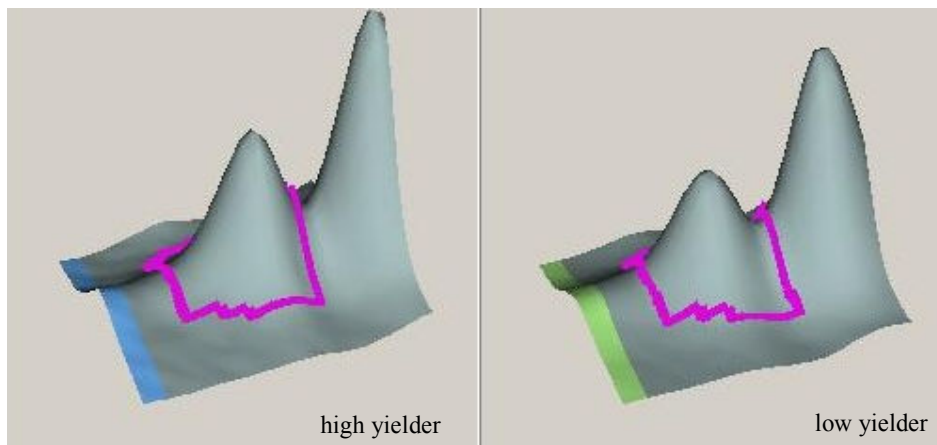

(E)

**Additional File 1.** Two dimensional DIGE gels produced for spot analysis using 13 cm IEF strips of pH 4 – 7 with 20-kVh focusing. Protein from high yielding palms was labeled with Cy3 whilst protein from low yielding palms with Cy5. Gels (A), (B) and (C) are from 3 biological replicates of 12, 16 and 18 WAP, respectively. Gel (D) is a composite of all DIGE gels. Numbers in Gel

(D) indicate the geographical position of protein spots in the map. Three-dimensional view (E) of a protein generated from a DIGE gel to verify that a spot is a true protein spot from an artifact. Illustrated here is the 3D view of protein Spot 80 (heat shock protein).
