# Supplementary material for: Differential abundance analysis of mesocarp protein from high- and low-yielding oil palms associates non-oil biosynthetic enzymes to lipid biosynthesis
Source: PubMed Central journal article supplement (PMC4661986; doi:10.1186/s12953-015-0085-2), 2015-11-26
Supplement: 12953_2015_85_MOESM2_ESM.pdf [file 12953_2015_85_MOESM2_ESM.pdf]

**Additional File 2.** Data of Biological Variation Analysis (BVA) on DIGE gels. Protein ratios are shown for 45 proteins found between low yielding (LY) palms and high yielding (HY) palms at 12, 16 and 18 week after pollination (WAP), and across time point among HY palms. Shown here are protein spots with differential ratio above 1.5 folds and with  $p < 0.1$ .

| Protein Spot ID | Master No. | Appearance | LY/HY at 12 WAP |          | LY/HY at 16 WAP |          | LY/HY at 18 WAP |          | 16/12 WAP of HY |          | 18/12 WAP of HY |          |
|-----------------|------------|------------|-----------------|----------|-----------------|----------|-----------------|----------|-----------------|----------|-----------------|----------|
|                 |            |            | P value         | Av.Ratio | P value         | Av.Ratio | P value         | Av.Ratio | P value         | Av.Ratio | P value         | Av.Ratio |
| 63              | 277        | 27 (27)    | 0.9900          | -1.02    | 0.0430          | 1.56     | 0.5100          | -1.13    | 0.0270          | -2.27    | 0.3300          | -1.35    |
| 67              | 686        | 27 (27)    | 0.3400          | -1.28    | 0.9000          | -1.01    | 0.3000          | -1.14    | 0.0360          | 1.79     | 0.0033          | 3.03     |
| 26              | 940        | 27 (27)    | 0.4500          | 1.17     | 0.0550          | 1.51     | 0.1600          | 1.20     | 0.0960          | -1.36    | 0.8300          | 1.03     |
| 37              | 1393       | 27 (27)    | 0.5600          | 1.13     | 0.0370          | 1.61     | 0.7100          | -1.07    | 0.4500          | -1.18    | 0.3100          | 1.25     |
| 74              | 1200       | 27 (27)    | 0.5400          | 1.14     | 0.1600          | -1.87    | 0.5900          | -1.03    | 0.0310          | 3.46     | 0.0120          | 2.14     |
| 13              | 573        | 27 (27)    | 0.9600          | 1.03     | 0.0360          | 1.88     | 0.6000          | -1.08    | 0.0080          | -2.28    | 0.0031          | -1.28    |
| 44              | 1631       | 27 (27)    | 0.0010          | 1.65     | 0.4400          | 1.10     | 0.1000          | 1.45     | 0.0110          | 1.51     | 0.8700          | -1.01    |
| 46              | 1613       | 27 (27)    | 0.0043          | 1.50     | 0.9400          | 1.01     | 0.1800          | 1.45     | 0.0120          | 1.72     | 0.4000          | -1.18    |
| 51              | 1831       | 27 (27)    | 0.1100          | -1.47    | 0.0280          | -1.88    | 0.3300          | -1.41    | 0.0220          | 1.87     | 0.0100          | 2.80     |
| 75              | 1254       | 27 (27)    | 0.6800          | -1.06    | 0.8700          | -1.03    | 0.4900          | 1.13     | 0.0420          | 2.57     | 0.0013          | 5.50     |
| 5               | 345        | 27 (27)    | 1.0000          | 1.05     | 0.0690          | 1.87     | 0.7000          | -1.07    | 0.2200          | -1.70    | 0.8800          | -1.09    |
| 21              | 862        | 27 (27)    | 0.2100          | 1.47     | 0.0630          | 1.77     | 0.3300          | 1.43     | 0.0200          | -1.80    | 0.0100          | -2.51    |
| 24              | 953        | 27 (27)    | 0.7700          | -1.06    | 0.1800          | -1.84    | 0.0130          | -3.36    | 0.0210          | 4.22     | 0.0040          | 6.63     |
| 30              | 1184       | 27 (27)    | 0.7900          | 1.01     | 0.1200          | -1.26    | 0.0720          | -2.01    | 0.3900          | 1.24     | 0.5800          | 1.18     |
| 65              | 336        | 27 (27)    | 0.1400          | -1.48    | 0.2200          | 1.35     | 0.1500          | 1.44     | 0.0085          | -3.12    | 0.0039          | -3.54    |
| 7               | 358        | 27 (27)    | 0.7400          | -1.22    | 0.0250          | 1.72     | 0.3900          | 1.25     | 0.1300          | -2.05    | 0.4600          | 1.17     |
| 41              | 1533       | 27 (27)    | 0.1600          | 2.39     | 0.0500          | 1.74     | 0.2300          | 1.45     | 0.0350          | 2.19     | 0.1500          | 1.79     |
| 43              | 1479       | 27 (27)    | 0.3500          | 2.10     | 0.0350          | 1.24     | 0.0980          | -1.52    | 0.0480          | 2.26     | 0.0310          | 2.69     |

|    |      |         |        |       |        |       |        |       |        |       |        |       |
|----|------|---------|--------|-------|--------|-------|--------|-------|--------|-------|--------|-------|
| 53 | 1895 | 24 (27) | 0.2200 | -1.12 | 0.0013 | -1.87 | 0.3000 | -1.16 | 0.0013 | 1.54  | 0.0330 | 1.26  |
| 54 | 1901 | 24 (27) | 0.3600 | -1.16 | 0.0300 | -2.08 | 0.8300 | 1.16  | 0.2000 | 1.32  | 0.2000 | -1.40 |
| 78 | 1367 | 27 (27) | 0.0440 | 1.17  | 0.1200 | 1.44  | 0.5100 | 1.25  | 0.0120 | -2.18 | 0.0140 | -3.87 |
| 80 | 1799 | 27 (27) | 0.7200 | -1.12 | 0.1100 | -1.56 | 0.6600 | -1.07 | 0.0028 | 4.00  | 0.0008 | 6.37  |
| 22 | 826  | 27 (27) | 0.6700 | 1.15  | 0.0860 | 1.64  | 0.5000 | -1.16 | 0.1200 | -1.60 | 0.3200 | 1.25  |
| 23 | 867  | 27 (27) | 0.0370 | 2.09  | 0.0340 | 3.33  | 0.5000 | 1.43  | 0.0470 | -2.05 | 0.0210 | -2.08 |
| 68 | 892  | 27 (27) | 0.6200 | -1.09 | 0.1600 | -1.22 | 0.8800 | -1.01 | 0.0059 | 2.17  | 0.0006 | 3.61  |
| 73 | 1144 | 27 (27) | 0.0044 | -1.47 | 0.4000 | 1.19  | 0.5000 | 1.23  | 0.0220 | -2.11 | 0.1700 | -1.17 |
| 9  | 416  | 21 (27) | 0.4800 | -1.70 | 0.9700 | 1.01  | 0.0790 | -2.16 | 0.2300 | -2.98 | 0.6900 | -1.54 |
| 12 | 460  | 21 (27) | 0.5900 | -1.17 | 0.0830 | 3.16  | 0.7100 | -1.06 | 0.0430 | -4.26 | 0.1900 | -1.41 |
| 19 | 840  | 24 (27) | 0.6600 | 1.15  | 0.0770 | 1.61  | 0.9100 | -1.02 | 0.8200 | 1.08  | 0.1300 | 1.45  |
| 20 | 902  | 27 (27) | 0.0990 | 1.56  | 0.0680 | 1.90  | 0.9700 | -1.12 | 0.2100 | -1.35 | 0.3600 | 1.62  |
| 32 | 1113 | 27 (27) | 0.0610 | -1.77 | 0.1700 | -1.34 | 0.6400 | 1.16  | 0.0940 | 1.54  | 0.0610 | 1.52  |
| 33 | 1373 | 27 (27) | 0.0110 | -1.57 | 0.5800 | 1.08  | 0.0180 | -1.54 | 0.0080 | -2.01 | 0.0003 | -1.62 |
| 34 | 1452 | 27 (27) | 0.9400 | 1.05  | 0.0270 | -1.63 | 0.9400 | 1.01  | 0.0280 | 1.58  | 0.0058 | -1.34 |
| 36 | 1317 | 27 (27) | 0.0090 | 1.65  | 0.6300 | 1.10  | 0.1000 | 1.11  | 0.0330 | 1.50  | 0.0120 | 1.41  |
| 39 | 1380 | 27 (27) | 0.0610 | 1.68  | 0.3800 | 1.17  | 0.2100 | 1.25  | 0.0960 | 1.77  | 0.1300 | 1.58  |
| 48 | 1751 | 27 (27) | 0.9000 | 1.02  | 0.0320 | -1.85 | 0.5800 | -1.14 | 0.0210 | 1.59  | 0.9400 | 1.01  |
| 49 | 1736 | 27 (27) | 0.9200 | 1.00  | 0.4100 | -1.74 | 0.0780 | 1.83  | 0.2500 | 2.08  | 0.0013 | -2.47 |
| 55 | 1879 | 27 (27) | 0.0900 | -1.60 | 0.3200 | -1.32 | 0.0014 | -1.39 | 0.1200 | -1.52 | 0.0200 | -1.70 |
| 56 | 1886 | 27 (27) | 0.4200 | -1.11 | 0.1900 | -1.22 | 0.0900 | -1.64 | 0.0001 | 2.73  | 0.0003 | 7.01  |
| 58 | 2130 | 24 (27) | 0.1500 | -1.23 | 0.0690 | -1.86 | 0.9100 | 1.10  | 0.4500 | 1.12  | 0.0220 | -1.33 |
| 59 | 2200 | 27 (27) | 0.7500 | -1.03 | 0.0500 | -1.83 | 0.7200 | -1.10 | 0.0130 | 2.53  | 0.0027 | 3.28  |
| 66 | 501  | 27 (27) | 0.8300 | -1.09 | 0.1300 | 1.65  | 0.4200 | 1.06  | 0.0300 | -2.56 | 0.2100 | -1.47 |
| 72 | 995  | 27 (27) | 0.2000 | 1.55  | 0.5300 | -1.12 | 0.4200 | 1.13  | 0.0100 | 2.70  | 0.0160 | 2.24  |
| 79 | 1469 | 27 (27) | 0.1600 | 1.49  | 0.5900 | -1.10 | 0.5500 | -1.07 | 0.0190 | 2.03  | 0.0650 | 1.49  |
| 84 | 1987 | 27 (27) | 0.4800 | 1.44  | 0.4900 | -1.22 | 0.7700 | -1.04 | 0.0190 | 2.34  | 0.0018 | 2.62  |
