# Supplementary material for: Differential abundance analysis of mesocarp protein from high- and low-yielding oil palms associates non-oil biosynthetic enzymes to lipid biosynthesis
Source: PubMed Central journal article supplement (PMC4661986; doi:10.1186/s12953-015-0085-2), 2015-11-26
Supplement: 12953_2015_85_MOESM5_ESM.pdf [file 12953_2015_85_MOESM5_ESM.pdf]

**Additional File 5.** Protocols for electrophoresis and immuno-blotting for western analysis, and antibodies used in this study.

**Protocols:**

For 1DE, the Laemmli buffer system [Laemmli, U. K., Nature 1970, 222, 680–685] was used to cast 4.75% stacking and 12.5% resolving gel. After denaturation at 95°C for 3 min, proteins (30 µg) were electrophoresed under 200 V in a Bio-Rad mini-Protean III system until bromophenol blue dye reached the bottom of the minigel. For 2DE, protein samples (30µg) were applied in 125 µL of 2D rehydration solution by reswelling 7 cm IPG strips (pH 3–10 NL, GE Healthcare) overnight. IEF was performed in Ettan IPGphor II system following the protocol provided by Amersham BioSciences [*2-D electrophoresis: principles and methods*, GE Healthcare 2004]. Focused IPG strips were equilibrated using dithiothreitol and iodoacetamide solutions as described by Amersham BioSciences [*2-D electrophoresis: principles and methods*, GE Healthcare 2004] and then eletrophoresised onto a 12.5% minigel (1 mm thick) as above. After electrophoresis, proteins were visualized with Coomassie stain or electro-blotted onto nitrocellulose membranes. The protein blots were washed with 1X PBS, and blocked with 4% non-fat milk prior to incubating them with respective antibodies at the titer recommended by the suppliers. An alkaline phosphatase labeled secondary antibody was used for chromogenic detection with NBT/BCIP. The 1DE, 2DE and blot images were acquired using Image Scanner III (GE Heathcare).

**List of Antibodies:**

| No. | Spot No. | 1° Antibody                                                   | Supplier of 1° Antibody | Host         | 1° Antibody Titer | 2° Antibody         | 2° Antibody Titer |
|-----|----------|---------------------------------------------------------------|-------------------------|--------------|-------------------|---------------------|-------------------|
| 1   | 9        | AS09501: Catalase                                             | Agrisera                | Rabbit (Pab) | 1:2000            | DC067 Anti-Rabbit   | 1:5000            |
| 2   | 22       | A0480-200ul: Anti-actin (plant), Clone 10-B3                  | Sigma                   | Mouse (Mab)  | 1:500             | SAB-101 Anti-Mouse  | 1:5000            |
| 3   | 37       | AB58329: Triosephosphate isomerase antibody                   | Abcam                   | Mouse (Mab)  | 1:500             | AB5931 Anti-Mouse   | 1:5000            |
| 4   | 56       | AS03037: RbcL, Rubisco large subunit, form I and form II      | Agrisera                | Rabbit (Pab) | 1:5000            | DC067 Anti-Rabbit   | 1:5000            |
| 5   | 74       | AS08294: ALD, fructose-1,6 biphosphate aldolase               | Agrisera                | Rabbit (Pab) | 1:5000            | DC067 Anti-Rabbit   | 1:5000            |
| 6   | 5        | AB9209: MTR antibody                                          | Abcam                   | goat         | 1:1000            | AB6742 Anti-Goat    | 1:5000            |
| 7   | 7        | AB19104: HSP 90 antibody                                      | Abcam                   | chicken      | 1:1000            | AB6754 Anti Chicken | 1:1000            |
| 8   | 13       | AS09503: V-ATPase B, vacuolar H <sup>+</sup> ATPase aubunit B | Agrisera                | Rabbit (Pab) | 1:1000            | DC067 Anti-Rabbit   | 1:5000            |
| 9   | 21       | AS07266: SMT1, sterol methyltransferase 1                     | Agrisera                | Rabbit (Pab) | 1:250             | DC067 Anti-Rabbit   | 1:5000            |
| 10  | 23       | AB51984: COMT                                                 | Abcam                   | Goat (Pab)   | 1:2000            | AB6742 Anti-Goat    | 1:5000            |

|    |    |                                                                                      |                       |              |        |                     |         |
|----|----|--------------------------------------------------------------------------------------|-----------------------|--------------|--------|---------------------|---------|
| 11 | 24 | GW22303B: Chicken Anti-XPNPEP (X-prolyl aminopeptidase (aminopeptidase P) 1) (N-193) | Sigma                 | chicken      | 1:500  | AB6754 Anti Chicken | 1:500   |
| 12 | 26 | 10494-1-AP: GAPDH                                                                    | Proteintech           | rabbit       | 1:500  | DC067 Anti-Rabbit   | 1:5000  |
| 13 | 43 | AB55188: glutathione s-transferase theta 1                                           | Abcam                 | Mouse        | 1:500  | SAB-101 Anti-Mouse  | 1:5000  |
| 14 | 49 | AB18180: ABCA1 antibody [AB.H10]                                                     | Abcam                 | Mouse (Mab)  | 1:100  | SAB-101 Anti-Mouse  | 1:5000  |
| 15 | 53 | AB61866: Prostaglandin D Synthase (Lipocalin) antibody                               | Abcam                 | Rabbit (Pab) | 1:500  | DC067 Anti-Rabbit   | 1:5000  |
| 16 | 54 | AS04055: GPX, chloroplastic glutathione peroxidase                                   | Agrisera              | Rabbit (Pab) | 1:1000 | DC067 Anti-Rabbit   | 1:10000 |
| 17 | 65 | M4697-50: Anti-MTR (5-Methyltetrahydrofolate-homocysteine Methyltransferase)         | USBiological          | Goat         | 1:250  | AB6742 Anti-Goat    | 1:5000  |
| 18 | 67 | GTX110062: MCCC1                                                                     | GeneTex               | rabbit       | 1:500  | DC067 Anti-Rabbit   | 1:5000  |
| 19 | 80 | AS07254: HSP17.6 cytosolic class I HSP 17.6                                          | Agrisera              | Rabbit (Pab) | 1:5000 | DC067 Anti-Rabbit   | 1:5000  |
| 20 | 30 | AB90146: HECT E3 ubiquitin ligase antibody                                           | Abcam                 | Rabbit (Pab) | 1:250  | DC067 Anti-Rabbit   | 1:5000  |
| 21 | 32 | AS07217: FtsZ, prokaryotic cell division GTPase                                      | Agrisera              | Rabbit (Pab) | 1:1000 | DC067 Anti-Rabbit   | 1:5000  |
| 22 | 33 | ABIN337196: Nascent-polypeptide-associated+Complex+Alpha+Polypeptide+(NACA) (Human)  | antibodies-online.com | rabbit       | 1:25   | DC067 Anti-Rabbit   | 1:5000  |
| 23 | 41 | AS09479: GST class-phi, glutathione S transferase                                    | Agrisera              | Rabbit (Pab) | 1:500  | DC067 Anti-Rabbit   | 1:5000  |
| 24 | 48 | SC-102147: U2 snRNP A (F-22)                                                         | Santa Cruz Biotech    | rabbit       | 1:100  | DC067 Anti-Rabbit   | 1:5000  |
| 25 | 51 | AS05093: PrxQ, peroxiredoxin, thioredoxin reductase                                  | Agrisera              | Rabbit (Pab) | 1:250  | DC067 Anti-Rabbit   | 1:5000  |
| 26 | 63 | AS09556: PLD, phospholipase D                                                        | Agrisera              | Rabbit (Pab) | 1:1000 | DC067 Anti-Rabbit   | 1:5000  |
| 27 | 68 | ABIN229498 0: actin, Gamma 2, Smooth muscle enteric ACTG2                            | antibodies-online.com | rabbit       | 1:250  | DC067 Anti-Rabbit   | 1:5000  |
| 28 | 72 | 17013-1-AP: RPL10                                                                    | Proteintech           | rabbit       | 1:1000 | DC067 Anti-Rabbit   | 1:5000  |
