# Supplementary material for: Differential abundance analysis of mesocarp protein from high- and low-yielding oil palms associates non-oil biosynthetic enzymes to lipid biosynthesis
Source: PubMed Central journal article supplement (PMC4661986; doi:10.1186/s12953-015-0085-2), 2015-11-26
Supplement: 12953_2015_85_MOESM6_ESM.pdf [file 12953_2015_85_MOESM6_ESM.pdf]

**Additional File 6.** Analysis of dot intensity of immunoblots for comparison of protein levels in mesocarp of high yielding and low yielding oil palms at 12, 16 and 18 week after pollination.

| original<br>Spot# | H or L | week | 12_XPNPEP (chicken)<br>24 | 13_MTR (Goat)<br>5 | 15_Anti MTR (Goat)<br>65 | 41_COMT<br>23 | 47_L_ACTIN<br>22 | 48_TIM<br>37 | 51_ALD<br>74 | 53_L_ABCA1<br>49 |
|-------------------|--------|------|---------------------------|--------------------|--------------------------|---------------|------------------|--------------|--------------|------------------|
| H2W12             | H      | 12   | 186.3834519               | 149.2573789        | 198.3986331              | 75.58406068   | 101.0944811      | 87.0752424   | 58.68839938  | 247.1525766      |
| H3W12             | H      | 12   | 34.7812528                | 45.43009408        | 53.618348                | 6.67085328    | 37.59761264      | 28.6041392   | 20.59257872  | 99.13297184      |
| H4W12             | H      | 12   | 102.9805977               | 110.1083817        | 94.36788349              | 0             | 82.40666919      | 29.59890946  | 65.13398483  | 162.339294       |
| H5W12             | H      | 12   | 91.19115435               | 63.49150869        | 102.1191296              | 26.61763322   | 59.04085282      | 59.47098275  | 44.63786932  | 228.8714776      |
| H6W12             | H      | 12   | 88.44816469               | 74.24800406        | 92.83224844              | 14.986554     | 33.46956638      | 27.90338813  | 26.78588175  | 131.4080993      |
| H7W12             | H      | 12   | 97.58579388               | 72.09859505        | 169.900713               | 47.01018248   | 63.9742697       | 92.2491943   | 68.78978858  | 143.2811011      |
| H8W12             | H      | 12   | 193.8452448               | 158.5224219        | 358.7940711              | 187.8205536   | 187.6942002      | 166.8028485  | 132.6655326  | 374.2122063      |
| H9W12             | H      | 12   | 39.40141382               | 60.80953692        | 48.38186685              | 16.35150001   | 62.70891599      | 30.40480569  | 25.7024038   | 126.382746       |
| L1W12             | L      | 12   | 202.6025373               | 178.5264254        | 182.3604291              | 60.59658585   | 99.79808865      | 124.7202762  | 83.7045783   | 328.0965933      |
| L3W12             | L      | 12   | 160.0700672               | 104.6650268        | 257.363208               | 55.0287784    | 110.859858       | 96.9731924   | 87.0184228   | 305.9105592      |
| L4W12             | L      | 12   | 222.5765826               | 112.5808617        | 186.7234968              | 61.57633671   | 98.99421968      | 148.4457434  | 79.80564051  | 442.8826795      |
| L5W12             | L      | 12   | 138.3639753               | 83.16586624        | 193.4601677              | 108.9458324   | 105.4876453      | 128.032158   | 97.48348185  | 273.1774424      |
| L6W12             | L      | 12   | 225.1174151               | 135.3696189        | 283.6740731              | 85.47425129   | 145.0707453      | 129.2619625  | 90.55311691  | 301.7495093      |
| L7W12             | L      | 12   | 54.44359986               | 157.0079262        | 137.2773052              | 70.42267918   | 127.7182036      | 101.0348401  | 82.153352    | 314.831865       |
| L8W12             | L      | 12   | 120.0613809               | 140.9649326        | 265.1938548              | 89.56228549   | 112.5652028      | 244.2727279  | 121.0364311  | 373.9190083      |
| L9W12             | L      | 12   | 72.4164861                | 99.59413999        | 110.4490601              | 50.10986485   | 58.65621003      | 50.89427967  | 55.11382721  | 144.1161012      |
| Mean HW12         |        |      | 104.3271342               | 91.74574016        | 139.8016117              | 46.88016716   | 78.498321        | 65.2636888   | 55.37455487  | 189.0975591      |
| Mean LW12         |        |      | 149.4565055               | 126.4843497        | 202.0626993              | 72.71457676   | 107.3937717      | 127.9543975  | 87.10860633  | 310.5854698      |
| Median HW12       |        |      | 94.38847411               | 73.17329956        | 98.24350655              | 21.48456661   | 63.34159285      | 44.93789422  | 51.66313435  | 152.8101976      |
| Median LW12       |        |      | 149.2170212               | 123.9752403        | 190.0918322              | 65.99950794   | 108.1737516      | 126.3762171  | 85.36150055  | 310.3712121      |
| T-test            |        |      | 0.084631919               | 0.044110029        | 0.084469502              | 0.146447412   | 0.084377579      | 0.01569797   | 0.025816032  | 0.007677895      |

| original<br>Spot# | H or L | week | 54_L_V-ATPase<br>13 | 55_SMT1<br>21 | 56_GAPDH<br>26 | 57_lipocalin<br>53 | 58_L_GPX<br>54 | 60_HSP17.6<br>80 | 63_ACTG2<br>68 | 68_PrxQ<br>51 |
|-------------------|--------|------|---------------------|---------------|----------------|--------------------|----------------|------------------|----------------|---------------|
| H2W12             | H      | 12   | 143.8858879         | 83.54515675   | 166.7209481    | 334.3940602        | 82.46401648    | 75.94197171      | 195.0746498    | 191.8985043   |
| H3W12             | H      | 12   | 90.18216088         | 64.83957424   | 40.4361188     | 147.9456479        | 80.5245364     | 17.61356072      | 83.20785928    | 64.57827152   |
| H4W12             | H      | 12   | 136.8947526         | 171.1918429   | 94.66482511    | 305.2922037        | 117.8586394    | 25.03323764      | 124.3853555    | 112.6381258   |
| H5W12             | H      | 12   | 134.8957309         | 80.50924058   | 82.6706647     | 175.3464679        | 155.3159689    | 9.512590906      | 145.0647688    | 109.0113991   |
| H6W12             | H      | 12   | 91.294392           | 137.3619381   | 104.2337002    | 164.7527733        | 86.4995805     | 23.98730466      | 176.8643648    | 126.052821    |
| H7W12             | H      | 12   | 163.9418669         | 140.4017245   | 196.9495448    | 184.0453814        | 117.874779     | 33.60921541      | 199.0720671    | 178.5395426   |
| H8W12             | H      | 12   | 276.067077          | 380.5472436   | 376.5408089    | 490.8516224        | 288.9563823    | 102.9660653      | 444.4388975    | 387.7576935   |
| H9W12             | H      | 12   | 72.99800718         | 39.41220871   | 78.8243802     | 156.4980626        | 31.6671375     | 11.03412454      | 101.6657666    | 70.90312897   |
| L1W12             | L      | 12   | 184.6554629         | 191.8700111   | 227.422097     | 300.9558731        | 299.9876642    | 65.95211198      | 244.1587537    | 172.3667874   |
| L3W12             | L      | 12   | 202.759547          | 186.3479036   | 270.8239182    | 346.8513006        | 147.0548378    | 26.5651866       | 266.281623     | 254.132718    |
| L4W12             | L      | 12   | 186.6850373         | 144.7863173   | 98.04962772    | 252.4729333        | 160.8280998    | 43.15430543      | 225.6722516    | 162.4515077   |
| L5W12             | L      | 12   | 130.3324063         | 186.0573269   | 191.2582013    | 242.0526683        | 150.1389816    | 56.42016366      | 258.8668781    | 221.0695447   |
| L6W12             | L      | 12   | 245.7176886         | 336.0327398   | 229.3577255    | 265.5273355        | 491.997859     | 39.44740138      | 374.9704795    | 255.4128979   |
| L7W12             | L      | 12   | 163.5235123         | 78.33549523   | 85.29964342    | 305.4949938        | 73.03913516    | 49.68642417      | 162.9094118    | 123.7884089   |
| L8W12             | L      | 12   | 258.3178819         | 175.1718922   | 252.5839232    | 620.6377533        | 142.8723328    | 12.92702709      | 385.4769055    | 382.2781022   |
| L9W12             | L      | 12   | 121.8276607         | 100.628877    | 74.38156932    | 236.1027661        | 45.99718979    | 32.31718946      | 145.2861956    | 120.3944042   |
| Mean HW12         |        |      | 138.7699844         | 137.2261162   | 142.6301238    | 244.8907774        | 120.14513      | 37.46225886      | 183.7217162    | 155.1724358   |
| Mean LW12         |        |      | 186.7273996         | 174.9038204   | 178.6470882    | 321.261953         | 188.9895125    | 40.80872622      | 257.9528123    | 211.4867964   |
| Median HW12       |        |      | 135.8952417         | 110.4535474   | 99.44926263    | 179.6959247        | 102.17911      | 24.51027115      | 160.9645668    | 119.3454734   |
| Median LW12       |        |      | 185.6702501         | 180.6146096   | 209.3401491    | 283.2416043        | 148.5969097    | 41.3008534       | 251.5128159    | 196.718166    |
| T-test            |        |      | 0.057624478         | 0.218573689   | 0.229989837    | 0.119879855        | 0.128937771    | 0.403636008      | 0.082862125    | 0.13044785    |

| original<br>Spot# | H or L | week | 75_HECT<br>30 | 76_FtsZ<br>32 | 77_NACA<br>33 | 78_GST phi<br>41 | 79_U2-SnRNP<br>48 | 80_PLD<br>63 | 81_RPL10<br>72 | 83_Catalase<br>9 | 84_Rbcl<br>56 | 85_MCCC1<br>67 |
|-------------------|--------|------|---------------|---------------|---------------|------------------|-------------------|--------------|----------------|------------------|---------------|----------------|
| H2W12             | H      | 12   | 128.303738    | 166.5475289   | 52.36894433   | 248.4398193      | 45.1754441        | 78.04094775  | 34.34090351    | 268.7701131      | 78.64589148   | 0.26177065     |
| H3W12             | H      | 12   | 60.70783432   | 47.7215424    | 38.00046096   | 134.8919628      | 17.50974736       | 68.86161632  | 23.54281048    | 20.65782488      | 46.09663072   | 2.82152864     |
| H4W12             | H      | 12   | 26.17093364   | 84.42756096   | 23.32973046   | 209.2459223      | 18.64947429       | 110.9706901  | 8.627157656    | 142.3299915      | 90.26728935   | 0              |
| H5W12             | H      | 12   | 107.1576049   | 75.92472641   | 48.44025187   | 178.7771044      | 22.51250374       | 103.4320237  | 14.20750368    | 176.2002525      | 105.8013475   | 28.67401945    |
| H6W12             | H      | 12   | 47.05119684   | 74.73518306   | 30.94074356   | 176.9151127      | 28.56561413       | 117.4627322  | 24.18792328    | 212.0619931      | 86.95486088   | 22.15662675    |
| H7W12             | H      | 12   | 57.74781709   | 142.0846025   | 39.32074403   | 132.9422528      | 36.33992175       | 142.7134254  | 15.15842506    | 261.0885062      | 83.49870458   | 9.210003425    |
| H8W12             | H      | 12   | 270.2307833   | 314.0717634   | 74.415105     | 281.7699698      | 94.0406574        | 276.2072739  | 14.70670515    | 513.1701131      | 269.8236585   | 17.2724091     |
| H9W12             | H      | 12   | 32.46912319   | 41.04134335   | 12.65957403   | 111.7323342      | 12.97605036       | 33.32687006  | 8.784469986    | 23.19192242      | 37.43056516   | 0              |
| L1W12             | L      | 12   | 94.11741038   | 111.7487276   | 72.1071867    | 269.6439179      | 69.64358205       | 141.1502126  | 39.81431708    | 370.7939738      | 207.2321528   | 31.4114514     |
| L3W12             | L      | 12   | 115.611737    | 170.0250044   | 82.1643916    | 308.254529       | 40.8635616        | 143.7191788  | 30.1397594     | 168.114113       | 99.1310424    | 40.1713736     |
| L4W12             | L      | 12   | 182.1499515   | 158.118365    | 99.74141495   | 220.0212387      | 15.36216772       | 150.8409214  | 56.62593763    | 307.4069608      | 119.9799503   | 12.45657215    |
| L5W12             | L      | 12   | 121.7321541   | 166.4052986   | 56.5603899    | 131.2489291      | 44.07262136       | 173.3587465  | 21.53763156    | 269.8552653      | 110.5401517   | 0              |
| L6W12             | L      | 12   | 132.7683521   | 241.7206706   | 82.19143034   | 289.0528383      | 65.45977321       | 241.7875341  | 32.29635858    | 424.4177235      | 200.8345203   | 13.5920306     |
| L7W12             | L      | 12   | 140.6284007   | 108.7697771   | 32.46973251   | 197.3242219      | 26.52019333       | 90.92701821  | 22.95818582    | 191.7389173      | 133.6883104   | 0              |
| L8W12             | L      | 12   | 102.2556372   | 152.4986949   | 122.1302993   | 436.2401632      | 12.04195676       | 110.8480351  | 49.48980107    | 48.91551407      | 93.85508081   | 0              |
| L9W12             | L      | 12   | 44.73306268   | 100.4463144   | 35.39232216   | 184.0355327      | 35.81452507       | 109.5368946  | 13.77381721    | 48.78580068      | 57.26131115   | 0.591601992    |
| Mean HW12         |        |      | 91.22987891   | 118.3192814   | 39.93444428   | 184.3393098      | 34.47117664       | 116.3769474  | 17.94448735    | 202.1838396      | 99.81486852   | 10.04954475    |
| Mean LW12         |        |      | 116.7495882   | 151.2166066   | 72.84464593   | 254.4776714      | 38.72229764       | 145.2710677  | 33.32947604    | 228.7535336      | 127.815315    | 12.27787872    |
| Median HW12       |        |      | 59.2278257    | 80.17614368   | 38.66060249   | 177.8461085      | 25.53905893       | 107.2013569  | 14.93256511    | 194.1311228      | 85.22678273   | 6.015766033    |
| Median LW12       |        |      | 118.6719456   | 155.3085299   | 77.13578915   | 244.8325783      | 38.33904334       | 142.4346957  | 31.21805899    | 230.7970913      | 115.260051    | 6.524087073    |
| T-test            |        |      | 0.2198104     | 0.18948313    | 0.012399523   | 0.05011231       | 0.36351961        | 0.182264512  | 0.012941381    | 0.363223013      | 0.195505016   | 0.37519975     |

| original<br>Spot# | H or L | week | 12_XPNPEP (chicken)<br>24 | 13_MTR (Goat)<br>5 | 15_Anti MTR (Goat)<br>65 | 41_COMT<br>23 | 47_L_ACTIN<br>22 | 48_TIM<br>37 | 51_ALD<br>74 | 53_L_ABCA1<br>49 |
|-------------------|--------|------|---------------------------|--------------------|--------------------------|---------------|------------------|--------------|--------------|------------------|
| H2W16             | H      | 16   | 345.7682685               | 352.9520037        | 229.9578685              | 101.4742244   | 106.4645301      | 110.5816078  | 220.0007821  | 304.016059       |
| H3W16             | H      | 16   | 121.961944                | 89.65175803        | 140.5605812              | 34.57684425   | 47.68071963      | 55.01264579  | 82.75657021  | 194.6733597      |
| H4W16             | H      | 16   | 356.4755102               | 177.0378146        | 200.5694668              | 0             | 126.531695       | 49.64953397  | 197.7346008  | 359.3538746      |
| H5W16             | H      | 16   | 296.8275657               | 115.3765807        | 246.0181785              | 52.31238853   | 47.12765633      | 106.6407974  | 190.3857164  | 262.2429787      |
| H6W16             | H      | 16   | 478.4295847               | 240.0235721        | 385.9712519              | 28.40444228   | 150.2715206      | 95.78728912  | 218.6304148  | 558.6203492      |
| H7W16             | H      | 16   | 238.5105008               | 70.26186225        | 183.4327794              | 92.33571075   | 121.4975128      | 113.2950846  | 118.9975569  | 282.0054623      |
| H8W16             | H      | 16   | 50.74442078               | 98.94554797        | 72.7414275               | 71.75050281   | 76.53837672      | 72.26861438  | 69.23182422  | 194.9244756      |
| H9W16             | H      | 16   | 264.0959005               | 183.7812376        | 230.4884977              | 74.69194584   | 165.0267269      | 133.6396682  | 193.126268   | 320.0927834      |
| L1W16             | L      | 16   | 406.2749774               | 176.9842767        | 263.5962937              | 134.2884543   | 127.8455228      | 215.3070761  | 183.520873   | 516.7381841      |
| L3W16             | L      | 16   | 368.8700445               | 190.8734411        | 430.6235089              | 84.9998283    | 211.003393       | 171.8225408  | 137.8059521  | 617.0955692      |
| L4W16             | L      | 16   | 407.7981073               | 178.6270168        | 267.6137672              | 85.3027032    | 152.7867872      | 182.557028   | 139.4077784  | 489.2554141      |
| L5W16             | L      | 16   | 276.4129046               | 121.5367136        | 218.8132467              | 130.9345447   | 101.5163507      | 145.4190364  | 156.1780123  | 238.0859687      |
| L6W16             | L      | 16   | 226.9763158               | 148.510674         | 343.4926088              | 71.403903     | 105.398122       | 96.354455    | 102.9167388  | 367.8523913      |
| L7W16             | L      | 16   | 55.78181472               | 139.2402327        | 132.4181061              | 62.34166033   | 120.5174162      | 80.33109224  | 150.9752219  | 249.4394577      |
| L8W16             | L      | 16   | 85.6524093                | 84.1010136         | 168.6859841              | 54.3204796    | 67.3700649       | 124.0393345  | 85.1684524   | 243.9148084      |
| L9W16             | L      | 16   | 300.4793983               | 281.822153         | 369.6829194              | 25.604216     | 171.569353       | 132.5487547  | 221.5816826  | 383.9573958      |
| Mean HW16         |        |      | 269.1017119               | 166.0037971        | 211.2175064              | 56.94325736   | 105.1423423      | 92.10940516  | 161.3579667  | 309.4911678      |
| Mean LW16         |        |      | 266.0307465               | 165.2119402        | 274.3658043              | 81.14947368   | 132.2508762      | 143.5474147  | 147.1943389  | 388.2923987      |
| Median HW16       |        |      | 280.4617331               | 146.2071976        | 215.2636676              | 62.03144567   | 113.9810214      | 101.2140433  | 191.7559922  | 293.0107606      |
| Median LW16       |        |      | 288.4461515               | 162.7474754        | 265.6050304              | 78.20186565   | 124.1814695      | 138.9838955  | 145.1915002  | 375.9048935      |
| T-test            |        |      | 0.482286052               | 0.492152732        | 0.105986721              | 0.098873615   | 0.122875021      | 0.009757667  | 0.301029744  | 0.12292352       |

| original<br>Spot# | H or L | week | 54_L_V-ATPase<br>13 | 55_SMT1<br>21 | 56_GAPDH<br>26 | 57_lipocalin<br>53 | 58_L_GPX<br>54 | 60_HSP17.6<br>80 | 63_ACTG2<br>68 | 68_PrxQ<br>51 |
|-------------------|--------|------|---------------------|---------------|----------------|--------------------|----------------|------------------|----------------|---------------|
| H2W16             | H      | 16   | 132.6018009         | 179.0566214   | 101.5211664    | 421.0777045        | 122.1860864    | 88.75921829      | 197.870842     | 220.4594102   |
| H3W16             | H      | 16   | 138.6439864         | 207.4224283   | 251.1901827    | 309.6608579        | 146.9685781    | 26.69821896      | 204.2935913    | 170.2917341   |
| H4W16             | H      | 16   | 184.0753036         | 199.2266762   | 265.0093873    | 439.1006298        | 146.1013814    | 31.68221346      | 315.0697118    | 199.9105548   |
| H5W16             | H      | 16   | 143.2192588         | 188.9004686   | 142.0963089    | 329.6837561        | 150.1423625    | 23.29807586      | 273.918601     | 214.9392523   |
| H6W16             | H      | 16   | 228.1596087         | 382.2641558   | 339.5184806    | 522.8521218        | 178.6487535    | 69.85209309      | 582.3561248    | 283.6457015   |
| H7W16             | H      | 16   | 154.2650458         | 168.207513    | 175.5208       | 196.8973604        | 138.4859033    | 47.19144534      | 224.2214326    | 207.3118001   |
| H8W16             | H      | 16   | 94.79997172         | 81.13146734   | 46.57846023    | 200.9714324        | 29.294585      | 45.55035664      | 132.5013912    | 97.22181422   |
| H9W16             | H      | 16   | 156.0894618         | 176.880298    | 250.8472315    | 504.8360739        | 86.76493482    | 37.55759917      | 387.8327877    | 323.4108906   |
| L1W16             | L      | 16   | 177.4719887         | 319.1875368   | 452.829486     | 360.8810374        | 133.7668811    | 63.33496744      | 444.8352154    | 325.308786    |
| L3W16             | L      | 16   | 334.2698705         | 364.2798182   | 256.0278051    | 523.0038441        | 315.3860047    | 36.50059349      | 405.1433699    | 413.3734518   |
| L4W16             | L      | 16   | 217.373272          | 202.6417      | 147.4407716    | 350.5861804        | 212.8433952    | 57.4965924       | 319.092122     | 240.2882016   |
| L5W16             | L      | 16   | 132.2957719         | 196.1650175   | 246.1543767    | 281.4602634        | 144.2049645    | 66.46448392      | 365.5734226    | 288.0238319   |
| L6W16             | L      | 16   | 165.9484643         | 332.3668703   | 394.7284936    | 313.7161359        | 99.851649      | 32.39053963      | 447.7499301    | 281.4169108   |
| L7W16             | L      | 16   | 144.347248          | 86.44196946   | 35.29303852    | 282.969648         | 67.62262474    | 23.54551996      | 186.8457591    | 137.9110775   |
| L8W16             | L      | 16   | 174.7825539         | 209.7910034   | 103.890631     | 291.0170052        | 147.7552795    | 9.44299835       | 204.2873373    | 165.7948492   |
| L9W16             | L      | 16   | 182.3035615         | 189.5783027   | 229.1982123    | 788.9769684        | 75.59559721    | 65.11796644      | 289.8724549    | 406.3582497   |
| Mean HW16         |        |      | 153.9818047         | 197.8862036   | 196.5352522    | 365.6349921        | 124.8240731    | 46.3236526       | 289.7580603    | 214.6488947   |
| Mean LW16         |        |      | 191.0990913         | 237.5565273   | 233.1953519    | 399.0763853        | 149.6282995    | 44.2867077       | 332.9249514    | 282.3094198   |
| Median HW16       |        |      | 148.7421523         | 183.978545    | 213.1840158    | 375.3807303        | 142.2936423    | 41.5539779       | 249.0700168    | 211.1255262   |
| Median LW16       |        |      | 176.1272713         | 206.2163517   | 237.6762945    | 332.1511581        | 138.9859228    | 46.99859294      | 342.3327723    | 284.7203713   |
| T-test            |        |      | 0.092073786         | 0.193042622   | 0.277382963    | 0.33521369         | 0.235164239    | 0.428373456      | 0.248220866    | 0.070227135   |

| original<br>Spot# | H or L | week | 75_HECT<br>30 | 76_FtsZ<br>32 | 77_NACA<br>33 | 78_GST phi<br>41 | 79_U2-SnRNP<br>48 | 80_PLD<br>63 | 81_RPL10<br>72 | 83_Catalase<br>9 | 84_RbcL<br>56 | 85_MCCC1<br>67 |
|-------------------|--------|------|---------------|---------------|---------------|------------------|-------------------|--------------|----------------|------------------|---------------|----------------|
| H2W16             | H      | 16   | 210.1532269   | 205.9253231   | 99.90496085   | 391.5711896      | 60.86890893       | 325.5571206  | 45.05767734    | 155.6390693      | 216.1014718   | 0              |
| H3W16             | H      | 16   | 52.50873099   | 135.1484409   | 66.96585705   | 283.2002405      | 32.71829144       | 129.3490662  | 29.02300548    | 122.0910509      | 81.11086698   | 25.70667456    |
| H4W16             | H      | 16   | 65.39122478   | 202.4841724   | 84.36570259   | 382.9227193      | 55.82940785       | 204.4117474  | 66.88973481    | 243.7409434      | 170.6528029   | 19.80159254    |
| H5W16             | H      | 16   | 93.75830826   | 212.2958222   | 86.3929247    | 175.7835244      | 45.5351558        | 136.8488907  | 26.76859591    | 330.3777869      | 110.8185261   | 25.63686082    |
| H6W16             | H      | 16   | 264.8805114   | 221.006347    | 133.1139481   | 511.1897865      | 95.24763751       | 269.7930155  | 66.72581142    | 710.4401851      | 301.356879    | 102.2163643    |
| H7W16             | H      | 16   | 60.95847009   | 149.6452813   | 39.44159531   | 185.0339718      | 32.42442506       | 128.1478489  | 24.55726191    | 314.1117578      | 87.51519581   | 0              |
| H8W16             | H      | 16   | 96.29887992   | 82.95622516   | 39.20810531   | 207.0035091      | 20.69403563       | 58.81446563  | 13.56145477    | 166.1127463      | 85.64413188   | 0              |
| H9W16             | H      | 16   | 41.60947231   | 145.0109238   | 70.30012399   | 386.0573589      | 22.57513403       | 129.0064001  | 35.59159131    | 72.93515938      | 72.92582859   | 0              |
| L1W16             | L      | 16   | 118.5436325   | 271.1686634   | 111.2351897   | 353.8496292      | 43.5598317        | 275.245127   | 45.83577529    | 443.6017356      | 307.0247763   | 9.17532        |
| L3W16             | L      | 16   | 253.671607    | 325.5225341   | 184.7934791   | 522.0812434      | 58.5632905        | 243.4181996  | 73.66299771    | 388.0429995      | 188.778148    | 64.11523033    |
| L4W16             | L      | 16   | 159.4307604   | 223.514412    | 122.8067208   | 260.095786       | 22.8569808        | 185.7372072  | 52.9858196     | 366.125374       | 163.2799776   | 7.9561792      |
| L5W16             | L      | 16   | 157.7501674   | 200.8136728   | 43.74416018   | 191.5513794      | 35.82315463       | 153.4394088  | 9.302171981    | 314.3579455      | 145.0967121   | 0              |
| L6W16             | L      | 16   | 186.5064609   | 249.1609465   | 80.13478      | 338.2340791      | 78.1606715        | 269.438315   | 56.64664738    | 469.8732641      | 248.612555    | 41.0849665     |
| L7W16             | L      | 16   | 130.4333004   | 96.61559284   | 57.95064521   | 225.3012577      | 14.60744711       | 112.9886342  | 10.32768218    | 108.953296       | 74.9718716    | 0              |
| L8W16             | L      | 16   | 70.85032145   | 85.4184592    | 64.5292233    | 220.4743487      | 26.0334841        | 83.3478084   | 14.31189405    | 47.66630445      | 32.0307279    | 0              |
| L9W16             | L      | 16   | 43.05134082   | 235.1102094   | 123.9955353   | 421.903329       | 82.7701644        | 238.2452138  | 46.51332819    | 176.6730281      | 176.003469    | 17.00594981    |
| Mean HW16         |        |      | 110.6948531   | 169.309067    | 77.46165224   | 315.3452875      | 45.73662453       | 172.7410694  | 38.52189162    | 264.4310874      | 140.7657129   | 21.67018652    |
| Mean LW16         |        |      | 140.0296989   | 210.9155613   | 98.6487167    | 316.6863816      | 45.29687809       | 195.2324893  | 38.69828955    | 289.4117434      | 166.9747797   | 17.41720573    |
| Median HW16       |        |      | 79.57476652   | 176.0647268   | 77.33291329   | 333.0614799      | 39.12672362       | 133.0989784  | 32.30729839    | 204.9268449      | 99.16686094   | 9.900796269    |
| Median LW16       |        |      | 144.0917339   | 229.3123107   | 95.68498486   | 299.1649326      | 39.69149316       | 211.9912105  | 46.17455174    | 340.2416597      | 169.6417233   | 8.5657496      |
| T-test            |        |      | 0.22184       | 0.122463854   | 0.151686214   | 0.491084419      | 0.486304149       | 0.293019166  | 0.493742215    | 0.393641791      | 0.273831042   | 0.389069354    |

| original<br>Spot# | H or L | week | 12_XPNPEP (chicken)<br>24 | 13_MTR (Goat)<br>5 | 15_Anti MTR (Goat)<br>65 | 41_COMT<br>23 | 47_L_ACTIN<br>22 | 48_TIM<br>37 | 51_ALD<br>74 | 53_L_ABCA1<br>49 |
|-------------------|--------|------|---------------------------|--------------------|--------------------------|---------------|------------------|--------------|--------------|------------------|
| H2W18             | H      | 18   | 452.9165137               | 300.1827442        | 233.9870369              | 45.57052849   | 80.83512091      | 72.749376    | 299.1531655  | 196.735008       |
| H3W18             | H      | 18   | 661.9366492               | 222.5757718        | 461.3325974              | 83.76839775   | 147.4757523      | 157.9676132  | 479.4000229  | 566.0965656      |
| H4W18             | H      | 18   | 1289.905455               | 355.7164755        | 656.3448286              | 49.32793016   | 295.2194832      | 205.7054952  | 799.6133038  | 704.4455362      |
| H5W18             | H      | 18   | 1247.414948               | 516.9411764        | 898.4835551              | 277.8705386   | 228.1995934      | 331.7984207  | 1047.558666  | 809.1616081      |
| H6W18             | H      | 18   | 540.4257914               | 243.9880663        | 304.8942707              | 36.4140601    | 142.0490099      | 78.7722859   | 302.5707693  | 456.2348681      |
| H7W18             | H      | 18   | 696.5217883               | 211.5899305        | 584.6350686              | 316.09188     | 226.5305913      | 308.0960116  | 469.8149495  | 497.5412449      |
| H8W18             | H      | 18   | 63.0353352                | 283.3445073        | 296.9491749              | 119.364555    | 224.1796596      | 227.6028339  | 407.1345969  | 464.4339336      |
| H9W18             | H      | 18   | 287.995701                | 106.8340587        | 181.4721066              | 36.8064849    | 96.7965348       | 118.6674504  | 274.4139885  | 289.5481986      |
| L1W18             | L      | 18   | 1062.037083               | 384.013            | 757.347615               | 390.2741061   | 320.6141479      | 482.7438718  | 890.1240628  | 1102.37313       |
| L3W18             | L      | 18   | 195.0866671               | 79.339             | 165.0726067              | 63.19339683   | 130.1919154      | 110.4918084  | 172.6255629  | 339.9497754      |
| L4W18             | L      | 18   | 324.8721361               | 98.56097366        | 254.7149732              | 48.55154543   | 144.4119027      | 140.7720667  | 230.9645872  | 380.3536812      |
| L5W18             | L      | 18   | 488.3038173               | 195.4291103        | 464.8847241              | 239.4640944   | 307.0181986      | 237.3040004  | 413.2928089  | 354.4657886      |
| L6W18             | L      | 18   | 579.8609006               | 438.5459296        | 679.0814747              | 427.6768901   | 222.4801258      | 267.7024702  | 675.2024182  | 652.1785943      |
| L7W18             | L      | 18   | 221.5436108               | 168.7199889        | 263.6957589              | 76.23613549   | 205.1414869      | 127.0455597  | 279.7289235  | 326.7052257      |
| L8W18             | L      | 18   | 440.679449                | 165.650737         | 370.7714966              | 115.2695896   | 155.6642658      | 195.2420408  | 368.1687188  | 393.3753492      |
| L9W18             | L      | 18   | 346.161843                | 143.1549405        | 164.8560582              | 44.7301539    | 69.1929063       | 60.665418    | 166.8325626  | 195.5221389      |
| Mean HW18         |        |      | 655.0190227               | 280.1465913        | 452.2623298              | 120.6517969   | 180.1607182      | 187.6699359  | 509.9574329  | 498.0246204      |
| Mean LW18         |        |      | 457.3181883               | 209.17671          | 390.0530884              | 175.674489    | 194.3393687      | 202.7459045  | 399.6174556  | 468.1154605      |
| Median HW18       |        |      | 601.1812203               | 263.6662868        | 383.1134341              | 66.54816396   | 185.827706       | 181.8365542  | 438.4747732  | 480.9875892      |
| Median LW18       |        |      | 393.420646                | 167.185363         | 317.2336277              | 95.75286254   | 180.4028764      | 168.0070537  | 323.9488211  | 367.4097349      |
| T-test            |        |      | 0.147903525               | 0.139325503        | 0.303804752              | 0.218084198   | 0.366103979      | 0.399931687  | 0.210892142  | 0.406286101      |

| original<br>Spot# | H or L | week | 54_L_V-ATPase<br>13 | 55_SMT1<br>21 | 56_GAPDH<br>26 | 57_lipocalin<br>53 | 58_L_GPX<br>54 | 60_HSP17.6<br>80 | 63_ACTG2<br>68 | 68_PrxQ<br>51 |
|-------------------|--------|------|---------------------|---------------|----------------|--------------------|----------------|------------------|----------------|---------------|
| H2W18             | H      | 18   | 41.04331425         | 163.0462461   | 134.2222153    | 415.6210688        | 256.1539901    | 55.50195953      | 166.9849202    | 206.3668125   |
| H3W18             | H      | 18   | 235.1024169         | 435.9271885   | 319.2086542    | 681.7140834        | 233.5909497    | 50.04840028      | 514.2502029    | 481.5719785   |
| H4W18             | H      | 18   | 250.1384383         | 789.7965928   | 324.7169406    | 954.2869278        | 227.7152907    | 51.69066781      | 867.8765562    | 636.9702195   |
| H5W18             | H      | 18   | 321.4416875         | 766.7318222   | 534.1618356    | 1178.670105        | 307.9543484    | 103.5684053      | 931.3168008    | 946.8603113   |
| H6W18             | H      | 18   | 71.75046478         | 348.6611596   | 238.1214133    | 447.5581433        | 0              | 50.90544924      | 338.8159672    | 218.3728605   |
| H7W18             | H      | 18   | 243.0770271         | 487.5871065   | 502.0533411    | 437.7159537        | 237.4886995    | 114.1233005      | 564.5026371    | 636.8514347   |
| H8W18             | H      | 18   | 207.458258          | 96.3212718    | 229.6302017    | 687.2214972        | 30.03434325    | 91.97596185      | 588.1372731    | 468.8349018   |
| H9W18             | H      | 18   | 149.2383224         | 174.964155    | 270.6918509    | 363.1911935        | 97.83772605    | 35.96868915      | 299.1316487    | 299.8248663   |
| L1W18             | L      | 18   | 429.4360907         | 861.5331655   | 1380.63008     | 757.1683148        | 402.8093069    | 157.3044311      | 1259.663839    | 767.2483737   |
| L3W18             | L      | 18   | 168.8630275         | 148.2365209   | 73.06567694    | 284.8505317        | 135.4613085    | 29.98051631      | 226.5467158    | 185.5893221   |
| L4W18             | L      | 18   | 178.5054356         | 231.5876691   | 149.2633936    | 271.7737115        | 145.528195     | 57.17871276      | 298.1753312    | 242.1999583   |
| L5W18             | L      | 18   | 201.1215436         | 474.9956055   | 279.3233589    | 509.9046208        | 252.8447442    | 91.60230747      | 689.6814626    | 527.2178539   |
| L6W18             | L      | 18   | 346.4194288         | 371.1721998   | 313.517715     | 933.0062677        | 229.5724533    | 121.422368       | 618.0965353    | 630.6940855   |
| L7W18             | L      | 18   | 155.0473228         | 145.0090451   | 59.57026928    | 477.2469781        | 61.75551632    | 8.924149456      | 333.7544889    | 246.4369049   |
| L8W18             | L      | 18   | 215.3650669         | 365.5147188   | 304.0561735    | 607.0094773        | 279.7150125    | 11.3340397       | 501.8242915    | 428.3261406   |
| L9W18             | L      | 18   | 103.6409522         | 139.6052703   | 83.71733265    | 435.4995272        | 70.72939395    | 42.37343145      | 254.2397414    | 249.3569475   |
| Mean HW18         |        |      | 189.9062411         | 407.8794428   | 319.1008066    | 645.7473716        | 173.8469185    | 69.22285421      | 533.8770008    | 486.9566731   |
| Mean LW18         |        |      | 224.7998585         | 342.2067744   | 330.3929999    | 534.5574286        | 197.3019913    | 65.01499453      | 522.7478007    | 409.6336983   |
| Median HW18       |        |      | 221.2803374         | 392.294174    | 294.9502525    | 564.6361134        | 230.6531202    | 53.59631367      | 539.37642      | 475.2034402   |
| Median LW18       |        |      | 189.8134896         | 298.551194    | 214.2933763    | 493.5757995        | 187.5503242    | 49.7760721       | 417.7893902    | 338.8415441   |
| T-test            |        |      | 0.252856865         | 0.307746931   | 0.47304312     | 0.205012744        | 0.345093279    | 0.424754155      | 0.471734552    | 0.259522787   |



| original<br>Spot# | H or L | week | 75_HECT<br>30 | 76_FtsZ<br>32 | 77_NACA<br>33 | 78_GST phi<br>41 | 79_U2-SnRNP<br>48 | 80_PLD<br>63 | 81_RPL10<br>72 | 83_Catalase<br>9 | 84_RbcL<br>56 | 85_MCCC1<br>67 |
|-------------------|--------|------|---------------|---------------|---------------|------------------|-------------------|--------------|----------------|------------------|---------------|----------------|
| H2W18             | H      | 18   | 157.974246    | 189.914303    | 97.12253701   | 438.392237       | 77.77209613       | 255.6255557  | 52.90331646    | 183.0285303      | 196.9639286   | 14.87780672    |
| H3W18             | H      | 18   | 205.6824297   | 343.1686751   | 156.6612194   | 545.864324       | 77.25891113       | 301.3540493  | 82.65325397    | 519.409243       | 225.3717583   | 58.847266      |
| H4W18             | H      | 18   | 244.4811829   | 647.4847629   | 279.2768194   | 924.2951056      | 159.3876024       | 516.3575027  | 139.2255923    | 736.5038514      | 415.0161906   | 110.7837068    |
| H5W18             | H      | 18   | 219.4298165   | 702.8104818   | 206.8075368   | 953.2922445      | 222.818115        | 408.3595783  | 100.7323562    | 1405.585531      | 286.9133979   | 26.28105594    |
| H6W18             | H      | 18   | 149.7310998   | 146.2072928   | 139.0358197   | 266.6501309      | 59.6017873        | 228.717654   | 53.68972826    | 578.3066827      | 217.0362024   | 35.271654      |
| H7W18             | H      | 18   | 320.6667844   | 411.4686953   | 168.088843    | 556.065509       | 159.1566197       | 336.6506702  | 22.87259942    | 747.2754604      | 271.5233736   | 0              |
| H8W18             | H      | 18   | 155.8890341   | 283.2516156   | 119.5186068   | 432.3349892      | 49.424526         | 234.1733223  | 22.07303835    | 254.9420384      | 157.823766    | 0              |
| H9W18             | H      | 18   | 61.87299915   | 116.7747276   | 90.7209087    | 255.5745464      | 31.0342791        | 141.7434183  | 25.73005905    | 82.98386715      | 64.7104104    | 0              |
| L1W18             | L      | 18   | 355.8589175   | 753.1443668   | 339.3805244   | 884.6815256      | 217.6783338       | 714.6227804  | 150.4164803    | 1158.218503      | 622.7668708   | 46.52825747    |
| L3W18             | L      | 18   | 187.8466917   | 156.9109571   | 99.6978541    | 298.4512081      | 27.47766255       | 142.6055521  | 25.87997344    | 317.3644356      | 111.5768859   | 23.3321998     |
| L4W18             | L      | 18   | 152.6041064   | 184.5573987   | 67.4262225    | 184.4014567      | 35.14478648       | 196.3298196  | 17.25755916    | 354.7604352      | 119.6698819   | 4.185941737    |
| L5W18             | L      | 18   | 368.7852788   | 418.1384104   | 112.0207266   | 445.3785078      | 122.4599574       | 306.3011573  | 29.77474897    | 591.1920516      | 308.1660628   | 0              |
| L6W18             | L      | 18   | 273.079162    | 529.9551453   | 211.8720759   | 956.5359226      | 142.7172447       | 327.1910836  | 27.16670684    | 533.3709234      | 197.2509832   | 13.42001669    |
| L7W18             | L      | 18   | 148.5314603   | 149.1644915   | 76.0487721    | 331.4376755      | 17.88768313       | 147.3892358  | 13.70447004    | 129.21474        | 89.90476425   | 0              |
| L8W18             | L      | 18   | 232.7697335   | 207.5181178   | 124.4683536   | 451.5384227      | 47.7462562        | 175.4907074  | 56.5735929     | 412.9147607      | 118.295415    | 65.2793764     |
| L9W18             | L      | 18   | 43.46094465   | 101.991888    | 59.7292173    | 245.7018428      | 56.0686653        | 119.289933   | 20.94104475    | 126.7631969      | 77.4310851    | 0              |
| Mean HW18         |        |      | 189.4659491   | 355.1350693   | 157.1540364   | 546.5586358      | 104.5567421       | 302.8727188  | 62.484993      | 563.5044005      | 229.4198785   | 30.75768619    |
| Mean LW18         |        |      | 220.3670368   | 312.672597    | 136.3304683   | 474.7658202      | 83.39757369       | 266.1525336  | 42.71432205    | 452.9748808      | 205.6327436   | 19.09322401    |
| Median HW18       |        |      | 181.8283379   | 313.2101453   | 147.8485196   | 492.1282805      | 77.51550363       | 278.4898025  | 53.29652236    | 548.8579628      | 221.2039803   | 20.57943133    |
| Median LW18       |        |      | 210.3082126   | 196.0377583   | 105.8592903   | 388.4080916      | 51.90746075       | 185.9102635  | 26.52334014    | 383.837598       | 118.9826484   | 8.802979212    |
| T-test            |        |      | 0.263924118   | 0.356624941   | 0.306924934   | 0.307134531      | 0.274893967       | 0.329256689  | 0.191304577    | 0.28469511       | 0.377853273   | 0.241804834    |
