# Supplementary material for: Differential abundance analysis of mesocarp protein from high- and low-yielding oil palms associates non-oil biosynthetic enzymes to lipid biosynthesis
Source: PubMed Central journal article supplement (PMC4661986; doi:10.1186/s12953-015-0085-2), 2015-11-26
Supplement: 12953_2015_85_MOESM7_ESM.pdf [file 12953_2015_85_MOESM7_ESM.pdf]

| original<br>Spot# | H or L | week | 51_ALD<br>74 | 53_ABCA1<br>49 | 54_V-ATPase<br>13 | 55_SMT1<br>21 | 56_GAPDH<br>26 | 57_lipocalin<br>53 |
|-------------------|--------|------|--------------|----------------|-------------------|---------------|----------------|--------------------|
| H2W12             | H      | 12   | 58.68839938  | 93.05518978    | 247.9679754       | 83.54515675   | 166.7209481    | 334.3940602        |
| H3W12             | H      | 12   | 20.59257872  | 22.32321224    | 81.16033856       | 64.83957424   | 40.4361188     | 147.9456479        |
| H4W12             | H      | 12   | 65.13398483  | 90.64652135    | 324.8504275       | 171.1918429   | 94.66482511    | 305.2922037        |
| H5W12             | H      | 12   | 44.63786932  | 50.09171939    | 190.1616947       | 80.50924058   | 82.6706647     | 175.3464679        |
| H6W12             | H      | 12   | 26.78588175  | 50.4166995     | 195.6110681       | 137.3619381   | 104.2337002    | 164.7527733        |
| H7W12             | H      | 12   | 68.78978858  | 65.26115993    | 293.788349        | 140.4017245   | 196.9495448    | 184.0453814        |
| H8W12             | H      | 12   | 132.6655326  | 196.7939103    | 482.473662        | 380.5472436   | 376.5408089    | 490.8516224        |
| H9W12             | H      | 12   | 25.7024038   | 33.02118863    | 69.62464206       | 39.41220871   | 78.8243802     | 156.4980626        |
| Mean HW12         |        | 12   | 55.37455487  | 75.20120014    | 235.7047697       | 137.2261162   | 142.6301238    | 244.8907774        |
| Median HW12       |        | 12   | 51.66313435  | 57.83892971    | 221.7895218       | 110.4535474   | 99.44926263    | 179.6959247        |
|                   |        |      |              |                |                   |               |                |                    |
| H2W16             | H      | 16   | 220.0007821  | 293.3707067    | 323.9250519       | 179.0566214   | 101.5211664    | 421.0777045        |
| H3W16             | H      | 16   | 82.75657021  | 30.22282853    | 174.7539858       | 207.4224283   | 251.1901827    | 309.6608579        |
| H4W16             | H      | 16   | 197.7346008  | 166.8977766    | 413.1754026       | 199.2266762   | 265.0093873    | 439.1006298        |
| H5W16             | H      | 16   | 190.3857164  | 115.4912458    | 202.7245298       | 188.9004686   | 142.0963089    | 329.6837561        |
| H6W16             | H      | 16   | 218.6304148  | 249.806371     | 609.4376009       | 382.2641558   | 339.5184806    | 522.8521218        |
| H7W16             | H      | 16   | 118.9975569  | 90.87733725    | 322.5331003       | 168.207513    | 175.5208       | 196.8973604        |
| H8W16             | H      | 16   | 69.23182422  | 89.8679975     | 110.6304081       | 81.13146734   | 46.57846023    | 200.9714324        |
| H9W16             | H      | 16   | 193.126268   | 122.9746672    | 437.5839066       | 176.880298    | 250.8472315    | 504.8360739        |
| Mean HW16         |        | 16   | 161.3579667  | 144.9386163    | 324.3454982       | 197.8862036   | 196.5352522    | 365.6349921        |
| Median HW16       |        | 16   | 191.7559922  | 119.2329565    | 323.2290761       | 183.978545    | 213.1840158    | 375.3807303        |
|                   |        |      |              |                |                   |               |                |                    |
| H2W18             | H      | 18   | 299.1531655  | 198.1080803    | 334.3403986       | 163.0462461   | 134.2222153    | 415.6210688        |
| H3W18             | H      | 18   | 479.4000229  | 95.64974509    | 560.8643067       | 435.9271885   | 319.2086542    | 681.7140834        |
| H4W18             | H      | 18   | 799.6133038  | 371.7332005    | 1257.227272       | 789.7965928   | 324.7169406    | 954.2869278        |
| H5W18             | H      | 18   | 1047.558666  | 435.1928835    | 976.6173528       | 766.7318222   | 534.1618356    | 1178.670105        |
| H6W18             | H      | 18   | 302.5707693  | 230.6908032    | 550.1867542       | 348.6611596   | 238.1214133    | 447.5581433        |
| H7W18             | H      | 18   | 469.8149495  | 219.9572005    | 808.896297        | 487.5871065   | 502.0533411    | 437.7159537        |
| H8W18             | H      | 18   | 407.1345969  | 190.5590058    | 594.2814065       | 96.3212718    | 229.6302017    | 687.2214972        |
| H9W18             | H      | 18   | 274.4139885  | 41.95767405    | 335.5002609       | 174.964155    | 270.6918509    | 363.1911935        |
| Mean HW18         |        | 18   | 509.9574329  | 222.9810741    | 677.2392561       | 407.8794428   | 319.1008066    | 645.7473716        |
| Median HW18       |        | 18   | 438.4747732  | 209.0326404    | 577.5728566       | 392.294174    | 294.9502525    | 564.6361134        |
|                   |        |      |              |                |                   |               |                |                    |
| t-test HW12xW16   |        |      | 0.004743139  | 0.045795542    | 0.166062909       | 0.161219967   | 0.224144496    | 0.069361311        |
| t-test Hw12xW18   |        |      | 0.001167062  | 0.008411331    | 0.002201901       | 0.021620038   | 0.01743159     | 0.003858552        |
| t-test HW16xW18   |        |      | 0.004658255  |                |                   |               |                |                    |





| original<br>Spot# | H or L | week | 83_Catalase<br>9 | 84_RbcL<br>56 | 85_MCCC1<br>67 |
|-------------------|--------|------|------------------|---------------|----------------|
| H2W12             | H      | 12   | 268.7701131      | 78.64589148   | 0.26177065     |
| H3W12             | H      | 12   | 20.65782488      | 46.09663072   | 2.82152864     |
| H4W12             | H      | 12   | 142.3299915      | 90.26728935   | 0              |
| H5W12             | H      | 12   | 176.2002525      | 105.8013475   | 28.67401945    |
| H6W12             | H      | 12   | 212.0619931      | 86.95486088   | 22.15662675    |
| H7W12             | H      | 12   | 261.0885062      | 83.49870458   | 9.210003425    |
| H8W12             | H      | 12   | 513.1701131      | 269.8236585   | 17.2724091     |
| H9W12             | H      | 12   | 23.19192242      | 37.43056516   | 0              |
| Mean HW12         |        | 12   | 202.1838396      | 99.81486852   | 10.04954475    |
| Median HW12       |        | 12   | 194.1311228      | 85.22678273   | 6.015766033    |
|                   |        |      |                  |               |                |
| H2W16             | H      | 16   | 155.6390693      | 216.1014718   | 0              |
| H3W16             | H      | 16   | 122.0910509      | 81.11086698   | 25.70667456    |
| H4W16             | H      | 16   | 243.7409434      | 170.6528029   | 19.80159254    |
| H5W16             | H      | 16   | 330.3777869      | 110.8185261   | 25.63686082    |
| H6W16             | H      | 16   | 710.4401851      | 301.356879    | 102.2163643    |
| H7W16             | H      | 16   | 314.1117578      | 87.51519581   | 0              |
| H8W16             | H      | 16   | 166.1127463      | 85.64413188   | 0              |
| H9W16             | H      | 16   | 72.93515938      | 72.92582859   | 0              |
| Mean HW16         |        | 16   | 264.4310874      | 140.7657129   | 21.67018652    |
| Median HW16       |        | 16   | 204.9268449      | 99.16686094   | 9.900796269    |
|                   |        |      |                  |               |                |
| H2W18             | H      | 18   | 183.0285303      | 196.9639286   | 14.87780672    |
| H3W18             | H      | 18   | 519.409243       | 225.3717583   | 58.847266      |
| H4W18             | H      | 18   | 736.5038514      | 415.0161906   | 110.7837068    |
| H5W18             | H      | 18   | 1405.585531      | 286.9133979   | 26.28105594    |
| H6W18             | H      | 18   | 578.3066827      | 217.0362024   | 35.271654      |
| H7W18             | H      | 18   | 747.2754604      | 271.5233736   | 0              |
| H8W18             | H      | 18   | 254.9420384      | 157.823766    | 0              |
| H9W18             | H      | 18   | 82.98386715      | 64.7104104    | 0              |
| Mean HW18         |        | 18   | 563.5044005      | 229.4198785   | 30.75768619    |
| Median HW18       |        | 18   | 548.8579628      | 221.2039803   | 20.57943133    |
|                   |        |      |                  |               |                |
| t-test HW12xW16   |        |      | 0.242748337      | 0.175844409   | 0.160610528    |
| t-test Hw12xW18   |        |      | 0.032083397      | 0.012295577   | 0.106194493    |
| t-test HW16xW18   |        |      |                  |               |                |
