# Supplementary material for: Differential abundance analysis of mesocarp protein from high- and low-yielding oil palms associates non-oil biosynthetic enzymes to lipid biosynthesis
Source: Proteome Sci. 2015 Nov 26;13:28. doi: 10.1186/s12953-015-0085-2 (PMC4661986; doi:10.1186/s12953-015-0085-2)
Supplement: Additional file 3: — Protein-peptide summary of MASCOT protein identification. Protein-peptide summary of MASCOT protein identification. (XLSX 396 kb) [file 12953_2015_85_MOESM3_ESM.xlsx]

## Sheet: Protein_peptide Summary
Additional File 3. Protein-peptide summary of MASCOT protein identification.
Analysis Information
	Report Type			Protein-Peptide Summary by Spot						Analysis Type			Combined (MS+MS/MS)
	Sample Set Name									Database			NCBInr
Gel Idx/Pos			Spot #5						Instr./Gel Origin		AB4700/091116A						Process Status		Analysis Succeeded
Plate [#] Name			[1] 8912						Instrument Sample Name								Spectra		6
Rank		Protein Name						Species				Accession No.			Protein MW	Protein	Pep.		Protein	Protein	Total Ion	Total Ion
																PI	Count		Score	Score	Score	C. I. %
																				C. I. %
	1	unknown [Zea mays]										gi|219887485			84565.4	5.83	12	212		100	168	100
		Peptide Information
		Calc. Mass		Obsrv. Mass	± da	± ppm	Start	End	Sequence			Ion	C. I. %		Modification					Rank	Result Type
							Seq.	Seq.				Score
		942.562	942.458		-0.1041	-110	358	366	VVEVNALAK												Mascot
		1021.55	1021.44		-0.1076	-105	349	357	SWLAFAAQK												Mascot
		1096.58	1096.47		-0.1118	-102	287	296	YLFAGVVDGR			56	99.673								Mascot
		1096.58	1096.47		-0.1118	-102	287	296	YLFAGVVDGR												Mascot
		1130.57	1130.45		-0.1186	-105	705	714	IPSTEEIADR												Mascot
		1199.57	1199.45		-0.128	-107	19	28	FALESFWDGK												Mascot
		1486.77	1486.62		-0.1544	-104	705	717	IPSTEEIADRVEK												Mascot
		1658.83	1658.66		-0.1733	-104	689	704	YGAGIGPGVYDIHSPR			79	99.998								Mascot
		1658.83	1658.66		-0.1733	-104	689	704	YGAGIGPGVYDIHSPR												Mascot
		1739.85	1739.74		-0.1063	-61	373	388	DEVYFAANAAAQASRR												Mascot
		1806.96	1806.76		-0.196	-108	556	571	GMLTGPVTILNWSFVR						Oxidation (M)[2]						Mascot
		1991.01	1990.8		-0.2111	-106	477	493	IQEELDIDVLVHGEPER												Mascot
		2263.13	2262.9		-0.2351	-104	322	342	LVVSTSCSLMHTAVDLVN						Oxidation (M)[10]						Mascot
									ETK
		2282.19	2281.94		-0.2468	-108	590	610	EVEDLEAAGIQVIQIDEAA			33	24.295								Mascot
									LR
		2282.19	2281.94		-0.2468	-108	590	610	EVEDLEAAGIQVIQIDEAA												Mascot
									LR
		2304.16	2303.91	2303.91	-0.2454	-107	322	342	LVVSTSCSLMHTAVDLVN						Carbamidomethyl (C)[7]						Mascot	Mascot
									ETK
	2	methionine synthase protein [Sorghum bicolor]										gi|18483235			83736	5.93	12	211		100	166	100
		Peptide Information
		Calc. Mass		Obsrv. Mass	± da	± ppm	Start	End	Sequence			Ion	C. I. %		Modification					Rank	Result Type
							Seq.	Seq.				Score
		942.562	942.458		-0.1041	-110	353	361	VVEVNALAK												Mascot
		1021.55	1021.44		-0.1076	-105	344	352	SWLAFAAQK												Mascot
		1096.58	1096.47		-0.1118	-102	282	291	YLFAGVVDGR			56	99.673								Mascot
		1096.58	1096.47		-0.1118	-102	282	291	YLFAGVVDGR												Mascot
		1130.58	1130.45		-0.1273	-113	1	10	MASHIVGYPR												Mascot
		1144.58	1144.5		-0.088	-77	700	709	IPTTEEIADR												Mascot
		1199.57	1199.45		-0.128	-107	19	28	FALESFWDGK												Mascot
		1555.71	1555.56		-0.156	-100	368	382	DEAYFAANAAAQASR												Mascot
		1658.83	1658.66		-0.1733	-104	684	699	YGAGIGPGVYDIHSPR			79	99.998								Mascot
		1658.83	1658.66		-0.1733	-104	684	699	YGAGIGPGVYDIHSPR												Mascot
		1806.96	1806.76		-0.196	-108	551	566	GMLTGPVTILNWSFVR						Oxidation (M)[2]						Mascot
		1991.01	1990.8		-0.2111	-106	472	488	IQEELDIDVLVHGEPER												Mascot
		2263.13	2262.9		-0.2351	-104	317	337	LVVSTSCSLMHTAVDLVN						Oxidation (M)[10]						Mascot
									ETK
		2282.19	2281.94		-0.2468	-108	585	605	EVEDLEAAGIQVIQIDEAA			33	24.295								Mascot
									LR
		2282.19	2281.94		-0.2468	-108	585	605	EVEDLEAAGIQVIQIDEAA												Mascot
									LR
		2304.16	2303.91		-0.2454	-107	317	337	LVVSTSCSLMHTAVDLVN						Carbamidomethyl (C)[7]						Mascot
									ETK
	3	5-methyltetrahydropteroyltriglutamate--homocysteine										gi|195657041			84417.3	5.85	11	204		100	166	100
		methyltransferase [Zea mays]
		Peptide Information
		Calc. Mass		Obsrv. Mass	± da	± ppm	Start	End	Sequence			Ion	C. I. %		Modification					Rank	Result Type
							Seq.	Seq.				Score
		942.562	942.458		-0.1041	-110	358	366	VVEVNALAK												Mascot
		1021.55	1021.44		-0.1076	-105	349	357	SWLAFAAQK												Mascot
		1096.58	1096.47		-0.1118	-102	287	296	YLFAGVVDGR			56	99.673								Mascot
		1096.58	1096.47		-0.1118	-102	287	296	YLFAGVVDGR												Mascot
		1130.57	1130.45		-0.1186	-105	705	714	IPSTEEIADR												Mascot
		1199.57	1199.45		-0.128	-107	19	28	FALESFWDGK												Mascot
		1555.71	1555.56		-0.156	-100	373	387	DEAYFAANAAAQASR												Mascot
		1658.83	1658.66		-0.1733	-104	689	704	YGAGIGPGVYDIHSPR			79	99.998								Mascot
		1658.83	1658.66		-0.1733	-104	689	704	YGAGIGPGVYDIHSPR												Mascot
		1806.96	1806.76		-0.196	-108	556	571	GMLTGPVTILNWSFVR						Oxidation (M)[2]						Mascot
		1991.01	1990.8		-0.2111	-106	477	493	IQEELDIDVLVHGEPER												Mascot
		2263.13	2262.9		-0.2351	-104	322	342	LVVSTSCSLMHTAVDLVN						Oxidation (M)[10]						Mascot
									ETK
		2282.19	2281.94		-0.2468	-108	590	610	EVEDLEAAGIQVIQIDEAA			33	24.295								Mascot
									LR
		2282.19	2281.94		-0.2468	-108	590	610	EVEDLEAAGIQVIQIDEAA												Mascot
									LR
		2304.16	2303.91		-0.2454	-107	322	342	LVVSTSCSLMHTAVDLVN						Carbamidomethyl (C)[7]						Mascot
									ETK
	4	vitamin-b12 independent methionine synthase,										gi|224131686			84544.5	6.26	12	179		100	135	100
		5-methyltetrahydropteroyltriglutamate-homocysteine [Po
		Peptide Information
		Calc. Mass		Obsrv. Mass	± da	± ppm	Start	End	Sequence			Ion	C. I. %		Modification					Rank	Result Type
							Seq.	Seq.				Score
		942.562	942.458		-0.1041	-110	358	366	VVEVNALAK												Mascot
		1021.55	1021.44		-0.1076	-105	349	357	SWLAFAAQK												Mascot
		1096.58	1096.47		-0.1118	-102	287	296	YLFAGVVDGR			56	99.673								Mascot
		1096.58	1096.47		-0.1118	-102	287	296	YLFAGVVDGR												Mascot
		1130.58	1130.45		-0.1273	-113	1	10	MASHIVGYPR												Mascot
		1158.56	1158.47		-0.0896	-77	705	714	IPSEEEIADR												Mascot
		1199.57	1199.45		-0.128	-107	19	28	FALESFWDGK												Mascot
		1658.83	1658.66		-0.1733	-104	689	704	YGAGIGPGVYDIHSPR			79	99.998								Mascot
		1658.83	1658.66		-0.1733	-104	689	704	YGAGIGPGVYDIHSPR												Mascot
		1806.96	1806.76		-0.196	-108	556	571	GMLTGPVTILNWSFVR						Oxidation (M)[2]						Mascot
		1991.01	1990.8		-0.2111	-106	477	493	IQEELDIDVLVHGEPER												Mascot
		2234.06	2233.85		-0.2126	-95	537	555	AMTVFWSSMAQSMTKR						Oxidation (M)[2]						Mascot
									PMK
		2282.04	2281.94		-0.103	-45	537	555	AMTVFWSSMAQSMTKR						Oxidation (M)[2,9,13,18]						Mascot
									PMK
		2282.21	2281.94		-0.2654	-116	322	342	LVVSTSCSLLHTAVDLVN						Carbamidomethyl (C)[7]						Mascot
									EPK
		2328.26	2328.01		-0.2522	-108	427	447	LNLPILPTTTIGSFPQTMD												Mascot
									LR
		2344.26	2344.01		-0.2488	-106	427	447	LNLPILPTTTIGSFPQTMD						Oxidation (M)[18]						Mascot
									LR
	5	Os12g0623900 [Oryza sativa (japonica cultivar-group)]										gi|115489652			84531.5	5.93	12	177		100	133	100
		Peptide Information
		Calc. Mass		Obsrv. Mass	± da	± ppm	Start	End	Sequence			Ion	C. I. %		Modification					Rank	Result Type
							Seq.	Seq.				Score
		942.562	942.458		-0.1041	-110	359	367	VVEVNALAK												Mascot
		1021.55	1021.44		-0.1076	-105	350	358	SWLAFAAQK												Mascot
		1096.58	1096.47		-0.1118	-102	288	297	YLFAGVVDGR			56	99.673								Mascot
			1096.47																		Mascot
		1096.58	1096.47		-0.1118	-102	288	297	YLFAGVVDGR												Mascot
		1130.57	1130.45		-0.1186	-105	706	715	IPSTEEIADR												Mascot
		1199.57	1199.45		-0.128	-107	19	28	FALESFWDGK												Mascot
		1555.71	1555.56		-0.156	-100	374	388	DEAYFAANAAAQASR												Mascot
		1658.83	1658.66		-0.1733	-104	690	705	YGAGIGPGVYDIHSPR			79	99.998								Mascot
		1658.83	1658.66		-0.1733	-104	690	705	YGAGIGPGVYDIHSPR												Mascot
		1806.96	1806.76		-0.196	-108	557	572	GMLTGPVTILNWSFVR						Oxidation (M)[2]						Mascot
		1991.01	1990.8		-0.2111	-106	478	494	IQEELDIDVLVHGEPER												Mascot
		2059.92	2059.66		-0.2569	-125	82	99	YSWTGGEIGFSTYFSMA												Mascot
									R
		2263.13	2262.9		-0.2351	-104	323	343	LVVSTSCSLMHTAVDLVN						Oxidation (M)[10]						Mascot
									ETK
		2304.16	2303.91		-0.2454	-107	323	343	LVVSTSCSLMHTAVDLVN						Carbamidomethyl (C)[7]						Mascot
									ETK
		2937.4	2937.08		-0.3162	-108	56	81	YIPSNTFSYYDQVLDTAA						Oxidation (M)[19]						Mascot
									MLGAVPER
	6	5-methyltetrahydropteroyltriglutamate-homocysteine										gi|108862992			84582.4	5.93	11	173		100	135	100
		methyltransferase, putative, expressed [Oryza sa
		Peptide Information
		Calc. Mass		Obsrv. Mass	± da	± ppm	Start	End	Sequence			Ion	C. I. %		Modification					Rank	Result Type
							Seq.	Seq.				Score
		942.562	942.458		-0.1041	-110	359	367	VVEVNALAK												Mascot
		1021.55	1021.44		-0.1076	-105	350	358	SWLAFAAQK												Mascot
		1096.58	1096.47		-0.1118	-102	288	297	YLFAGVVDGR			56	99.673								Mascot
		1096.58	1096.47		-0.1118	-102	288	297	YLFAGVVDGR												Mascot
		1130.57	1130.45		-0.1186	-105	706	715	IPSTEEIADR												Mascot
		1199.57	1199.45		-0.128	-107	19	28	FALESFWDGK												Mascot
		1658.83	1658.66		-0.1733	-104	690	705	YGAGIGPGVYDIHSPR			79	99.998								Mascot
		1658.83	1658.66		-0.1733	-104	690	705	YGAGIGPGVYDIHSPR												Mascot
		1806.96	1806.76		-0.196	-108	557	572	GMLTGPVTILNWSFVR						Oxidation (M)[2]						Mascot
		1991.01	1990.8		-0.2111	-106	478	494	IQEELDIDVLVHGEPER												Mascot
		2059.92	2059.66		-0.2569	-125	82	99	YSWTGGEIGFSTYFSMA												Mascot
									R
		2263.13	2262.9		-0.2351	-104	323	343	LVVSTSCSLMHTAVDLVN						Oxidation (M)[10]						Mascot
									ETK
		2304.16	2303.91		-0.2454	-107	323	343	LVVSTSCSLMHTAVDLVN						Carbamidomethyl (C)[7]						Mascot
									ETK
		2937.4	2937.08		-0.3162	-108	56	81	YIPSNTFSYYDQVLDTAA						Oxidation (M)[19]						Mascot
									MLGAVPER
	7	methionine synthase [Phelipanche ramosa]										gi|113473614			84519.7	6.02	11	170		100	133	100
		Peptide Information
							Start	End				Ion
		Calc. Mass		Obsrv. Mass	± da	± ppm			Sequence				C. I. %		Modification					Rank	Result Type
							Seq.	Seq.				Score
		942.562	942.458		-0.1041	-110	358	366	VVEVNALAK												Mascot
		1021.55	1021.44		-0.1076	-105	349	357	SWLAFAAQK												Mascot
		1096.58	1096.47		-0.1118	-102	287	296	YLFAGVVDGR			56	99.673								Mascot
		1096.58	1096.47		-0.1118	-102	287	296	YLFAGVVDGR												Mascot
		1130.58	1130.45		-0.1273	-113	1	10	MASHIVGYPR												Mascot
		1199.57	1199.45		-0.128	-107	19	28	FALESFWDGK												Mascot
		1555.71	1555.56		-0.156	-100	373	387	DEAFFSANAAAQASR												Mascot
		1658.83	1658.66		-0.1733	-104	689	704	YGAGIGPGVYDIHSPR			79	99.998								Mascot
		1658.83	1658.66		-0.1733	-104	689	704	YGAGIGPGVYDIHSPR												Mascot
		1739.93	1739.74		-0.193	-111	254	270	ALTSLSAVSGFGFDLVR												Mascot
		1806.96	1806.76		-0.196	-108	556	571	GMLTGPVTILNWSFVR						Oxidation (M)[2]						Mascot
		1991.01	1990.8		-0.2111	-106	477	493	LQEELDIDVLVHGEPER												Mascot
		2282.21	2281.94		-0.2654	-116	322	342	LVVSTSCSLLHTAVDLVN						Carbamidomethyl (C)[7]						Mascot
									EPK
		2282.21	2281.94		-0.2654	-116	322	342	LVVSTSCSLLHTAVDLVN						Carbamidomethyl (C)[7]						Mascot
									EPK
	8	ATCIMS (COBALAMIN-INDEPENDENT METHIONINE										gi|15238686			84303.5	6.09	11	168		100	132	100
		SYNTHASE);
		5-methyltetrahydropteroyltriglutamate-homocyste
		Peptide Information
		Calc. Mass		Obsrv. Mass	± da	± ppm	Start	End	Sequence			Ion	C. I. %		Modification					Rank	Result Type
							Seq.	Seq.				Score
		942.562	942.458		-0.1041	-110	358	366	VVEVNALAK												Mascot
		1021.55	1021.44		-0.1076	-105	349	357	SWLAFAAQK												Mascot
		1096.55	1096.47		-0.0854	-78	457	465	KVSEEDYVK												Mascot
		1096.58	1096.47		-0.1118	-102	287	296	YLFAGVVDGR			56	99.673								Mascot
		1130.58	1130.45		-0.1273	-113	1	10	MASHIVGYPR												Mascot
		1199.57	1199.45		-0.128	-107	19	28	FALESFWDGK												Mascot
		1658.83	1658.66		-0.1733	-104	689	704	YGAGIGPGVYDIHSPR			79	99.998								Mascot
		1658.83	1658.66		-0.1733	-104	689	704	YGAGIGPGVYDIHSPR												Mascot
		1806.96	1806.76		-0.196	-108	556	571	GMLTGPVTILNWSFVR						Oxidation (M)[2]						Mascot
		2208.99	2208.83		-0.1634	-74	537	555	AMTVFWSAMAQSMTSR						Oxidation (M)[2,9,13]						Mascot
									PMK
		2300.22	2299.91		-0.3023	-131	322	342	LVVSTSCSLLHTAVDLINE						Carbamidomethyl (C)[7]						Mascot
									TK
		2304.17	2303.91		-0.2595	-113	474	493	VVDLQEELDIDVLVHGEP												Mascot
									ER
	9	cobalamin-independent methionine synthase										gi|47600741			84261.4	6.09	11	168		100	132	100
		[Arabidopsis thaliana]
		Peptide Information
		Calc. Mass		Obsrv. Mass	± da	± ppm	Start	End	Sequence			Ion	C. I. %		Modification					Rank	Result Type
							Seq.	Seq.				Score
		942.562	942.458		-0.1041	-110	358	366	VVEVNALAK												Mascot
		1096.55	1096.47		-0.0854	-78	457	465	KVSEEDYVK												Mascot
		1096.58	1096.47		-0.1118	-102	287	296	YLFAGVVDGR			56	99.673								Mascot
		1130.58	1130.45		-0.1273	-113	1	10	MASHIVGYPR												Mascot
		1199.57	1199.45		-0.128	-107	19	28	FALESFWDGK												Mascot
		1314.73	1314.55		-0.1758	-134	274	286	TLDLVKAGSPEGK												Mascot
		1658.83	1658.66		-0.1733	-104	689	704	YGAGIGPGVYDIHSPR			79	99.998								Mascot
		1658.83	1658.66		-0.1733	-104	689	704	YGAGIGPGVYDIHSPR												Mascot
		1806.96	1806.76		-0.196	-108	556	571	GMLTGPVTILNWSFVR						Oxidation (M)[2]						Mascot
		2208.99	2208.83		-0.1634	-74	537	555	AMTVFWSAMAQSMTSR						Oxidation (M)[2,9,13]						Mascot
									PMK
		2300.22	2299.91		-0.3023	-131	322	342	LVVSTSCSLLHTAVDLINE						Carbamidomethyl (C)[7]						Mascot
									TK
		2304.17	2303.91		-0.2595	-113	474	493	VVDLQEELDIDVLVHGEP												Mascot
									ER
	10	5-methyltetrahydropteroyltriglutamate-homocysteine										gi|108862990			78929.9	7.19	10	166		100	133	100
		methyltransferase, putative, expressed [Oryza sa
		Peptide Information
		Calc. Mass		Obsrv. Mass	± da	± ppm	Start	End	Sequence			Ion	C. I. %		Modification					Rank	Result Type
							Seq.	Seq.				Score
		942.562	942.458		-0.1041	-110	309	317	VVEVNALAK												Mascot
		1021.55	1021.44		-0.1076	-105	300	308	SWLAFAAQK												Mascot
		1096.58	1096.47		-0.1118	-102	238	247	YLFAGVVDGR			56	99.673								Mascot
		1096.58	1096.47		-0.1118	-102	238	247	YLFAGVVDGR												Mascot
		1130.57	1130.45		-0.1186	-105	656	665	IPSTEEIADR												Mascot
		1555.71	1555.56		-0.156	-100	324	338	DEAYFAANAAAQASR												Mascot
		1658.83	1658.66		-0.1733	-104	640	655	YGAGIGPGVYDIHSPR			79	99.998								Mascot
		1658.83	1658.66		-0.1733	-104	640	655	YGAGIGPGVYDIHSPR												Mascot
		1806.96	1806.76		-0.196	-108	507	522	GMLTGPVTILNWSFVR						Oxidation (M)[2]						Mascot
		1991.01	1990.8		-0.2111	-106	428	444	IQEELDIDVLVHGEPER												Mascot
		2059.92	2059.66		-0.2569	-125	32	49	YSWTGGEIGFSTYFSMA												Mascot
									R
		2263.13	2262.9		-0.2351	-104	273	293	LVVSTSCSLMHTAVDLVN						Oxidation (M)[10]						Mascot
									ETK
		2304.16	2303.91		-0.2454	-107	273	293	LVVSTSCSLMHTAVDLVN						Carbamidomethyl (C)[7]						Mascot
									ETK
Gel Idx/Pos			Spot #7						Instr./Gel Origin		AB4700/091116A					Process Status		Analysis Succeeded
Plate [#] Name									Instrument Sample Name							Spectra		6
Rank		Protein Name						Species				Accession No.		Protein MW	Protein	Pep.		Protein	Protein	Total Ion	Total Ion
															PI	Count		Score	Score	Score	C. I. %
																			C. I. %
	1	OSJNBb0085F13.17 [Oryza sativa (japonica										gi|38345312		80199.8	5.05	12	102		99.996	28	0
		cultivar-group)]
		Peptide Information
		Calc. Mass		Obsrv. Mass	± da	± ppm	Start	End	Sequence			Ion	C. I. %	Modification					Rank	Result Type
							Seq.	Seq.				Score
		940.573	940.481		-0.0915	-97	271	277	QKPIWLR											Mascot
		1081.53	1081.43		-0.1	-92	325	333	APFDLFDTR											Mascot
		1161.55	1161.48		-0.0699	-60	624	634	ADADANDKSVR											Mascot
		1168.57	1168.46		-0.1065	-91	425	434	LGIHEDSQNR											Mascot
		1201.66	1201.55		-0.1121	-93	65	74	LDAQPELFIR											Mascot
		1237.56	1237.51		-0.0427	-35	1	12	MAAAGDVQMAEK					Oxidation (M)[1]						Mascot
		1237.63	1237.51		-0.1199	-97	324	333	RAPFDLFDTR			30	0							Mascot
		1272.69	1272.57		-0.1248	-98	96	107	SDLVNNLGTIAR											Mascot
		1320.66	1320.53		-0.1235	-94	306	316	HFSVEGQLEFK											Mascot
		1323.56	1323.49		-0.0683	-52	595	606	DSSMGAYMSSKK					Oxidation (M)[4,8]						Mascot
		1527.74	1527.65		-0.0966	-63	293	305	SLTNDWEDHLAVK											Mascot
		1527.74	1527.65		-0.0966	-63	293	305	SLTNDWEDHLAVK											Mascot
		1564.8	1564.64		-0.1556	-99	443	456	YHSTKSGNELTSLK											Mascot
	2	hypothetical protein OsI_14582 [Oryza sativa Indica										gi|125546956		80165.8	5.05	12	101		99.995	28	0
		Group]
		Peptide Information
		Calc. Mass		Obsrv. Mass	± da	± ppm	Start	End	Sequence			Ion	C. I. %	Modification					Rank	Result Type
							Seq.	Seq.				Score
		940.573	940.481		-0.0915	-97	271	277	QKPIWLR											Mascot
		1081.53	1081.43		-0.1	-92	325	333	APFDLFDTR											Mascot
		1161.55	1161.48		-0.0699	-60	624	634	ADADANDKSVR											Mascot
		1168.57	1168.46		-0.1065	-91	425	434	LGIHEDSQNR											Mascot
		1201.66	1201.55		-0.1121	-93	65	74	LDAQPELFIR											Mascot
		1237.56	1237.51		-0.0427	-35	1	12	MAAAGDVQMAEK					Oxidation (M)[1]						Mascot
		1237.63	1237.51		-0.1199	-97	324	333	RAPFDLFDTR			30	0							Mascot
		1272.69	1272.57		-0.1248	-98	96	107	SDLVNNLGTIAR											Mascot
		1320.66	1320.53		-0.1235	-94	306	316	HFSVEGQLEFK											Mascot
		1323.56	1323.49		-0.0683	-52	595	606	DSSMGAYMSSKK					Oxidation (M)[4,8]						Mascot
		1527.74	1527.65		-0.0966	-63	293	305	SLTNDWEDHLAVK											Mascot
		1527.74	1527.65		-0.0966	-63	293	305	SLTNDWEDHLAVK											Mascot
		1564.8	1564.64		-0.1556	-99	443	456	YHSTKSGNELTSLK											Mascot
	3	PREDICTED: hypothetical protein [Vitis vinifera]										gi|225426164		80801.1	5	11	84		99.759	30	0
		Peptide Information
		Calc. Mass		Obsrv. Mass	± da	± ppm	Start	End	Sequence			Ion	C. I. %	Modification					Rank	Result Type
							Seq.	Seq.				Score
		940.573	940.481		-0.0915	-97	268	274	QKPIWLR											Mascot
		941.476	941.458		-0.0185	-20	542	549	KSFESLCK											Mascot
		1081.53	1081.43		-0.1	-92	322	330	APFDLFDTR											Mascot
		1161.59	1161.48		-0.1103	-95	476	485	AVENSPFLER											Mascot
		1168.57	1168.46		-0.1065	-91	422	431	LGIHEDSQNR											Mascot
		1201.66	1201.55		-0.1121	-93	62	71	LDAQPELFIR											Mascot
		1237.63	1237.51		-0.1199	-97	321	330	RAPFDLFDTR			30	0							Mascot
		1237.63	1237.51		-0.1199	-97	321	330	RAPFDLFDTR											Mascot
		1289.68	1289.56		-0.1205	-93	475	485	KAVENSPFLER											Mascot
		1320.66	1320.53		-0.1235	-94	303	313	HFSVEGQLEFK											Mascot
		1323.56	1323.49		-0.0683	-52	597	608	DSSMGSYMSSKK					Oxidation (M)[4]						Mascot
		1541.76	1541.61		-0.1489	-97	290	302	SLTNDWEEHLAVK											Mascot
	4	heat shock protein 80 [Triticum aestivum]										gi|4204859		80333.9	5	10	83		99.697	30	0
		Peptide Information
		Calc. Mass		Obsrv. Mass	± da	± ppm	Start	End	Sequence			Ion	C. I. %	Modification					Rank	Result Type
							Seq.	Seq.				Score
		958.529	958.437		-0.092	-96	266	272	QKPIWMR											Mascot
		974.462	974.428		-0.034	-35	280	287	DEFAAFFK											Mascot
		1038.46	1038.5		0.0368	35	236	243	FEEIDEEK											Mascot
		1081.53	1081.43		-0.1	-92	320	328	APFDLFDTR											Mascot
		1201.66	1201.55		-0.1121	-93	58	67	LDAQPELFIR											Mascot
		1237.63	1237.51		-0.1199	-97	319	328	RAPFDLFDTR			30	0							Mascot
		1237.63	1237.51		-0.1199	-97	319	328	RAPFDLFDTR											Mascot
		1272.69	1272.57		-0.1248	-98	89	100	SDLVNNLATIGR											Mascot
		1320.66	1320.53		-0.1235	-94	301	311	HFSVEGQLEFK											Mascot
		1323.51	1323.49		-0.0199	-15	218	228	EISDDEDEDEK											Mascot
		1527.74	1527.65		-0.0966	-63	288	300	SLTNDWEEHLGVK											Mascot
		1527.74	1527.65		-0.0966	-63	288	300	SLTNDWEEHLGVK											Mascot
	5	heat shock protein, putative [Ricinus communis]										gi|223547557		80723.1	4.99	10	79		99.204	30	0
		Peptide Information
		Calc. Mass		Obsrv. Mass	± da	± ppm	Start	End	Sequence			Ion	C. I. %	Modification					Rank	Result Type
							Seq.	Seq.				Score
		940.573	940.481		-0.0915	-97	268	274	QKPIWLR											Mascot
		1081.53	1081.43		-0.1	-92	322	330	APFDLFDTR											Mascot
		1161.59	1161.48		-0.1103	-95	476	485	AVENSPFLER											Mascot
		1168.57	1168.46		-0.1065	-91	422	431	LGIHEDSQNR											Mascot
		1201.66	1201.55		-0.1121	-93	62	71	LDAQPELFIR											Mascot
		1237.63	1237.51		-0.1199	-97	321	330	RAPFDLFDTR			30	0							Mascot
		1237.63	1237.51		-0.1199	-97	321	330	RAPFDLFDTR											Mascot
		1289.68	1289.56		-0.1205	-93	475	485	KAVENSPFLER											Mascot
		1320.66	1320.53		-0.1235	-94	303	313	HFSVEGQLEFK											Mascot
		1323.61	1323.49		-0.1191	-90	185	194	EDQLEYLEER											Mascot
		1527.74	1527.65		-0.0966	-63	290	302	SLTNDWEDHLAVK											Mascot
		1527.74	1527.65		-0.0966	-63	290	302	SLTNDWEDHLAVK											Mascot
	6	RecName: Full=Heat shock protein 83										gi|1708314		80770.1	4.95	10	78		98.901	30	0
		Peptide Information
		Calc. Mass		Obsrv. Mass	± da	± ppm	Start	End	Sequence			Ion	C. I. %	Modification					Rank	Result Type
							Seq.	Seq.				Score
		940.573	940.481		-0.0915	-97	269	275	QKPIWLR											Mascot
		1081.53	1081.43		-0.1	-92	323	331	APFDLFDTR											Mascot
		1161.59	1161.48		-0.1103	-95	477	486	AVENSPFLER											Mascot
		1168.57	1168.46		-0.1065	-91	423	432	LGIHEDSQNR											Mascot
		1201.66	1201.55		-0.1121	-93	62	71	LDAQPELFIR											Mascot
		1237.63	1237.51		-0.1199	-97	322	331	RAPFDLFDTR			30	0							Mascot
		1237.63	1237.51		-0.1199	-97	322	331	RAPFDLFDTR											Mascot
		1289.68	1289.56		-0.1205	-93	476	486	KAVENSPFLER											Mascot
		1320.66	1320.53		-0.1235	-94	304	314	HFSVEGQLEFK											Mascot
		1323.61	1323.49		-0.1191	-90	185	194	EDQLEYLEER											Mascot
		1527.74	1527.65		-0.0966	-63	291	303	SLTNDWEDHLAVK											Mascot
		1527.74	1527.65		-0.0966	-63	291	303	SLTNDWEDHLAVK											Mascot
	7	unknown [Zea mays]										gi|223947771		81751.5	5.04	10	77		98.678	30	0
		Peptide Information
		Calc. Mass		Obsrv. Mass	± da	± ppm	Start	End	Sequence			Ion	C. I. %	Modification					Rank	Result Type
							Seq.	Seq.				Score
		940.573	940.481		-0.0915	-97	278	284	QKPIWLR											Mascot
		1081.53	1081.43		-0.1	-92	332	340	APFDLFDTR											Mascot
		1161.59	1161.48		-0.1103	-95	486	495	AVENSPFLER											Mascot
		1168.57	1168.46		-0.1065	-91	432	441	LGIHEDSQNR											Mascot
		1201.66	1201.55		-0.1121	-93	67	76	LDAQPELFIR											Mascot
		1237.63	1237.51		-0.1199	-97	331	340	RAPFDLFDTR			30	0							Mascot
		1237.63	1237.51		-0.1199	-97	331	340	RAPFDLFDTR											Mascot
		1272.69	1272.57		-0.1248	-98	98	109	SDLVNNLGTIAR											Mascot
		1289.68	1289.56		-0.1205	-93	485	495	KAVENSPFLER											Mascot
		1320.66	1320.53		-0.1235	-94	313	323	HFSVEGQLEFK											Mascot
		1527.74	1527.65		-0.0966	-63	300	312	SLTNDWEDHLAVK											Mascot
		1527.74	1527.65		-0.0966	-63	300	312	SLTNDWEDHLAVK											Mascot
	8	heat shock protein [Hevea brasiliensis]										gi|33326375		80094.8	5.02	10	76		98.447	30	0
		Peptide Information
		Calc. Mass		Obsrv. Mass	± da	± ppm	Start	End	Sequence			Ion	C. I. %	Modification					Rank	Result Type
							Seq.	Seq.				Score
		940.573	940.481		-0.0915	-97	263	269	QKPIWLR											Mascot
		1081.53	1081.43		-0.1	-92	317	325	APFDLFDTR											Mascot
		1161.59	1161.48		-0.1103	-95	471	480	AVENSPFLER											Mascot
		1168.57	1168.46		-0.1065	-91	417	426	LGIHEDSQNR											Mascot
		1201.66	1201.55		-0.1121	-93	57	66	LDAQPELFIR											Mascot
		1237.63	1237.51		-0.1199	-97	316	325	RAPFDLFDTR			30	0							Mascot
		1237.63	1237.51		-0.1199	-97	316	325	RAPFDLFDTR											Mascot
		1289.68	1289.56		-0.1205	-93	470	480	KAVENSPFLER											Mascot
		1320.66	1320.53		-0.1235	-94	298	308	HFSVEGQLEFK											Mascot
		1323.61	1323.49		-0.1191	-90	180	189	EDQLEYLEER											Mascot
		1527.74	1527.65		-0.0966	-63	285	297	SLTNDWEDHLAVK											Mascot
		1527.74	1527.65		-0.0966	-63	285	297	SLTNDWEDHLAVK											Mascot
	9	predicted protein [Populus trichocarpa]										gi|224077478		80669	5.01	9	72		96.275	30	0
		Peptide Information
		Calc. Mass		Obsrv. Mass	± da	± ppm	Start	End	Sequence			Ion	C. I. %	Modification					Rank	Result Type
							Seq.	Seq.				Score
		940.573	940.481		-0.0915	-97	268	274	QKPIWLR											Mascot
		1081.53	1081.43		-0.1	-92	322	330	APFDLFDTR											Mascot
		1168.57	1168.46		-0.1065	-91	422	431	LGIHEDSQNR											Mascot
		1201.66	1201.55		-0.1121	-93	62	71	LDAQPELFIR											Mascot
		1237.63	1237.51		-0.1199	-97	321	330	RAPFDLFDTR			30	0							Mascot
		1237.63	1237.51		-0.1199	-97	321	330	RAPFDLFDTR											Mascot
		1320.66	1320.53		-0.1235	-94	303	313	HFSVEGQLEFK											Mascot
		1323.61	1323.49		-0.1191	-90	185	194	EDQLEYLEER											Mascot
		1527.74	1527.65		-0.0966	-63	290	302	SLTNDWEDHLAVK											Mascot
		1527.74	1527.65		-0.0966	-63	290	302	SLTNDWEDHLAVK											Mascot
		1541.73	1541.61		-0.1233	-80	394	406	KCIEMFSEIAENK											Mascot
	10	heat shock protein 83										gi|166770		81023.1	4.95	10	71		95.201	30	0
		Peptide Information
		Calc. Mass		Obsrv. Mass	± da	± ppm	Start	End	Sequence			Ion	C. I. %	Modification					Rank	Result Type
							Seq.	Seq.				Score
		940.573	940.481		-0.0915	-97	270	276	QKPIWLR											Mascot
		1081.53	1081.43		-0.1	-92	324	332	APFDLFDTR											Mascot
		1161.59	1161.48		-0.1103	-95	478	487	AVENSPFLER											Mascot
		1168.57	1168.46		-0.1065	-91	424	433	LGIHEDSQNR											Mascot
		1237.63	1237.51		-0.1199	-97	323	332	RAPFDLFDTR			30	0							Mascot
		1237.63	1237.51		-0.1199	-97	323	332	RAPFDLFDTR											Mascot
		1289.68	1289.56		-0.1205	-93	477	487	KAVENSPFLER											Mascot
		1320.66	1320.53		-0.1235	-94	305	315	HFSVEGQLEFK											Mascot
		1323.56	1323.49		-0.0683	-52	599	610	DSSMSGYMSSKK					Oxidation (M)[4]						Mascot
		1527.7	1527.65		-0.053	-35	409	420	EDYTKFYEAFSK											Mascot
		1527.74	1527.65		-0.0966	-63	292	304	SLTNDWEDHLAVK											Mascot
Gel Idx/Pos			Spot #9						Instr./Gel Origin		AB4700/091116A					Process Status		Analysis Succeeded
Plate [#] Name			[1] 8912						Instrument Sample Name							Spectra		6
Rank		Protein Name						Species				Accession No.		Protein MW	Protein	Pep.		Protein	Protein	Total Ion	Total Ion
															PI	Count		Score	Score	Score	C. I. %
																			C. I. %
	1	catalase 2 [Elaeis guineensis]										gi|192910916		56922.4	6.47	11	100		99.994	25	0
		Peptide Information
		Calc. Mass		Obsrv. Mass	± da	± ppm	Start	End	Sequence			Ion	C. I. %	Modification					Rank	Result Type
							Seq.	Seq.				Score
		988.521	988.463		-0.0579	-59	103	110	FSTVIHER											Mascot
		988.521	988.463		-0.0579	-59	103	110	FSTVIHER											Mascot
		1024.52	1024.46		-0.0632	-62	450	458	WAESLGHPK											Mascot
		1070.53	1070.46		-0.0685	-64	345	353	VFAYADTQR											Mascot
		1118.54	1118.47		-0.0688	-62	164	171	SHIQEYWR			4	0							Mascot
		1118.54	1118.47		-0.0688	-62	164	171	SHIQEYWR											Mascot
		1127.58	1127.5		-0.0777	-69	111	120	GSPETIRDPR											Mascot
		1136.68	1136.6		-0.0778	-68	92	102	APGVQTPVIVR											Mascot
		1255.56	1255.47		-0.0887	-71	387	396	NEEVDYFPSR											Mascot
		1539.84	1539.72		-0.1231	-80	38	50	GPILLEDYHLIEK											Mascot
		1542.83	1542.7		-0.1309	-85	356	369	LGPNYLMLPVNAPK					Oxidation (M)[7]						Mascot
		1620.87	1620.74		-0.13	-80	292	305	TWPEDILPLQPVGR											Mascot
		1620.87	1620.74		-0.13	-80	292	305	TWPEDILPLQPVGR			25	0							Mascot
		2038.02	2037.83		-0.1863	-91	130	146	EGNWDLLGNNFPVFFIR											Mascot
	2	catalase 2 [Zantedeschia aethiopica]										gi|37594590		56946.3	7.01	8	68		89.257	25	0
		Peptide Information
		Calc. Mass		Obsrv. Mass	± da	± ppm	Start	End	Sequence			Ion	C. I. %	Modification					Rank	Result Type
							Seq.	Seq.				Score
		880.489	880.422		-0.0671	-76	216	223	AGKTNYVK											Mascot
		988.521	988.463		-0.0579	-59	103	110	FSTVIHER											Mascot
		988.521	988.463		-0.0579	-59	103	110	FSTVIHER											Mascot
		1127.58	1127.5		-0.0777	-69	111	120	GSPETIRDPR											Mascot
		1136.68	1136.6		-0.0778	-68	92	102	APGVQTPVIVR											Mascot
		1539.84	1539.72		-0.1231	-80	38	50	GPILLEDYHLIEK											Mascot
		1542.83	1542.7		-0.1309	-85	356	369	LGPNYLMLPVNAPK					Oxidation (M)[7]						Mascot
		1620.87	1620.74		-0.13	-80	292	305	TWPEDLLPLQPVGR											Mascot
		1620.87	1620.74		-0.13	-80	292	305	TWPEDLLPLQPVGR			25	0							Mascot
		2038.02	2037.83		-0.1863	-91	130	146	EGNWDLLGNNFPVFFIR											Mascot
	3	catalase [Hevea brasiliensis]										gi|12002676		56669	6.52	8	65		81.756	24	0
		Peptide Information
		Calc. Mass		Obsrv. Mass	± da	± ppm	Start	End	Sequence			Ion	C. I. %	Modification					Rank	Result Type
							Seq.	Seq.				Score
		988.521	988.463		-0.0579	-59	103	110	FSTVIHER											Mascot
		988.521	988.463		-0.0579	-59	103	110	FSTVIHER											Mascot
		1098.51	1098.56		0.0454	41	397	405	CDPVRHSER											Mascot
			1098.56																	Mascot
		1127.58	1127.5		-0.0777	-69	111	120	GSPETIRDPR											Mascot
		1136.68	1136.6		-0.0778	-68	92	102	APGVQTPVIVR											Mascot
		1255.56	1255.47		-0.0887	-71	387	396	DEEVNYFPSR											Mascot
		1539.84	1539.72		-0.1231	-80	38	50	GPILLEDYHLLEK											Mascot
		1620.72	1620.74		0.0233	14	269	281	LYIQTMDPDHEDK					Oxidation (M)[6]						Mascot
		1620.87	1620.74		-0.13	-80	292	305	TWPEDILPLQPVGR			25	0							Mascot
	4	putative catalase [Andrographis paniculata]										gi|67008247		32718.5	5.88	6	63		68.296	25	0
		Peptide Information
		Calc. Mass		Obsrv. Mass	± da	± ppm	Start	End	Sequence			Ion	C. I. %	Modification					Rank	Result Type
							Seq.	Seq.				Score
		988.521	988.463		-0.0579	-59	23	30	FSTVIHER											Mascot
		988.521	988.463		-0.0579	-59	23	30	FSTVIHER											Mascot
		1102.52	1102.48		-0.0406	-37	265	273	VFSYSDTQR											Mascot
		1127.58	1127.5		-0.0777	-69	31	40	GSPETLRDPR											Mascot
		1136.68	1136.6		-0.0778	-68	12	22	APGVQTPVIVR											Mascot
		1309.66	1309.58		-0.0755	-58	1	11	ISNLTCADFLR					Carbamidomethyl (C)[6]						Mascot
		1620.87	1620.74		-0.13	-80	212	225	TWPEDILPLQPVGR											Mascot
		1620.87	1620.74		-0.13	-80	212	225	TWPEDILPLQPVGR			25	0							Mascot
	5	unknown [Zea mays]										gi|194699594		25256.4	11.73	8	62		63.599
		Peptide Information
		Calc. Mass		Obsrv. Mass	± da	± ppm	Start	End	Sequence			Ion	C. I. %	Modification					Rank	Result Type
							Seq.	Seq.				Score
		991.56	991.49		-0.0707	-71	48	56	LIATSLMAR					Oxidation (M)[7]						Mascot
		1000.51	1000.44		-0.0716	-72	1	8	MLLSPHMR					Oxidation (M)[1]						Mascot
		1024.5	1024.46		-0.0453	-44	85	95	EAGGAGRHGGR											Mascot
		1070.52	1070.46		-0.0645	-60	111	121	EEAPGVQAGGR											Mascot
		1097.6	1097.57		-0.0251	-23	148	157	QEGELLVPGR											Mascot
		1111.57	1111.53		-0.0462	-42	122	134	RPGAQGGGAAGGR											Mascot
		1253.7	1253.65		-0.0483	-39	147	157	RQEGELLVPGR											Mascot
		2211.05	2210.89		-0.1567	-71	28	47	VTVTPEQEHPSLPPCSY					Carbamidomethyl (C)[15]						Mascot
									GGR
		2211.05	2210.89		-0.1567	-71	28	47	VTVTPEQEHPSLPPCSY					Carbamidomethyl (C)[15]						Mascot
									GGR
	6	catalase [Prunus avium]										gi|121078773		57033.6	7.09	7	60		35.268	25	0
		Peptide Information
							Start	End				Ion
		Calc. Mass		Obsrv. Mass	± da	± ppm			Sequence				C. I. %	Modification					Rank	Result Type
							Seq.	Seq.				Score
		988.521	988.463		-0.0579	-59	103	110	FSTVIHER											Mascot
		988.521	988.463		-0.0579	-59	103	110	FSTVIHER											Mascot
		1127.58	1127.5		-0.0777	-69	111	120	GSPETLRDPR											Mascot
		1136.68	1136.6		-0.0778	-68	92	102	APGVQTPVIVR											Mascot
		1142.57	1142.52		-0.0506	-44	397	405	YDPVRHAER											Mascot
		1255.56	1255.47		-0.0887	-71	387	396	DEEVNYFPSR											Mascot
		1620.87	1620.74		-0.13	-80	292	305	TWPEDILPLQPVGR											Mascot
		1620.87	1620.74		-0.13	-80	292	305	TWPEDILPLQPVGR			25	0							Mascot
		2210.88	2210.89		0.0118	5	370	386	CPHHNNHQDGFMNFMH					Carbamidomethyl (C)[1], Oxidation (M)[12,15]						Mascot
									R
		2210.88	2210.89		0.0118	5	370	386	CPHHNNHQDGFMNFMH					Carbamidomethyl (C)[1], Oxidation (M)[12,15]						Mascot
									R
	7	AT4G35090 [Arabidopsis thaliana]										gi|222423086		54990.2	6.34	7	60		33.761	25	0
		Peptide Information
		Calc. Mass		Obsrv. Mass	± da	± ppm	Start	End	Sequence			Ion	C. I. %	Modification					Rank	Result Type
							Seq.	Seq.				Score
		890.476	890.439		-0.0373	-42	418	424	ERCIIEK											Mascot
		988.521	988.463		-0.0579	-59	103	110	FSTVIHER											Mascot
		988.521	988.463		-0.0579	-59	103	110	FSTVIHER											Mascot
		1045.55	1045.49		-0.0636	-61	234	242	SLLEEDAIR											Mascot
		1127.58	1127.5		-0.0777	-69	111	120	GSPETLRDPR											Mascot
		1136.68	1136.6		-0.0778	-68	92	102	APGVQTPVIVR											Mascot
		1255.56	1255.47		-0.0887	-71	387	396	DEEVNYFPSR											Mascot
		1620.87	1620.74		-0.13	-80	292	305	TWPEDILPLQPVGR											Mascot
		1620.87	1620.74		-0.13	-80	292	305	TWPEDILPLQPVGR			25	0							Mascot
	8	catalase [Populus trichocarpa]										gi|224065685		56603.2	6.76	7	59		23.947	25	0
		Peptide Information
		Calc. Mass		Obsrv. Mass	± da	± ppm	Start	End	Sequence			Ion	C. I. %	Modification					Rank	Result Type
							Seq.	Seq.				Score
		988.521	988.463		-0.0579	-59	103	110	FSTVIHER											Mascot
		988.521	988.463		-0.0579	-59	103	110	FSTVIHER											Mascot
		1019.51	1019.45		-0.0603	-59	234	242	CLLEDEAVK											Mascot
		1127.58	1127.5		-0.0777	-69	111	120	GSPETLRDPR											Mascot
		1136.68	1136.6		-0.0778	-68	92	102	APGVQTPVIVR											Mascot
		1255.56	1255.47		-0.0887	-71	387	396	DEEVNYFPSR											Mascot
		1539.76	1539.72		-0.0439	-29	402	416	HAESFPIPPAVCSGK											Mascot
		1620.87	1620.74		-0.13	-80	292	305	TWPEDILPLQPVGR											Mascot
		1620.87	1620.74		-0.13	-80	292	305	TWPEDILPLQPVGR			25	0							Mascot
	9	catalase [Raphanus sativus]										gi|7302765		56680.2	6.63	7	59		20.363	25	0
		Peptide Information
		Calc. Mass		Obsrv. Mass	± da	± ppm	Start	End	Sequence			Ion	C. I. %	Modification					Rank	Result Type
							Seq.	Seq.				Score
		890.476	890.439		-0.0373	-42	417	423	ERCIIEK											Mascot
		988.521	988.463		-0.0579	-59	102	109	FSTVIHER											Mascot
		988.521	988.463		-0.0579	-59	102	109	FSTVIHER											Mascot
		1045.55	1045.49		-0.0636	-61	233	241	SLLEEDAIR											Mascot
		1127.58	1127.5		-0.0777	-69	110	119	GSPETLRDPR											Mascot
		1136.68	1136.6		-0.0778	-68	91	101	APGVQTPVIVR											Mascot
		1255.56	1255.47		-0.0887	-71	386	395	DEEVNYFPSR											Mascot
		1620.87	1620.74		-0.13	-80	291	304	TWPEDLLPLQPVGR											Mascot
		1620.87	1620.74		-0.13	-80	291	304	TWPEDLLPLQPVGR			25	0							Mascot
	10	catalase										gi|444340		56907.4	6.63	7	59		18.508	25	0
		Peptide Information
		Calc. Mass		Obsrv. Mass	± da	± ppm	Start	End	Sequence			Ion	C. I. %	Modification					Rank	Result Type
							Seq.	Seq.				Score
		890.476	890.439		-0.0373	-42	418	424	ERCIIEK											Mascot
		988.521	988.463		-0.0579	-59	103	110	FSTVIHER											Mascot
		988.521	988.463		-0.0579	-59	103	110	FSTVIHER											Mascot
		1045.55	1045.49		-0.0636	-61	234	242	SLLEEDAIR											Mascot
		1127.58	1127.5		-0.0777	-69	111	120	GSPETLRDPR											Mascot
		1136.68	1136.6		-0.0778	-68	92	102	APGVQTPVIVR											Mascot
		1255.56	1255.47		-0.0887	-71	387	396	DEEVNYFPSR											Mascot
		1620.87	1620.74		-0.13	-80	292	305	TWPEDILPLQPVGR											Mascot
		1620.87	1620.74		-0.13	-80	292	305	TWPEDILPLQPVGR			25	0							Mascot
Gel Idx/Pos			Spot #13						Instr./Gel Origin		AB4700/091116A					Process Status		Analysis Succeeded
Plate [#] Name			[1] 8912						Instrument Sample Name							Spectra		6
Rank		Protein Name						Species				Accession No.		Protein MW	Protein	Pep.		Protein	Protein	Total Ion	Total Ion
															PI	Count		Score	Score	Score	C. I. %
																			C. I. %
	1	unknown [Zea mays]										gi|224031021		68403.8	5.36	15	256		100	137	100
		Peptide Information
		Calc. Mass		Obsrv. Mass	± da	± ppm	Start	End	Sequence			Ion	C. I. %	Modification					Rank	Result Type
							Seq.	Seq.				Score
		883.467	883.41		-0.0575	-65	576	582	LGDLFYR			12	0							Mascot
		883.467	883.41		-0.0575	-65	576	582	LGDLFYR											Mascot
		885.446	885.385		-0.0616	-70	383	389	LASFYER											Mascot
		906.468	906.397		-0.0705	-78	114	121	SGDVYIPR											Mascot
		986.483	986.395		-0.0874	-89	461	468	ALESFYEK											Mascot
		1002.45	1002.38		-0.0678	-68	16	23	ESEYGYVR											Mascot
		1137.56	1137.46		-0.0939	-83	469	477	FDPDFIDIR			30	0							Mascot
		1137.56	1137.46		-0.0939	-83	469	477	FDPDFIDIR											Mascot
		1255.7	1255.59		-0.1077	-86	221	232	LAADTPLLTGQR											Mascot
		1335.74	1335.63		-0.1059	-79	46	57	VGHDNLIGEIIR			78	99.997							Mascot
		1335.74	1335.63		-0.1059	-79	46	57	VGHDNLIGEIIR											Mascot
		1545.81	1545.67		-0.1354	-88	310	324	TTLVANTSNMPVAAR											Mascot
		1733.87	1733.73		-0.1412	-81	325	339	EASIYTGITIAEYFR			29	0							Mascot
		1733.87	1733.73		-0.1412	-81	325	339	EASIYTGITIAEYFR											Mascot
		1795.87	1795.72		-0.1478	-82	366	382	LAEMPADSGYPAYLAAR											Mascot
		1811.86	1811.71		-0.1554	-86	366	382	LAEMPADSGYPAYLAAR					Oxidation (M)[4]						Mascot
		2057.03	2056.85		-0.1858	-90	515	531	LLREDYLAQNAFTPYDK											Mascot
		2078.04	2077.86		-0.1783	-86	25	45	VSGPVVVADGMGGAAM											Mascot
									YELVR
		2094.04	2093.85		-0.1833	-88	25	45	VSGPVVVADGMGGAAM					Oxidation (M)[11]						Mascot
									YELVR
		2097.12	2096.92		-0.2029	-97	482	499	EVLQREDDLNEIVQLVGK											Mascot
		2720.34	2720.1		-0.2458	-90	58	82	LEGDSATIQVYEETAGLM											Mascot
									VNDPVLR
		2736.34	2736.1		-0.2419	-88	58	82	LEGDSATIQVYEETAGLM					Oxidation (M)[18]						Mascot
									VNDPVLR
	2	RecName: Full=V-type proton ATPase catalytic subunit										gi|137460		68791.9	5.29	17	250		100	107	100
		A; Short=V-ATPase subunit A; AltName: Full=Vac
		Peptide Information
		Calc. Mass		Obsrv. Mass	± da	± ppm	Start	End	Sequence			Ion	C. I. %	Modification					Rank	Result Type
							Seq.	Seq.				Score
		883.467	883.41		-0.0575	-65	578	584	LGDLFYR			12	0							Mascot
		883.467	883.41		-0.0575	-65	578	584	LGDLFYR											Mascot
		885.446	885.385		-0.0616	-70	385	391	LASFYER											Mascot
		906.468	906.397		-0.0705	-78	116	123	SGDVYIPR											Mascot
		1002.45	1002.38		-0.0678	-68	18	25	ESEYGYVR											Mascot
		1255.7	1255.59		-0.1077	-86	223	234	LAADTPLLTGQR											Mascot
		1335.74	1335.63		-0.1059	-79	48	59	VGHDNLIGEIIR			78	99.997							Mascot
		1335.74	1335.63		-0.1059	-79	48	59	VGHDNLIGEIIR											Mascot
		1377.73	1377.61		-0.1167	-85	191	202	DTVLELEFQGVK											Mascot
		1406.73	1406.61		-0.1154	-82	204	214	QFTMLQTWPVR											Mascot
		1422.72	1422.6		-0.1174	-83	204	214	QFTMLQTWPVR					Oxidation (M)[4]						Mascot
		1545.81	1545.67		-0.1354	-88	312	326	TTLVANTSNMPVAAR											Mascot
		1705.75	1705.61		-0.1391	-82	268	282	YSNSDTVVYVGCGER					Carbamidomethyl (C)[12]						Mascot
		1733.87	1733.73		-0.1412	-81	327	341	EASIYTGITIAEYFR			29	0							Mascot
		1733.87	1733.73		-0.1412	-81	327	341	EASIYTGITIAEYFR											Mascot
		1795.87	1795.72		-0.1478	-82	368	384	LAEMPADSGYPAYLAAR											Mascot
		1811.86	1811.71	1811.71	-0.1554	-86	368	384	LAEMPADSGYPAYLAAR					Oxidation (M)[4]						Mascot	Mascot
		2052.94	2052.76		-0.1751	-85	9	25	LTTFEDSEKESEYGYVR											Mascot
		2057.03	2056.85		-0.1858	-90	517	533	LLREDYLAQNAFTPYDK											Mascot
		2078.04	2077.86		-0.1783	-86	27	47	VSGPVVVADGMGGAAM											Mascot
									YELVR
		2094.04	2093.85		-0.1833	-88	27	47	VSGPVVVADGMGGAAM					Oxidation (M)[11]						Mascot
									YELVR
		2097.12	2096.92		-0.2029	-97	484	501	EVLQREDDLNEIVQLVGK											Mascot
		2720.34	2720.1		-0.2458	-90	60	84	LEGDSATIQVYEETAGLM											Mascot
									VNDPVLR
		2736.34	2736.1		-0.2419	-88	60	84	LEGDSATIQVYEETAGLM					Oxidation (M)[18]						Mascot
									VNDPVLR
	3	predicted protein [Populus trichocarpa]										gi|224109966		68656.9	5.4	16	233		100	107	100
		Peptide Information
		Calc. Mass		Obsrv. Mass	± da	± ppm	Start	End	Sequence			Ion	C. I. %	Modification					Rank	Result Type
							Seq.	Seq.				Score
		883.467	883.41		-0.0575	-65	578	584	LGDLFYR			12	0							Mascot
		883.467	883.41		-0.0575	-65	578	584	LGDLFYR											Mascot
		885.446	885.385		-0.0616	-70	385	391	LASFYER											Mascot
		1002.45	1002.38		-0.0678	-68	18	25	ESEYGYVR											Mascot
		1045.55	1045.48		-0.0681	-65	395	403	VKCLGSPER					Carbamidomethyl (C)[3]						Mascot
		1255.7	1255.59		-0.1077	-86	223	234	LAADTPLLTGQR											Mascot
		1335.74	1335.63		-0.1059	-79	48	59	VGHDNLIGEIIR			78	99.997							Mascot
		1335.74	1335.63		-0.1059	-79	48	59	VGHDNLIGEIIR											Mascot
		1377.73	1377.61		-0.1167	-85	191	202	DTVLELEFQGVK											Mascot
		1406.73	1406.61		-0.1154	-82	204	214	QFTMLQTWPVR											Mascot
		1422.72	1422.6		-0.1174	-83	204	214	QFTMLQTWPVR					Oxidation (M)[4]						Mascot
		1545.81	1545.67		-0.1354	-88	312	326	TTLVANTSNMPVAAR											Mascot
		1583.81	1583.76		-0.0448	-28	561	575	GAGMDGQKISYSLIK					Oxidation (M)[4]						Mascot
		1705.75	1705.61		-0.1391	-82	268	282	YSNSDTVVYVGCGER					Carbamidomethyl (C)[12]						Mascot
		1733.87	1733.73		-0.1412	-81	327	341	EASIYTGITIAEYFR			29	0							Mascot
		1733.87	1733.73		-0.1412	-81	327	341	EASIYTGITIAEYFR											Mascot
		1795.87	1795.72		-0.1478	-82	368	384	LAEMPADSGYPAYLAAR											Mascot
		1811.86	1811.71		-0.1554	-86	368	384	LAEMPADSGYPAYLAAR					Oxidation (M)[4]						Mascot
		2052.94	2052.76		-0.1751	-85	9	25	LTTFEDSEKESEYGYVR											Mascot
		2057.03	2056.85		-0.1858	-90	517	533	LLREDYLAQNAFTPYDK											Mascot
		2097.12	2096.92		-0.2029	-97	484	501	EVLQREDDLNEIVQLVGK											Mascot
	4	RecName: Full=V-type proton ATPase catalytic subunit										gi|401322		68478.9	5.36	15	224		100	107	100
		A; Short=V-ATPase subunit A; AltName: Full=Vac
		Peptide Information
		Calc. Mass		Obsrv. Mass	± da	± ppm	Start	End	Sequence			Ion	C. I. %	Modification					Rank	Result Type
							Seq.	Seq.				Score
		883.467	883.41		-0.0575	-65	578	584	LGDLFYR			12	0							Mascot
		883.467	883.41		-0.0575	-65	578	584	LGDLFYR											Mascot
		885.446	885.385		-0.0616	-70	385	391	LASFYER											Mascot
		906.468	906.397		-0.0705	-78	116	123	SGDVYIPR											Mascot
		1002.45	1002.38		-0.0678	-68	18	25	ESEYGYVR											Mascot
		1255.7	1255.59		-0.1077	-86	223	234	LAADTPLLTGQR											Mascot
		1335.74	1335.63		-0.1059	-79	48	59	VGHDNLIGEIIR			78	99.997							Mascot
		1335.74	1335.63		-0.1059	-79	48	59	VGHDNLIGEIIR											Mascot
		1377.73	1377.61		-0.1167	-85	191	202	DTVLELEFQGVK											Mascot
		1406.73	1406.61		-0.1154	-82	204	214	QFTMLQTWPVR											Mascot
		1422.72	1422.6		-0.1174	-83	204	214	QFTMLQTWPVR					Oxidation (M)[4]						Mascot
		1545.81	1545.67		-0.1354	-88	312	326	TTLVANTSNMPVAAR											Mascot
		1733.87	1733.73		-0.1412	-81	327	341	EASIYTGITIAEYFR			29	0							Mascot
		1733.87	1733.73		-0.1412	-81	327	341	EASIYTGITIAEYFR											Mascot
		1795.87	1795.72		-0.1478	-82	368	384	LAEMPADSGYPAYLAAR											Mascot
		1811.86	1811.71		-0.1554	-86	368	384	LAEMPADSGYPAYLAAR					Oxidation (M)[4]						Mascot
		2052.94	2052.76		-0.1751	-85	9	25	LTTFEDSEKESEYGYVR											Mascot
		2057.03	2056.85		-0.1858	-90	517	533	LLREDYLAQNAFTPYDK											Mascot
		2097.12	2096.92		-0.2029	-97	484	501	EVLQREDDLNEIVQLVGK											Mascot
		2720.34	2720.1		-0.2458	-90	60	84	LEGDSATIQVYEETAGLM											Mascot
									VNDPVLR
		2736.34	2736.1		-0.2419	-88	60	84	LEGDSATIQVYEETAGLM					Oxidation (M)[18]						Mascot
									VNDPVLR
	5	vacuolar H+-ATPase [Malus x domestica]										gi|131573315		68876	5.37	15	223		100	107	100
		Peptide Information
		Calc. Mass		Obsrv. Mass	± da	± ppm	Start	End	Sequence			Ion	C. I. %	Modification					Rank	Result Type
							Seq.	Seq.				Score
		883.467	883.41		-0.0575	-65	578	584	LGDLFYR			12	0							Mascot
		883.467	883.41		-0.0575	-65	578	584	LGDLFYR											Mascot
		885.446	885.385		-0.0616	-70	385	391	LASFYER											Mascot
		906.468	906.397		-0.0705	-78	116	123	SGDVYIPR											Mascot
		1002.45	1002.38		-0.0678	-68	18	25	ESEYGYVR											Mascot
		1255.7	1255.59		-0.1077	-86	223	234	LAADTPLLTGQR											Mascot
		1335.74	1335.63		-0.1059	-79	48	59	VGHDNLIGEIIR			78	99.997							Mascot
		1335.74	1335.63		-0.1059	-79	48	59	VGHDNLIGEIIR											Mascot
		1406.72	1406.61		-0.1066	-76	191	202	DTVLELEFQGQK											Mascot
		1545.81	1545.67		-0.1354	-88	312	326	TTLVANTSNMPVAAR											Mascot
		1705.75	1705.61		-0.1391	-82	268	282	YSNSDTVVYVGCGER					Carbamidomethyl (C)[12]						Mascot
		1733.87	1733.73		-0.1412	-81	327	341	EASIYTGITIAEYFR			29	0							Mascot
		1733.87	1733.73		-0.1412	-81	327	341	EASIYTGITIAEYFR											Mascot
		1795.87	1795.72		-0.1478	-82	368	384	LAEMPADSGYPAYLAAR											Mascot
		1811.86	1811.71		-0.1554	-86	368	384	LAEMPADSGYPAYLAAR					Oxidation (M)[4]						Mascot
		2052.94	2052.76		-0.1751	-85	9	25	LTTFEDSEKESEYGYVR											Mascot
		2057.03	2056.85		-0.1858	-90	517	533	LLREDYLAQNAFTPYDK											Mascot
		2097.12	2096.92		-0.2029	-97	484	501	EVLQREDDLNEIVQLVGK											Mascot
		2720.34	2720.1		-0.2458	-90	60	84	LEGDSATIQVYEETAGLM											Mascot
									VNDPVLR
		2736.34	2736.1		-0.2419	-88	60	84	LEGDSATIQVYEETAGLM					Oxidation (M)[18]						Mascot
									VNDPVLR
	6	RecName: Full=V-type proton ATPase catalytic subunit										gi|12585490		68637.9	5.29	15	220		100	106	100
		A; Short=V-ATPase subunit A; AltName: Full=Vac
		Peptide Information
		Calc. Mass		Obsrv. Mass	± da	± ppm	Start	End	Sequence			Ion	C. I. %	Modification					Rank	Result Type
							Seq.	Seq.				Score
		883.467	883.41		-0.0575	-65	578	584	LGDLFYR			12	0							Mascot
		883.467	883.41		-0.0575	-65	578	584	LGDLFYR											Mascot
		885.446	885.385		-0.0616	-70	385	391	LASFYER											Mascot
		906.468	906.397		-0.0705	-78	116	123	SGDVYIPR											Mascot
		1002.45	1002.38		-0.0678	-68	18	25	ESEYGYVR											Mascot
		1255.7	1255.59		-0.1077	-86	223	234	LAADTPLLTGQR											Mascot
		1335.69	1335.63		-0.0559	-42	204	214	SFTMLQAWPVR											Mascot
		1335.74	1335.63		-0.1059	-79	48	59	VGHDNLIGEIIR			78	99.997							Mascot
		1377.73	1377.61		-0.1167	-85	191	202	DTVLELEFQGVK											Mascot
		1545.81	1545.67		-0.1354	-88	312	326	TTLVANTSNMPVAAR											Mascot
		1705.75	1705.61		-0.1391	-82	268	282	YSNSDTVVYVGCGER					Carbamidomethyl (C)[12]						Mascot
		1733.87	1733.73		-0.1412	-81	327	341	EASIYTGITIAEYFR			29	0							Mascot
		1733.87	1733.73		-0.1412	-81	327	341	EASIYTGITIAEYFR											Mascot
		1795.87	1795.72		-0.1478	-82	368	384	LAEMPADSGYPAYLAAR											Mascot
		1811.86	1811.71		-0.1554	-86	368	384	LAEMPADSGYPAYLAAR					Oxidation (M)[4]						Mascot
		2057.03	2056.85		-0.1858	-90	517	533	LLREDYLAQNAFTPYDK											Mascot
		2097.12	2096.92		-0.2029	-97	484	501	EVLQREDDLNEIVQLVGK											Mascot
		2720.34	2720.1		-0.2458	-90	60	84	LEGDSATIQVYEETAGLM											Mascot
			2720.1																	Mascot
									VNDPVLR
		2736.34	2736.1		-0.2419	-88	60	84	LEGDSATIQVYEETAGLM					Oxidation (M)[18]						Mascot
									VNDPVLR
	7	vacuolar H+-ATPase catalytic subunit [Gossypium										gi|3169287		68490.9	5.36	14	213		100	107	100
		hirsutum]
		Peptide Information
		Calc. Mass		Obsrv. Mass	± da	± ppm	Start	End	Sequence			Ion	C. I. %	Modification					Rank	Result Type
							Seq.	Seq.				Score
		883.467	883.41		-0.0575	-65	578	584	LGDLFYR			12	0							Mascot
		883.467	883.41		-0.0575	-65	578	584	LGDLFYR											Mascot
		885.446	885.385		-0.0616	-70	385	391	LASFYER											Mascot
		906.468	906.397		-0.0705	-78	116	123	SGDVYIPR											Mascot
		986.458	986.395		-0.0623	-63	18	25	ESEFGYVR											Mascot
		1255.7	1255.59		-0.1077	-86	223	234	LAADTPLLTGQR											Mascot
		1335.74	1335.63		-0.1059	-79	48	59	VGHDNLIGEIIR			78	99.997							Mascot
		1335.74	1335.63		-0.1059	-79	48	59	VGHDNLIGEIIR											Mascot
		1377.73	1377.61		-0.1167	-85	191	202	DTVLELEFQGVK											Mascot
		1406.73	1406.61		-0.1154	-82	204	214	QFTMLQTWPVR											Mascot
		1422.72	1422.6		-0.1174	-83	204	214	QFTMLQTWPVR					Oxidation (M)[4]						Mascot
		1545.81	1545.67		-0.1354	-88	312	326	TTLVANTSNMPVAAR											Mascot
		1733.87	1733.73		-0.1412	-81	327	341	EASIYTGITIAEYFR			29	0							Mascot
		1733.87	1733.73		-0.1412	-81	327	341	EASIYTGITIAEYFR											Mascot
		1795.87	1795.72		-0.1478	-82	368	384	LAEMPADSGYPAYLAAR											Mascot
		1811.86	1811.71		-0.1554	-86	368	384	LAEMPADSGYPAYLAAR					Oxidation (M)[4]						Mascot
		2057.03	2056.85		-0.1858	-90	517	533	LLREDYLAQNAFTPYDK											Mascot
		2097.12	2096.92		-0.2029	-97	484	501	EVLQREDDLNEIVQLVGK											Mascot
		2720.34	2720.1		-0.2458	-90	60	84	LEGDSATIQVYEETAGLM											Mascot
									VNDPVLR
		2736.34	2736.1		-0.2419	-88	60	84	LEGDSATIQVYEETAGLM					Oxidation (M)[18]						Mascot
									VNDPVLR
	8	vacuolar H+-ATPase A2 subunit isoform; V-ATPase A2										gi|27884018		68670.9	5.3	14	212		100	107	100
		subunit isoform [Lycopersicon esculentum]
		Peptide Information
		Calc. Mass		Obsrv. Mass	± da	± ppm	Start	End	Sequence			Ion	C. I. %	Modification					Rank	Result Type
							Seq.	Seq.				Score
		883.467	883.41		-0.0575	-65	578	584	LGDLFYR			12	0							Mascot
		883.467	883.41		-0.0575	-65	578	584	LGDLFYR											Mascot
		885.446	885.385		-0.0616	-70	385	391	LASFYER											Mascot
		906.468	906.397		-0.0705	-78	116	123	SGDVYIPR											Mascot
			906.397																	Mascot
		1002.45	1002.38		-0.0678	-68	18	25	ESEYGYVR											Mascot
		1255.7	1255.59		-0.1077	-86	223	234	LAADTPLLTGQR											Mascot
		1335.74	1335.63		-0.1059	-79	48	59	VGHDNLIGEIIR			78	99.997							Mascot
		1335.74	1335.63		-0.1059	-79	48	59	VGHDNLIGEIIR											Mascot
		1377.73	1377.61		-0.1167	-85	191	202	DTVLELEFQGVK											Mascot
		1545.81	1545.67		-0.1354	-88	312	326	TTLVANTSNMPVAAR											Mascot
		1705.75	1705.61		-0.1391	-82	268	282	YSNSDTVVYVGCGER					Carbamidomethyl (C)[12]						Mascot
		1733.87	1733.73		-0.1412	-81	327	341	EASIYTGITIAEYFR			29	0							Mascot
		1733.87	1733.73		-0.1412	-81	327	341	EASIYTGITIAEYFR											Mascot
		1795.87	1795.72		-0.1478	-82	368	384	LAEMPADSGYPAYLAAR											Mascot
		1811.86	1811.71		-0.1554	-86	368	384	LAEMPADSGYPAYLAAR					Oxidation (M)[4]						Mascot
		2057.03	2056.85		-0.1858	-90	517	533	LLREDYLAQNAFTPYDK											Mascot
		2097.12	2096.92		-0.2029	-97	484	501	EVLQREDDLNEIVQLVGK											Mascot
		2720.34	2720.1		-0.2458	-90	60	84	LEGDSATIQVYEETAGLM											Mascot
									VNDPVLR
		2736.34	2736.1		-0.2419	-88	60	84	LEGDSATIQVYEETAGLM					Oxidation (M)[18]						Mascot
									VNDPVLR
	9	predicted protein [Populus trichocarpa]										gi|224097420		68575.8	5.39	14	211		100	107	100
		Peptide Information
		Calc. Mass		Obsrv. Mass	± da	± ppm	Start	End	Sequence			Ion	C. I. %	Modification					Rank	Result Type
							Seq.	Seq.				Score
		883.467	883.41		-0.0575	-65	578	584	LGDLFYR			12	0							Mascot
		883.467	883.41		-0.0575	-65	578	584	LGDLFYR											Mascot
		885.446	885.385		-0.0616	-70	385	391	LASFYER											Mascot
		1002.45	1002.38		-0.0678	-68	18	25	ESEYGYVR											Mascot
		1045.55	1045.48		-0.0681	-65	395	403	VKCLGSPER					Carbamidomethyl (C)[3]						Mascot
		1255.7	1255.59		-0.1077	-86	223	234	LAADTPLLTGQR											Mascot
		1335.74	1335.63		-0.1059	-79	48	59	VGHDNLIGEIIR			78	99.997							Mascot
		1335.74	1335.63		-0.1059	-79	48	59	VGHDNLIGEIIR											Mascot
		1406.73	1406.61		-0.1154	-82	204	214	QFTMLQTWPVR											Mascot
		1422.72	1422.6		-0.1174	-83	204	214	QFTMLQTWPVR					Oxidation (M)[4]						Mascot
		1545.81	1545.67		-0.1354	-88	312	326	TTLVANTSNMPVAAR											Mascot
		1705.75	1705.61		-0.1391	-82	268	282	YSNSDTVVYVGCGER					Carbamidomethyl (C)[12]						Mascot
		1733.87	1733.73		-0.1412	-81	327	341	EASIYTGITIAEYFR			29	0							Mascot
		1733.87	1733.73		-0.1412	-81	327	341	EASIYTGITIAEYFR											Mascot
		1795.87	1795.72		-0.1478	-82	368	384	LAEMPADSGYPAYLAAR											Mascot
		1811.86	1811.71		-0.1554	-86	368	384	LAEMPADSGYPAYLAAR					Oxidation (M)[4]						Mascot
		2052.94	2052.76		-0.1751	-85	9	25	LTTFEDSEKESEYGYVR											Mascot
		2057.03	2056.85		-0.1858	-90	517	533	LLREDYLAQNAFTPYDK											Mascot
		2097.12	2096.92		-0.2029	-97	484	501	EVLQREDDLNEIVQLVGK											Mascot
	10	vacuolar H+-ATPase A1 subunit isoform; V-ATPase A1										gi|27883932		68526.9	5.2	13	204		100	107	100
		subunit isoform [Lycopersicon esculentum]
		Peptide Information
		Calc. Mass		Obsrv. Mass	± da	± ppm	Start	End	Sequence			Ion	C. I. %	Modification					Rank	Result Type
							Seq.	Seq.				Score
		883.467	883.41		-0.0575	-65	578	584	LGDLFYR			12	0							Mascot
		883.467	883.41		-0.0575	-65	578	584	LGDLFYR											Mascot
		885.446	885.385		-0.0616	-70	385	391	LASFYER											Mascot
		906.468	906.397		-0.0705	-78	116	123	SGDVYIPR											Mascot
		1255.7	1255.59		-0.1077	-86	223	234	LAADTPLLTGQR											Mascot
		1335.74	1335.63		-0.1059	-79	48	59	VGHDNLIGEIIR			78	99.997							Mascot
		1335.74	1335.63		-0.1059	-79	48	59	VGHDNLIGEIIR											Mascot
		1545.81	1545.67		-0.1354	-88	312	326	TTLVANTSNMPVAAR											Mascot
		1705.75	1705.61		-0.1391	-82	268	282	YSNSDTVVYVGCGER					Carbamidomethyl (C)[12]						Mascot
		1733.87	1733.73		-0.1412	-81	327	341	EASIYTGITIAEYFR			29	0							Mascot
		1733.87	1733.73		-0.1412	-81	327	341	EASIYTGITIAEYFR											Mascot
		1795.87	1795.72		-0.1478	-82	368	384	LAEMPADSGYPAYLAAR											Mascot
		1811.86	1811.71		-0.1554	-86	368	384	LAEMPADSGYPAYLAAR					Oxidation (M)[4]						Mascot
		2057.03	2056.85		-0.1858	-90	517	533	LLREDYLAQNAFTPYDK											Mascot
		2078.04	2077.86		-0.1783	-86	27	47	VSGPVVVADGMGGAAM											Mascot
									YELVR
		2094.04	2093.85		-0.1833	-88	27	47	VSGPVVVADGMGGAAM					Oxidation (M)[11]						Mascot
									YELVR
		2097.12	2096.92		-0.2029	-97	484	501	EVLQREDDLNEIVQLVGK											Mascot
		2720.34	2720.1		-0.2458	-90	60	84	LEGDSATIQVYEETAGLM											Mascot
									VNDPVLR
		2736.34	2736.1		-0.2419	-88	60	84	LEGDSATIQVYEETAGLM					Oxidation (M)[18]						Mascot
									VNDPVLR
Gel Idx/Pos			Spot #21						Instr./Gel Origin		AB4700/091116A						Process Status		Analysis Succeeded
Plate [#] Name			[1] 8912						Instrument Sample Name								Spectra		6
Rank		Protein Name						Species				Accession No.			Protein MW	Protein	Pep.		Protein	Protein	Total Ion	Total Ion
																PI	Count		Score	Score	Score	C. I. %
																				C. I. %
	1	o-methyltransferase, putative [Ricinus communis]										gi|223540510			40000.3	5.33	4	92		99.955	68	99.941
		Peptide Information
		Calc. Mass		Obsrv. Mass	± da	± ppm	Start	End	Sequence			Ion	C. I. %		Modification					Rank	Result Type
							Seq.	Seq.				Score
		1076.61	1076.47		-0.135	-125	327	335	KEFEALALR												Mascot
		1738.8	1738.69		-0.108	-62	260	272	WILHDWSDEHCLK						Carbamidomethyl (C)[11]						Mascot
		1738.8	1738.69		-0.108	-62	260	272	WILHDWSDEHCLK			68	99.941		Carbamidomethyl (C)[11]						Mascot
		1816.89	1816.67		-0.2182	-120	1	16	MSNPNQEEETGKLAIR												Mascot
		2126.13	2125.84		-0.2947	-139	73	90	MLRLLASYDILNCSLVTK						Carbamidomethyl (C)[13], Oxidation (M)[1]						Mascot
	2	caffeic acid O-methyltransferase [Vanilla planifolia]										gi|45444737			40632.5	5.65	3	84		99.742	68	99.941
		Peptide Information
		Calc. Mass		Obsrv. Mass	± da	± ppm	Start	End	Sequence			Ion	C. I. %		Modification					Rank	Result Type
							Seq.	Seq.				Score
		874.493	874.473		-0.0198	-23	281	287	LLRNCAK						Carbamidomethyl (C)[5]						Mascot
		992.462	992.462		0.0002	0	107	115	SYGAAHVCK						Carbamidomethyl (C)[8]						Mascot
		992.462	992.462		0.0002	0	107	115	SYGAAHVCK						Carbamidomethyl (C)[8]						Mascot
		1738.8	1738.69		-0.108	-62	268	280	WILHDWSDEHCLK						Carbamidomethyl (C)[11]						Mascot
		1738.8	1738.69		-0.108	-62	268	280	WILHDWSDEHCLK			68	99.941		Carbamidomethyl (C)[11]						Mascot
	3	O-methyltransferase, family 2; Dimerisation [Medicago										gi|87240858			41378.9	5.62	2	77		98.738	68	99.941
		truncatula]
		Peptide Information
		Calc. Mass		Obsrv. Mass	± da	± ppm	Start	End	Sequence			Ion	C. I. %		Modification					Rank	Result Type
		Calc. Mass		Obsrv. Mass	± da	± ppm			Sequence				C. I. %		Modification					Rank	Result Type
							Seq.	Seq.				Score
		1738.8	1738.69		-0.108	-62	278	290	WILHDWSDEHCLK						Carbamidomethyl (C)[11]						Mascot
		1738.8	1738.69		-0.108	-62	278	290	WILHDWSDEHCLK			68	99.941		Carbamidomethyl (C)[11]						Mascot
		2125.95	2125.84		-0.1096	-52	324	342	TACMSDVLMMTQNPGG						Carbamidomethyl (C)[3]						Mascot
									KER
		2141.94	2141.83		-0.1179	-55	324	342	TACMSDVLMMTQNPGG						Carbamidomethyl (C)[3], Oxidation (M)[4]						Mascot
									KER
	4	hypothetical protein [Vitis vinifera]										gi|147788364			41263	5.4	2	77		98.678	68	99.941
		Peptide Information
		Calc. Mass		Obsrv. Mass	± da	± ppm	Start	End	Sequence			Ion	C. I. %		Modification					Rank	Result Type
							Seq.	Seq.				Score
		1738.8	1738.69		-0.108	-62	271	283	WILHDWSDEHCLK						Carbamidomethyl (C)[11]						Mascot
		1738.8	1738.69		-0.108	-62	271	283	WILHDWSDEHCLK			68	99.941		Carbamidomethyl (C)[11]						Mascot
		1816.93	1816.67		-0.2666	-147	123	139	NPDGGSIGPLFLLHHDK												Mascot
	5	O-methyltransferase [Hyacinthus orientalis]										gi|47026950			21138.6	5.97	1	74		97.174	68	99.941
		Peptide Information
		Calc. Mass		Obsrv. Mass	± da	± ppm	Start	End	Sequence			Ion	C. I. %		Modification					Rank	Result Type
							Seq.	Seq.				Score
		1738.8	1738.69		-0.108	-62	99	111	WILHDWSDEHCLK						Carbamidomethyl (C)[11]						Mascot
		1738.8	1738.69		-0.108	-62	99	111	WILHDWSDEHCLK			68	99.941		Carbamidomethyl (C)[11]						Mascot
	6	unnamed protein product [Vitis vinifera]										gi|157336049			23304.7	5.58	1	73		97.109	68	99.941
		Peptide Information
		Calc. Mass		Obsrv. Mass	± da	± ppm	Start	End	Sequence			Ion	C. I. %		Modification					Rank	Result Type
							Seq.	Seq.				Score
		1738.8	1738.69		-0.108	-62	107	119	WILHDWSDEHCLK						Carbamidomethyl (C)[11]						Mascot
		1738.8	1738.69		-0.108	-62	107	119	WILHDWSDEHCLK			68	99.941		Carbamidomethyl (C)[11]						Mascot
	7	unnamed protein product [Vitis vinifera]										gi|157349189			28330.1	5.69	1	73		96.756	68	99.941
		Peptide Information
		Calc. Mass		Obsrv. Mass	± da	± ppm	Start	End	Sequence			Ion	C. I. %		Modification					Rank	Result Type
							Seq.	Seq.				Score
		1738.8	1738.69		-0.108	-62	158	170	WILHDWSDEHCLK						Carbamidomethyl (C)[11]						Mascot
		1738.8	1738.69		-0.108	-62	158	170	WILHDWSDEHCLK			68	99.941		Carbamidomethyl (C)[11]						Mascot
	8	putative caffeic acid methyltransferase [Gossypium										gi|133902303			39222	5.52	1	72		96.275	68	99.941
		raimondii]
		Peptide Information
		Calc. Mass		Obsrv. Mass	± da	± ppm	Start	End	Sequence			Ion	C. I. %		Modification					Rank	Result Type
							Seq.	Seq.				Score
		1738.8	1738.69		-0.108	-62	257	269	WILHDWSDEHCLK						Carbamidomethyl (C)[11]						Mascot
		1738.8	1738.69		-0.108	-62	257	269	WILHDWSDEHCLK			68	99.941		Carbamidomethyl (C)[11]						Mascot
	9	hypothetical protein [Vitis vinifera]										gi|147804685			43517.6	5.36	1	72		96.188	68	99.941
		Peptide Information
		Calc. Mass		Obsrv. Mass	± da	± ppm	Start	End	Sequence			Ion	C. I. %		Modification					Rank	Result Type
							Seq.	Seq.				Score
		1738.8	1738.69		-0.108	-62	298	310	WILHDWSDEHCLK						Carbamidomethyl (C)[11]						Mascot
		1738.8	1738.69		-0.108	-62	298	310	WILHDWSDEHCLK			68	99.941		Carbamidomethyl (C)[11]						Mascot
	10	RecName: Full=Bowman-Birk type trypsin inhibitor										gi|729798			7953.1	4.97	6	52		0
		Peptide Information
		Calc. Mass		Obsrv. Mass	± da	± ppm	Start	End	Sequence			Ion	C. I. %		Modification					Rank	Result Type
							Seq.	Seq.				Score
		1076.46	1076.47		0.0137	13	33	41	LNSCHSACK						Carbamidomethyl (C)[4,8]						Mascot
		1255.56	1255.54		-0.0239	-19	42	52	SCICTRSMPGK						Carbamidomethyl (C)[2], Oxidation (M)[8]						Mascot
		2142.81	2142.86		0.0432	20	55	71	CLDTDDFCYKPCESMDK						Carbamidomethyl (C)[1,8], Oxidation (M)[15]						Mascot
		2158.73	2158.85		0.1206	56	1	20	SHDEPSESSEPCCDSCD												Mascot
									CTK
		2283.02	2283.03		0.0068	3	21	41	SIPPECHCANIRLNSCHS												Mascot
									ACK
		2499.97	2500.07		0.1008	40	53	71	CRCLDTDDFCYKPCESM						Carbamidomethyl (C)[1,3,10,14]						Mascot
									DK
Gel Idx/Pos			Spot #22						Instr./Gel Origin		AB4700/091116A					Process Status		Analysis Succeeded
Plate [#] Name			[1] 8912						Instrument Sample Name							Spectra		6
Rank		Protein Name						Species				Accession No.		Protein MW	Protein	Pep.		Protein	Protein	Total Ion	Total Ion
															PI	Count		Score	Score	Score	C. I. %
																			C. I. %
	1	PREDICTED: hypothetical protein [Vitis vinifera]										gi|225441455		41689.9	5.31	16	383		100	258	100
		Peptide Information
		Calc. Mass		Obsrv. Mass	± da	± ppm	Start	End	Sequence			Ion	C. I. %	Modification					Rank	Result Type
							Seq.	Seq.				Score
		890.476	890.459		-0.0175	-20	209	215	EIVRDMK											Mascot
		895.536	895.487		-0.0491	-55	331	338	VVAPPERK											Mascot
		906.46	906.416		-0.0438	-48	186	193	DLTDALMK											Mascot
		976.448	976.401		-0.0475	-49	21	30	AGFAGDDAPR											Mascot
		1132.53	1132.47		-0.0586	-52	199	208	GYSFTTTAER			22	0							Mascot
		1132.53	1132.47		-0.0586	-52	199	208	GYSFTTTAER											Mascot
		1144.56	1144.5		-0.0595	-52	42	52	HTGVMVGMGQK											Mascot
		1160.56	1160.5		-0.0557	-48	42	52	HTGVMVGMGQK					Oxidation (M)[5]						Mascot
		1198.71	1198.65		-0.0587	-49	31	41	AVFPSIVGRPR											Mascot
		1338.63	1338.6		-0.0305	-23	53	64	DAYVGDEAQSKR											Mascot
		1445.67	1445.59		-0.071	-49	362	374	GEYDESGPSIVHR			66	99.963							Mascot
		1445.67	1445.59		-0.071	-49	362	374	GEYDESGPSIVHR											Mascot
		1515.75	1515.67		-0.0799	-53	87	97	IWHHTFYNELR			61	99.887							Mascot
		1515.75	1515.67		-0.0799	-53	87	97	IWHHTFYNELR											Mascot
		1747.89	1747.79		-0.0969	-55	241	256	SYELPDGQVITIGAER			109	100							Mascot
		1747.89	1747.79		-0.0969	-55	241	256	SYELPDGQVITIGAER											Mascot
		1932.88	1932.77		-0.1118	-58	71	86	YPIEHGIVSNWDDMEK											Mascot
		1948.87	1948.76		-0.1107	-57	71	86	YPIEHGIVSNWDDMEK					Oxidation (M)[14]						Mascot
		1954.06	1953.95		-0.1163	-60	98	115	VAPEEHPVLLTEAPLNPK											Mascot
		2182.97	2182.95		-0.013	-6	1	20	MAETEDIQPLVCDNGTG					Oxidation (M)[1,18]						Mascot
									MVK
		2199.08	2198.95		-0.1214	-55	294	314	DLYGNIVLSGGSTMFPGI					Oxidation (M)[14]						Mascot
									ADR
		3151.64	3151.42		-0.2222	-71	150	179	TTGIVLDSGDGVSHTVPI											Mascot
									YEGYALPHAILR
	2	actin 6 [Populus trichocarpa]										gi|224117708		40592.4	5.05	15	375		100	258	100
		Peptide Information
		Calc. Mass		Obsrv. Mass	± da	± ppm	Start	End	Sequence			Ion	C. I. %	Modification					Rank	Result Type
							Seq.	Seq.				Score
		895.536	895.487		-0.0491	-55	321	328	VVAPPERK											Mascot
		906.46	906.416		-0.0438	-48	176	183	DLTDALMK											Mascot
		992.443	992.466		0.0229	23	21	30	AGFAGDDSPR											Mascot
		1132.53	1132.47		-0.0586	-52	189	198	GYSFTTTAER			22	0							Mascot
		1132.53	1132.47		-0.0586	-52	189	198	GYSFTTTAER											Mascot
		1338.63	1338.6		-0.0305	-23	43	54	DAYVGDEAQSKR											Mascot
		1445.67	1445.59		-0.071	-49	352	364	GEYDESGPSIVHR			66	99.963							Mascot
		1445.67	1445.59		-0.071	-49	352	364	GEYDESGPSIVHR											Mascot
		1515.75	1515.67		-0.0799	-53	77	87	IWHHTFYNELR			61	99.887							Mascot
		1515.75	1515.67		-0.0799	-53	77	87	IWHHTFYNELR											Mascot
		1747.89	1747.79		-0.0969	-55	231	246	SYELPDGQVITIGAER			109	100							Mascot
		1747.89	1747.79		-0.0969	-55	231	246	SYELPDGQVITIGAER											Mascot
		1855.93	1855.83		-0.1066	-57	208	223	LAYVALDYEQELETAK											Mascot
		1932.88	1932.77		-0.1118	-58	61	76	YPIEHGIVSNWDDMEK											Mascot
		1948.87	1948.76		-0.1107	-57	61	76	YPIEHGIVSNWDDMEK					Oxidation (M)[14]						Mascot
		1954.06	1953.95		-0.1163	-60	88	105	VAPEEHPVLLTEAPLNPK											Mascot
		2063.96	2064.02		0.0625	30	2	20	ADDEEIQALVCDNGTVMI											Mascot
									K
		2183.08	2182.95		-0.1265	-58	284	304	DLYGNIVLSGGSTMFPGI											Mascot
									ADR
		2199.08	2198.95		-0.1214	-55	284	304	DLYGNIVLSGGSTMFPGI					Oxidation (M)[14]						Mascot
									ADR
		2211	2210.97		-0.0276	-12	1	20	MADDEEIQALVCDNGTV					Oxidation (M)[1]						Mascot
			2210.97																	Mascot
									MIK
		2284.01	2284.03		0.0183	8	1	20	MADDEEIQALVCDNGTV					Carbamidomethyl (C)[12], Oxidation (M)[1,18]						Mascot
									MIK
		3151.51	3151.42		-0.095	-30	249	276	CPEVLFQPSLIGMEAPGI					Carbamidomethyl (C)[1], Oxidation (M)[13]						Mascot
									HETTYSSIMK
	3	stem cambial region actin protein [Eucommia ulmoides]										gi|55820068		41719.9	5.31	15	371		100	258	100
		Peptide Information
		Calc. Mass		Obsrv. Mass	± da	± ppm	Start	End	Sequence			Ion	C. I. %	Modification					Rank	Result Type
							Seq.	Seq.				Score
		890.476	890.459		-0.0175	-20	209	215	EIVRDMK											Mascot
		895.536	895.487		-0.0491	-55	331	338	VVAPPERK											Mascot
		906.46	906.416		-0.0438	-48	186	193	DLTDALMK											Mascot
		976.448	976.401		-0.0475	-49	21	30	AGFAGDDAPR											Mascot
		1132.53	1132.47		-0.0586	-52	199	208	GYSFTTTAER			22	0							Mascot
		1132.53	1132.47		-0.0586	-52	199	208	GYSFTTTAER											Mascot
		1144.56	1144.5		-0.0595	-52	42	52	HTGVMVGMGQK											Mascot
		1160.56	1160.5		-0.0557	-48	42	52	HTGVMVGMGQK					Oxidation (M)[5]						Mascot
		1198.71	1198.65		-0.0587	-49	31	41	AVFPSIVGRPR											Mascot
		1338.63	1338.6		-0.0305	-23	53	64	DAYVGDEAQSKR											Mascot
		1445.67	1445.59		-0.071	-49	362	374	GEYDESGPSIVHR			66	99.963							Mascot
		1445.67	1445.59		-0.071	-49	362	374	GEYDESGPSIVHR											Mascot
		1515.75	1515.67		-0.0799	-53	87	97	IWHHTFYNELR			61	99.887							Mascot
		1515.75	1515.67		-0.0799	-53	87	97	IWHHTFYNELR											Mascot
		1747.89	1747.79		-0.0969	-55	241	256	SYELPDGQVITIGAER			109	100							Mascot
		1747.89	1747.79		-0.0969	-55	241	256	SYELPDGQVITIGAER											Mascot
		1932.88	1932.77		-0.1118	-58	71	86	YPIEHGIVSNWDDMEK											Mascot
		1948.87	1948.76		-0.1107	-57	71	86	YPIEHGIVSNWDDMEK					Oxidation (M)[14]						Mascot
		1954.06	1953.95		-0.1163	-60	98	115	VAPEEHPVLLTEAPLNPK											Mascot
		2197.1	2196.97		-0.1289	-59	294	314	DLYGNIVLSGGSTMFPGI											Mascot
									AER
		3151.64	3151.42		-0.2222	-71	150	179	TTGIVLDSGDGVSHTVPI											Mascot
									YEGYALPHAILR
	4	RecName: Full=Actin-100										gi|231504		39527.9	5.56	13	330		100	236	100
		Peptide Information
		Calc. Mass		Obsrv. Mass	± da	± ppm	Start	End	Sequence			Ion	C. I. %	Modification					Rank	Result Type
							Seq.	Seq.				Score
		890.476	890.459		-0.0175	-20	189	195	EIVRDMK											Mascot
		895.536	895.487		-0.0491	-55	311	318	VVAPPERK											Mascot
		906.471	906.416		-0.055	-61	189	195	EIVRDMK					Oxidation (M)[6]						Mascot
			906.416																	Mascot
		976.448	976.401		-0.0475	-49	1	10	AGFAGDDAPR											Mascot
		1144.56	1144.5		-0.0595	-52	22	32	HTGVMVGMGQK											Mascot
		1160.56	1160.5		-0.0557	-48	22	32	HTGVMVGMGQK					Oxidation (M)[5]						Mascot
		1198.71	1198.65		-0.0587	-49	11	21	AVFPSIVGRPR											Mascot
		1338.63	1338.6		-0.0305	-23	33	44	DAYVGDEAQSKR											Mascot
		1445.67	1445.59		-0.071	-49	342	354	GEYDESGPSIVHR			66	99.963							Mascot
		1445.67	1445.59		-0.071	-49	342	354	GEYDESGPSIVHR											Mascot
		1515.75	1515.67		-0.0799	-53	67	77	IWHHTFYNELR			61	99.887							Mascot
		1515.75	1515.67		-0.0799	-53	67	77	IWHHTFYNELR											Mascot
		1747.89	1747.79		-0.0969	-55	221	236	SYELPDGQVITIGAER			109	100							Mascot
		1747.89	1747.79		-0.0969	-55	221	236	SYELPDGQVITIGAER											Mascot
		1855.93	1855.83		-0.1066	-57	198	213	LAYVALDYEQELETAK											Mascot
		1932.88	1932.77		-0.1118	-58	51	66	YPIEHGIVSNWDDMEK											Mascot
		1948.87	1948.76		-0.1107	-57	51	66	YPIEHGIVSNWDDMEK					Oxidation (M)[14]						Mascot
		2197.1	2196.97		-0.1289	-59	274	294	DLYGNIVLSGGTTMFPGI											Mascot
									ADR
		3151.64	3151.42		-0.2222	-71	130	159	TTGIVLDSGDGVSHTVPI											Mascot
									YEGYALPHAILR
	5	RecName: Full=Actin-101										gi|231505		41616.9	5.23	13	326		100	236	100
		Peptide Information
		Calc. Mass		Obsrv. Mass	± da	± ppm	Start	End	Sequence			Ion	C. I. %	Modification					Rank	Result Type
							Seq.	Seq.				Score
		890.476	890.459		-0.0175	-20	209	215	EIVRDMK											Mascot
		895.536	895.487		-0.0491	-55	331	338	VVAPPERK											Mascot
		906.471	906.416		-0.055	-61	209	215	EIVRDMK					Oxidation (M)[6]						Mascot
		976.448	976.401		-0.0475	-49	21	30	AGFAGDDAPR											Mascot
		1144.56	1144.5		-0.0595	-52	42	52	HTGVMVGMGQK											Mascot
		1160.56	1160.5		-0.0557	-48	42	52	HTGVMVGMGQK					Oxidation (M)[5]						Mascot
		1198.71	1198.65		-0.0587	-49	31	41	AVFPSIVGRPR											Mascot
		1338.63	1338.6		-0.0305	-23	53	64	DAYVGDEAQSKR											Mascot
		1445.67	1445.59		-0.071	-49	362	374	GEYDESGPSIVHR			66	99.963							Mascot
		1445.67	1445.59		-0.071	-49	362	374	GEYDESGPSIVHR											Mascot
		1515.75	1515.67		-0.0799	-53	87	97	IWHHTFYNELR			61	99.887							Mascot
		1515.75	1515.67		-0.0799	-53	87	97	IWHHTFYNELR											Mascot
		1747.89	1747.79		-0.0969	-55	241	256	SYELPDGQVITIGAER			109	100							Mascot
		1747.89	1747.79		-0.0969	-55	241	256	SYELPDGQVITIGAER											Mascot
		1855.93	1855.83		-0.1066	-57	218	233	LAYVALDYEQELETAK											Mascot
		1932.88	1932.77		-0.1118	-58	71	86	YPIEHGIVSNWDDMEK											Mascot
		1948.87	1948.76		-0.1107	-57	71	86	YPIEHGIVSNWDDMEK					Oxidation (M)[14]						Mascot
		2196.95	2196.97		0.021	10	1	20	MADAEDIEPLVCDNGTG					Carbamidomethyl (C)[12], Oxidation (M)[1,18]						Mascot
									MVK
		3151.64	3151.42		-0.2222	-71	150	179	TTGIVLDSGDGVSHTVPI											Mascot
									YEGYALPHAILR
	6	PREDICTED: hypothetical protein [Vitis vinifera]										gi|225448323		41565.9	5.31	16	317		100	192	100
		Peptide Information
		Calc. Mass		Obsrv. Mass	± da	± ppm	Start	End	Sequence			Ion	C. I. %	Modification					Rank	Result Type
							Seq.	Seq.				Score
		890.476	890.459		-0.0175	-20	209	215	EIVRDMK											Mascot
		895.536	895.487		-0.0491	-55	331	338	VVAPPERK											Mascot
		906.46	906.416		-0.0438	-48	186	193	DLTDALMK											Mascot
		976.448	976.401		-0.0475	-49	21	30	AGFAGDDAPR											Mascot
		1132.53	1132.47		-0.0586	-52	199	208	GYSFTTTAER			22	0							Mascot
		1132.53	1132.47		-0.0586	-52	199	208	GYSFTTTAER											Mascot
		1144.56	1144.5		-0.0595	-52	42	52	HTGVMVGMGQK											Mascot
		1160.56	1160.5		-0.0557	-48	42	52	HTGVMVGMGQK					Oxidation (M)[5]						Mascot
		1198.71	1198.65		-0.0587	-49	31	41	AVFPSIVGRPR											Mascot
		1338.63	1338.6		-0.0305	-23	53	64	DAYVGDEAQSKR											Mascot
		1429.67	1429.6		-0.0719	-50	362	374	GEYDESGPAIVHR											Mascot
		1515.75	1515.67		-0.0799	-53	87	97	IWHHTFYNELR			61	99.887							Mascot
		1515.75	1515.67		-0.0799	-53	87	97	IWHHTFYNELR											Mascot
		1747.89	1747.79		-0.0969	-55	241	256	SYELPDGQVITIGAER			109	100							Mascot
		1747.89	1747.79		-0.0969	-55	241	256	SYELPDGQVITIGAER											Mascot
		1855.93	1855.83		-0.1066	-57	218	233	LAYVALDYEQELETAK											Mascot
		1932.88	1932.77		-0.1118	-58	71	86	YPIEHGIVSNWDDMEK											Mascot
		1948.87	1948.76		-0.1107	-57	71	86	YPIEHGIVSNWDDMEK					Oxidation (M)[14]						Mascot
		1954.06	1953.95		-0.1163	-60	98	115	VAPEEHPVLLTEAPLNPK											Mascot
		2183.08	2182.95		-0.1265	-58	294	314	DLYGNIVLSGGSTMFPGI											Mascot
									ADR
		2199.08	2198.95		-0.1214	-55	294	314	DLYGNIVLSGGSTMFPGI					Oxidation (M)[14]						Mascot
									ADR
		3151.64	3151.42		-0.2222	-71	150	179	TTGIVLDSGDGVSHTVPI											Mascot
									YEGYALPHAILR
	7	Os03g0836000 [Oryza sativa (japonica cultivar-group)]										gi|115456443		41679	5.31	10	316		100	258	100
		Peptide Information
		Calc. Mass		Obsrv. Mass	± da	± ppm	Start	End	Sequence			Ion	C. I. %	Modification					Rank	Result Type
							Seq.	Seq.				Score
		895.536	895.487		-0.0491	-55	331	338	VVAPPERK											Mascot
		976.448	976.401		-0.0475	-49	21	30	AGFAGDDAPR											Mascot
		1132.53	1132.47		-0.0586	-52	199	208	GYSFTTTAER			22	0							Mascot
		1132.53	1132.47		-0.0586	-52	199	208	GYSFTTTAER											Mascot
		1144.56	1144.5		-0.0595	-52	42	52	HTGVMVGMGQK											Mascot
		1160.56	1160.5		-0.0557	-48	42	52	HTGVMVGMGQK					Oxidation (M)[5]						Mascot
		1198.71	1198.65		-0.0587	-49	31	41	AVFPSIVGRPR											Mascot
		1338.63	1338.6		-0.0305	-23	53	64	DAYVGDEAQSKR											Mascot
		1445.67	1445.59		-0.071	-49	362	374	GEYDESGPSIVHR			66	99.963							Mascot
		1445.67	1445.59		-0.071	-49	362	374	GEYDESGPSIVHR											Mascot
		1515.75	1515.67		-0.0799	-53	87	97	IWHHTFYNELR			61	99.887							Mascot
		1515.75	1515.67		-0.0799	-53	87	97	IWHHTFYNELR											Mascot
		1747.89	1747.79		-0.0969	-55	241	256	SYELPDGQVITIGAER			109	100							Mascot
		1747.89	1747.79		-0.0969	-55	241	256	SYELPDGQVITIGAER											Mascot
		2197.1	2196.97		-0.1289	-59	294	314	DLYGNIVLSGGTTMFPGI											Mascot
									ADR
	8	actin 2 [Podocarpus macrophyllus]										gi|2253219		36999.8	5.36	14	301		100	192	100
		Peptide Information
		Calc. Mass		Obsrv. Mass	± da	± ppm	Start	End	Sequence			Ion	C. I. %	Modification					Rank	Result Type
							Seq.	Seq.				Score
		895.536	895.487		-0.0491	-55	311	318	VVAPPERK											Mascot
		906.46	906.416		-0.0438	-48	166	173	DLTDALMK											Mascot
		976.448	976.401		-0.0475	-49	1	10	AGFAGDDAPR											Mascot
		1132.53	1132.47		-0.0586	-52	179	188	GYSFTTTAER			22	0							Mascot
		1132.53	1132.47		-0.0586	-52	179	188	GYSFTTTAER											Mascot
		1144.56	1144.5		-0.0595	-52	22	32	HTGVMVGMGQK											Mascot
		1160.56	1160.5		-0.0557	-48	22	32	HTGVMVGMGQK					Oxidation (M)[5]						Mascot
		1198.71	1198.65		-0.0587	-49	11	21	AVFPSIVGRPR											Mascot
		1338.63	1338.6		-0.0305	-23	33	44	DAYVGDEAQSKR											Mascot
		1515.75	1515.67		-0.0799	-53	67	77	IWHHTFYNELR			61	99.887							Mascot
		1515.75	1515.67		-0.0799	-53	67	77	IWHHTFYNELR											Mascot
		1747.89	1747.79		-0.0969	-55	221	236	SYELPDGQVITIGAER			109	100							Mascot
		1747.89	1747.79		-0.0969	-55	221	236	SYELPDGQVITIGAER											Mascot
		1855.93	1855.83		-0.1066	-57	198	213	LAYVALDYEQELETAK											Mascot
		1932.88	1932.77		-0.1118	-58	51	66	YPIEHGIVSNWDDMEK											Mascot
		1948.87	1948.76		-0.1107	-57	51	66	YPIEHGIVSNWDDMEK					Oxidation (M)[14]						Mascot
		1954.06	1953.95		-0.1163	-60	78	95	VAPEEHPVLLTEAPLNPK											Mascot
			1953.95																	Mascot
		2183.08	2182.95		-0.1265	-58	274	294	DLYGNIVLSGGSTMFPGI											Mascot
									ADR
		2199.08	2198.95		-0.1214	-55	274	294	DLYGNIVLSGGSTMFPGI					Oxidation (M)[14]						Mascot
									ADR
		3151.64	3151.42		-0.2222	-71	130	159	TTGIVLDSGDGVSHTVPI											Mascot
									YEGYALPHAILR
	9	actin [Magnolia denudata]										gi|9408605		41564.9	5.56	14	296		100	192	100
		Peptide Information
		Calc. Mass		Obsrv. Mass	± da	± ppm	Start	End	Sequence			Ion	C. I. %	Modification					Rank	Result Type
							Seq.	Seq.				Score
		890.476	890.459		-0.0175	-20	209	215	EIVRDMK											Mascot
		895.536	895.487		-0.0491	-55	331	338	VVAPPERK											Mascot
		906.471	906.416		-0.055	-61	209	215	EIVRDMK					Oxidation (M)[6]						Mascot
		1132.53	1132.47		-0.0586	-52	199	208	GYSFTTTAER			22	0							Mascot
		1132.53	1132.47		-0.0586	-52	199	208	GYSFTTTAER											Mascot
		1144.56	1144.5		-0.0595	-52	42	52	HTGVMVGMGQK											Mascot
		1160.56	1160.5		-0.0557	-48	42	52	HTGVMVGMGQK					Oxidation (M)[5]						Mascot
		1198.71	1198.65		-0.0587	-49	31	41	AVSPIFVGRPR											Mascot
		1338.63	1338.6		-0.0305	-23	53	64	DAYVGDEAQSKR											Mascot
		1515.75	1515.67		-0.0799	-53	87	97	IWHHTFYNELR			61	99.887							Mascot
		1515.75	1515.67		-0.0799	-53	87	97	IWHHTFYNELR											Mascot
		1747.89	1747.79		-0.0969	-55	241	256	SYELPDGQVITIGAER			109	100							Mascot
		1747.89	1747.79		-0.0969	-55	241	256	SYELPDGQVITIGAER											Mascot
		1855.93	1855.83		-0.1066	-57	218	233	LAYVALDYEQELETAK											Mascot
		1932.88	1932.77		-0.1118	-58	71	86	YPIEHGIVSNWDDMEK											Mascot
		1948.87	1948.76		-0.1107	-57	71	86	YPIEHGIVSNWDDMEK					Oxidation (M)[14]						Mascot
		1954.06	1953.95		-0.1163	-60	98	115	VAPEEHPVLLTEAPLNPK											Mascot
		2183.08	2182.95		-0.1265	-58	294	314	DLYGNIVLSGGSTMFPGI											Mascot
									ADR
		2199.08	2198.95		-0.1214	-55	294	314	DLYGNIVLSGGSTMFPGI					Oxidation (M)[14]						Mascot
									ADR
		2283.25	2283.04		-0.2173	-95	21	41	AGLAPYVCPRAVSPIFVG					Carbamidomethyl (C)[8]						Mascot
									RPR
		3151.64	3151.42		-0.2222	-71	150	179	TTGIVLDSGDGVSHTVPI											Mascot
									YEGYALPHAILR
	10	actin [Setaria italica]										gi|9965319		41655.9	5.31	14	295		100	192	100
		Peptide Information
		Calc. Mass		Obsrv. Mass	± da	± ppm	Start	End	Sequence			Ion	C. I. %	Modification					Rank	Result Type
							Seq.	Seq.				Score
		895.536	895.487		-0.0491	-55	331	338	VVAPPERK											Mascot
		976.448	976.401		-0.0475	-49	21	30	AGFAGDDAPR											Mascot
		1132.53	1132.47		-0.0586	-52	199	208	GYSFTTTAER			22	0							Mascot
		1132.53	1132.47		-0.0586	-52	199	208	GYSFTTTAER											Mascot
		1144.56	1144.5		-0.0595	-52	42	52	HTGVMVGMGQK											Mascot
		1160.56	1160.5		-0.0557	-48	42	52	HTGVMVGMGQK					Oxidation (M)[5]						Mascot
		1198.71	1198.65		-0.0587	-49	31	41	AVFPSIVGRPR											Mascot
		1338.63	1338.6		-0.0305	-23	53	64	DAYVGDEAQSKR											Mascot
		1429.67	1429.6		-0.0719	-50	362	374	GEYDESGPAIVHR											Mascot
		1515.75	1515.67		-0.0799	-53	87	97	IWHHTFYNELR			61	99.729							Mascot
		1515.75	1515.67		-0.0799	-53	87	97	IWHHTFYNELR											Mascot
		1747.89	1747.79		-0.0969	-55	241	256	SYELPDGQVITIGAER			109	100							Mascot
		1747.89	1747.79		-0.0969	-55	241	256	SYELPDGQVITIGAER											Mascot
		1855.93	1855.83		-0.1066	-57	218	233	LAYVALDYEQELETAK											Mascot
		1932.88	1932.77		-0.1118	-58	71	86	YPIEHGIVSNWDDMEK											Mascot
		1948.87	1948.76		-0.1107	-57	71	86	YPIEHGIVSNWDDMEK					Oxidation (M)[14]						Mascot
		1954.06	1953.95		-0.1163	-60	98	115	VAPEEHPVLLTEAPLNPK											Mascot
		2183.08	2182.95		-0.1265	-58	294	314	DLYGNIVLSGGSTMFPGI											Mascot
									ADR
		2199.08	2198.95		-0.1214	-55	294	314	DLYGNIVLSGGSTMFPGI					Oxidation (M)[14]						Mascot
									ADR
		3151.64	3151.42		-0.2222	-71	150	179	TTGIVLDSGDGVSHTVPI											Mascot
									YEGYALPHAILR
Gel Idx/Pos			Spot #26						Instr./Gel Origin		AB4700/091116A					Process Status		Analysis Succeeded
Plate [#] Name			[1] 8912						Instrument Sample Name							Spectra		6
Rank		Protein Name						Species				Accession No.		Protein MW	Protein	Pep.		Protein	Protein	Total Ion	Total Ion
															PI	Count		Score	Score	Score	C. I. %
																			C. I. %
	1	glyceraldehyde 3-phosphate dehydrogenase [Elaeis										gi|82400215		32135.5	7.05	7	191		100	122	100
		guineensis]
		Peptide Information
		Calc. Mass		Obsrv. Mass	± da	± ppm	Start	End	Sequence			Ion	C. I. %	Modification					Rank	Result Type
							Seq.	Seq.				Score
		919.536	919.494		-0.0417	-45	33	40	QVTVFGIR											Mascot
		1089.55	1089.51		-0.047	-43	220	229	AAIKEESEGR											Mascot
		1184.64	1184.59		-0.0503	-42	259	269	AGIALNDHFVK											Mascot
		1434.76	1434.69		-0.0735	-51	161	175	AASFNIIPSSTGAAK											Mascot
		1498.85	1498.77		-0.0781	-52	195	208	VPTVDVSVVDLTVR			24	0							Mascot
		1498.85	1498.77		-0.0781	-52	195	208	VPTVDVSVVDLTVR											Mascot
		1763.75	1763.66		-0.0888	-50	270	283	MVAWYDNEWGYSSR											Mascot
			1763.66																	Mascot
		1779.74	1779.69		-0.0557	-31	270	283	MVAWYDNEWGYSSR					Oxidation (M)[1]						Mascot
		1779.74	1779.69		-0.0557	-31	270	283	MVAWYDNEWGYSSR			99	100	Oxidation (M)[1]						Mascot
		2211.03	2210.98		-0.0437	-20	102	122	SDIDIVSNASCTTNCLADL					Carbamidomethyl (C)[11]						Mascot
									AK
	2	glyceraldehyde-3-phosphate dehydrogenase [Musa										gi|56069874		35974.6	6.22	5	124		100	84	99.999
		acuminata]
		Peptide Information
		Calc. Mass		Obsrv. Mass	± da	± ppm	Start	End	Sequence			Ion	C. I. %	Modification					Rank	Result Type
							Seq.	Seq.				Score
		919.473	919.494		0.0212	23	264	271	EESEGKLK											Mascot
		920.52	920.48		-0.0396	-43	73	80	EVTVFGIR			60	99.677							Mascot
		920.52	920.48		-0.0396	-43	73	80	EVTVFGIR											Mascot
		942.598	942.505		-0.0928	-98	118	126	KVIISAPSK											Mascot
		1434.76	1434.69		-0.0735	-51	201	215	AASFNIIPSSTGAAK											Mascot
		1498.85	1498.77		-0.0781	-52	235	248	VPTVDVSVVDLTVR			24	0							Mascot
		1498.85	1498.77		-0.0781	-52	235	248	VPTVDVSVVDLTVR											Mascot
	3	glyceraldehyde-3-phosphate dehydrogenase [Panax										gi|75859953		22289.7	8.46	4	109		100	73	99.98
		notoginseng]
		Peptide Information
		Calc. Mass		Obsrv. Mass	± da	± ppm	Start	End	Sequence			Ion	C. I. %	Modification					Rank	Result Type
							Seq.	Seq.				Score
		919.473	919.494		0.0212	23	155	162	EESEGKLK											Mascot
		1175.64	1175.59		-0.0549	-47	190	200	AGIALNENFVK											Mascot
		1175.64	1175.59		-0.0549	-47	190	200	AGIALNENFVK			49	95.231							Mascot
		1434.76	1434.69		-0.0735	-51	92	106	AASFNIIPSSTGAAK											Mascot
		1498.85	1498.77		-0.0781	-52	126	139	VPTVDVSVVDLTVR			24	0							Mascot
		1498.85	1498.77		-0.0781	-52	126	139	VPTVDVSVVDLTVR											Mascot
	4	glyceraldehyde-3-phosphate dehydrogenase [Panax										gi|34099812		31792.4	6.4	4	103		99.997	73	99.98
		ginseng]
		Peptide Information
		Calc. Mass		Obsrv. Mass	± da	± ppm	Start	End	Sequence			Ion	C. I. %	Modification					Rank	Result Type
							Seq.	Seq.				Score
		919.473	919.494		0.0212	23	224	231	EESEGKLK											Mascot
		1175.64	1175.59		-0.0549	-47	259	269	AGIALNENFVK											Mascot
		1175.64	1175.59		-0.0549	-47	259	269	AGIALNENFVK			49	95.231							Mascot
		1434.76	1434.69		-0.0735	-51	161	175	AASFNIIPSSTGAAK											Mascot
			1434.69																	Mascot
		1498.85	1498.77		-0.0781	-52	195	208	VPTVDVSVVDLTVR			24	0							Mascot
		1498.85	1498.77		-0.0781	-52	195	208	VPTVDVSVVDLTVR											Mascot
	5	glyceraldehyde 3-phosphate dehydrogenase 2 [Fragaria										gi|16304129		13954.4	9.19	3	103		99.997	73	99.98
		x ananassa]
		Peptide Information
		Calc. Mass		Obsrv. Mass	± da	± ppm	Start	End	Sequence			Ion	C. I. %	Modification					Rank	Result Type
							Seq.	Seq.				Score
		1175.64	1175.59		-0.0549	-47	120	130	AGIALNENFVK											Mascot
		1175.64	1175.59		-0.0549	-47	120	130	AGIALNENFVK			49	95.231							Mascot
		1434.76	1434.69		-0.0735	-51	22	36	AASFNIIPSSTGAAK											Mascot
		1498.85	1498.77		-0.0781	-52	56	69	VPTVDVSVVDLTVR			24	0							Mascot
		1498.85	1498.77		-0.0781	-52	56	69	VPTVDVSVVDLTVR											Mascot
	6	glyceraldehyde 3-phosphate dehydrogenase, putative										gi|223550350		36816.2	7.1	5	99		99.992	60	99.605
		[Ricinus communis]
		Peptide Information
		Calc. Mass		Obsrv. Mass	± da	± ppm	Start	End	Sequence			Ion	C. I. %	Modification					Rank	Result Type
							Seq.	Seq.				Score
		919.473	919.494		0.0212	23	266	273	EESEGKLK											Mascot
		942.598	942.505		-0.0928	-98	120	128	KVIISAPSK											Mascot
		1175.68	1175.59		-0.0913	-78	301	311	AGIALNDKFVK											Mascot
		1175.68	1175.59		-0.0913	-78	301	311	AGIALNDKFVK			36	5.278							Mascot
		1434.76	1434.69		-0.0735	-51	203	217	AASFNIIPSSTGAAK											Mascot
		1498.85	1498.77		-0.0781	-52	237	250	VPTVDVSVVDLTVR			24	0							Mascot
		1498.85	1498.77		-0.0781	-52	237	250	VPTVDVSVVDLTVR											Mascot
	7	RecName: Full=Glyceraldehyde-3-phosphate										gi|462138		36586.1	6.55	5	99		99.991	60	99.605
		dehydrogenase, cytosolic
		Peptide Information
		Calc. Mass		Obsrv. Mass	± da	± ppm	Start	End	Sequence			Ion	C. I. %	Modification					Rank	Result Type
							Seq.	Seq.				Score
		919.473	919.494		0.0212	23	267	274	EESEGKLK											Mascot
		942.598	942.505		-0.0928	-98	121	129	KVIISAPSK											Mascot
		1175.68	1175.59		-0.0913	-78	302	312	AGIALNDKFVK											Mascot
		1175.68	1175.59		-0.0913	-78	302	312	AGIALNDKFVK			36	5.278							Mascot
		1434.76	1434.69		-0.0735	-51	204	218	AASFNIIPSSTGAAK											Mascot
		1498.85	1498.77		-0.0781	-52	238	251	VPTVDVSVVDLTVR			24	0							Mascot
		1498.85	1498.77		-0.0781	-52	238	251	VPTVDVSVVDLTVR											Mascot
	8	glyceraldehyde 3-phosphate dehydrogenase, putative										gi|223522733		22253.5	6.43	4	96		99.983	60	99.605
		[Ricinus communis]
		Peptide Information
		Calc. Mass		Obsrv. Mass	± da	± ppm	Start	End	Sequence			Ion	C. I. %	Modification					Rank	Result Type
							Seq.	Seq.				Score
		919.473	919.494		0.0212	23	135	142	EESEGKLK											Mascot
		1175.68	1175.59		-0.0913	-78	170	180	AGIALNDKFVK											Mascot
		1175.68	1175.59		-0.0913	-78	170	180	AGIALNDKFVK			36	5.278							Mascot
		1434.76	1434.69		-0.0735	-51	72	86	AASFNIIPSSTGAAK											Mascot
		1498.85	1498.77		-0.0781	-52	106	119	VPTVDVSVVDLTVR			24	0							Mascot
		1498.85	1498.77		-0.0781	-52	106	119	VPTVDVSVVDLTVR											Mascot
	9	glyceraldehyde-3-phosphate dehydrogenase [Oryza										gi|149391505		15867.3	8.44	3	89		99.919	60	99.635
		sativa (indica cultivar-group)]
		Peptide Information
		Calc. Mass		Obsrv. Mass	± da	± ppm	Start	End	Sequence			Ion	C. I. %	Modification					Rank	Result Type
							Seq.	Seq.				Score
		1175.68	1175.59		-0.0913	-78	109	119	AGIALKDNFVK											Mascot
		1175.68	1175.59		-0.0913	-78	109	119	AGIALKDNFVK			36	12.411							Mascot
		1434.76	1434.69		-0.0735	-51	11	25	AASFNIIPSSTGAAK											Mascot
		1498.85	1498.77		-0.0781	-52	45	58	VPTVDVSVVDLTVR			24	0							Mascot
		1498.85	1498.77		-0.0781	-52	45	58	VPTVDVSVVDLTVR											Mascot
	10	RecName: Full=Glyceraldehyde-3-phosphate										gi|462137		36877	6.46	5	83		99.711	44	86.403
		dehydrogenase, cytosolic
		Peptide Information
		Calc. Mass		Obsrv. Mass	± da	± ppm	Start	End	Sequence			Ion	C. I. %	Modification					Rank	Result Type
							Seq.	Seq.				Score
		919.473	919.494		0.0212	23	266	273	EESEGKLK											Mascot
		942.598	942.505		-0.0928	-98	120	128	KVIISAPSK											Mascot
		1175.64	1175.59		-0.0549	-47	301	311	AGIALNDNFIK											Mascot
		1175.64	1175.59		-0.0549	-47	301	311	AGIALNDNFIK			20	0							Mascot
		1434.76	1434.69		-0.0735	-51	203	217	AASFNIIPSSTGAAK											Mascot
		1498.85	1498.77		-0.0781	-52	237	250	VPTVDVSVVDLTVR			24	0							Mascot
		1498.85	1498.77		-0.0781	-52	237	250	VPTVDVSVVDLTVR											Mascot
Gel Idx/Pos			Spot #30						Instr./Gel Origin		AB4700/091116A						Process Status		Analysis Succeeded
Plate [#] Name			[1] 8912						Instrument Sample Name								Spectra		6
Rank		Protein Name						Species				Accession No.			Protein MW	Protein	Pep.		Protein	Protein	Total Ion	Total Ion
																PI	Count		Score	Score	Score	C. I. %
																				C. I. %
	1	VFB2 (VIER F-BOX PROTEINE 2); ubiquitin-protein										gi|18409012			57211.9	8.68	8	65		80.451
		ligase [Arabidopsis thaliana]
		Peptide Information
		Calc. Mass		Obsrv. Mass	± da	± ppm	Start	End	Sequence			Ion	C. I. %		Modification					Rank	Result Type
							Seq.	Seq.				Score
		1045.59	1045.52		-0.0736	-70	504	512	NLVACTLRR												Mascot
		1134.58	1134.57		-0.0165	-15	322	332	IGDQGLMSVAK						Oxidation (M)[7]						Mascot
		1274.69	1274.56		-0.1237	-97	321	332	RIGDQGLMSVAK												Mascot
		1384.64	1384.67		0.0281	20	143	154	EITDLGMESFAR						Oxidation (M)[7]						Mascot
			1384.67																		Mascot
		1384.64	1384.67		0.0281	20	143	154	EITDLGMESFAR						Oxidation (M)[7]						Mascot
		1390.79	1390.62		-0.1772	-127	267	279	LQVTDIGLFGISK												Mascot
		2226.16	2226		-0.167	-75	88	106	SEILPFLPCIFNRFDSVTK												Mascot
		2233.2	2232.96		-0.2431	-109	82	100	LSLDAKSEILPFLPCIFNR						Carbamidomethyl (C)[15]						Mascot
		2233.2	2232.96		-0.2431	-109	82	100	LSLDAKSEILPFLPCIFNR						Carbamidomethyl (C)[15]						Mascot
		2283.18	2283.05		-0.1299	-57	88	106	SEILPFLPCIFNRFDSVTK						Carbamidomethyl (C)[9]						Mascot
		2284.03	2284.05		0.0117	5	162	182	LSCGSCTFGAKGINAMLE						Carbamidomethyl (C)[3,6]						Mascot
									HCK
		2284.03	2284.05		0.0117	5	162	182	LSCGSCTFGAKGINAMLE						Carbamidomethyl (C)[3,6]						Mascot
									HCK
		2300.03	2300.05		0.0166	7	162	182	LSCGSCTFGAKGINAMLE						Carbamidomethyl (C)[3,6], Oxidation (M)[16]						Mascot
									HCK
	2	unnamed protein product [Vitis vinifera]										gi|157358047			48092.2	6.18	6	53		0
		Peptide Information
		Calc. Mass		Obsrv. Mass	± da	± ppm	Start	End	Sequence			Ion	C. I. %		Modification					Rank	Result Type
							Seq.	Seq.				Score
		1013.61	1013.47		-0.1418	-140	387	395	QLIRGGELK												Mascot
		1013.61	1013.47		-0.1418	-140	387	395	QLIRGGELK												Mascot
		1243.61	1243.61		-0.0071	-6	86	96	NAFMAAIAQYK						Oxidation (M)[4]						Mascot
		1243.61	1243.61		-0.0071	-6	86	96	NAFMAAIAQYK						Oxidation (M)[4]						Mascot
		1274.68	1274.56		-0.119	-93	188	198	ESELVEKIAEK												Mascot
		1399.76	1399.7		-0.0546	-39	290	300	YIGREGLWLHR												Mascot
		2211.06	2210.98		-0.0796	-36	210	227	CWLVFYMTGEQVLHELD												Mascot
									K
		2226.2	2226		-0.2034	-91	169	187	WVIKMIAGNYTYLQEVLG												Mascot
									K
		2284.08	2284.05		-0.0317	-14	210	227	CWLVFYMTGEQVLHELD						Carbamidomethyl (C)[1], Oxidation (M)[7]						Mascot
									K
		2284.08	2284.05		-0.0317	-14	210	227	CWLVFYMTGEQVLHELD						Carbamidomethyl (C)[1], Oxidation (M)[7]						Mascot
									K
	3	hypothetical protein CHLREDRAFT_177330										gi|159481440			24136.5	8.33	5	51		0
		[Chlamydomonas reinhardtii]
		Peptide Information
		Calc. Mass		Obsrv. Mass	± da	± ppm	Start	End	Sequence			Ion	C. I. %		Modification					Rank	Result Type
							Seq.	Seq.				Score
		1243.71	1243.61		-0.1024	-82	17	26	LRVLCLHSFR												Mascot
		1243.71	1243.61		-0.1024	-82	17	26	LRVLCLHSFR												Mascot
		1274.64	1274.56		-0.0736	-58	125	135	FCVLFAGMKSR						Oxidation (M)[8]						Mascot
		1399.68	1399.7		0.026	19	150	161	VPCPSLHVYGDR						Carbamidomethyl (C)[3]						Mascot
		2211.24	2210.98		-0.2573	-116	96	116	LEGAVMSSALVALQRSG												Mascot
									LRPR
		2283.25	2283.05		-0.1912	-84	195	216	GPQLAVLRSFLVAAAGD												Mascot
									AEELR
	4	PREDICTED: hypothetical protein [Vitis vinifera]										gi|225453064			49395.7	5.83	6	50		0
		Peptide Information
		Calc. Mass		Obsrv. Mass	± da	± ppm	Start	End	Sequence			Ion	C. I. %		Modification					Rank	Result Type
							Seq.	Seq.				Score
		1013.61	1013.47		-0.1418	-140	399	407	QLIRGGELK												Mascot
		1013.61	1013.47		-0.1418	-140	399	407	QLIRGGELK												Mascot
		1243.61	1243.61		-0.0071	-6	86	96	NAFMAAIAQYK						Oxidation (M)[4]						Mascot
		1243.61	1243.61		-0.0071	-6	86	96	NAFMAAIAQYK						Oxidation (M)[4]						Mascot
		1274.68	1274.56		-0.119	-93	200	210	ESELVEKIAEK												Mascot
		1399.76	1399.7		-0.0546	-39	302	312	YIGREGLWLHR												Mascot
		2211.06	2210.98		-0.0796	-36	222	239	CWLVFYMTGEQVLHELD												Mascot
									K
		2226.2	2226		-0.2034	-91	181	199	WVIKMIAGNYTYLQEVLG												Mascot
									K
		2284.08	2284.05		-0.0317	-14	222	239	CWLVFYMTGEQVLHELD						Carbamidomethyl (C)[1], Oxidation (M)[7]						Mascot
									K
		2284.08	2284.05		-0.0317	-14	222	239	CWLVFYMTGEQVLHELD						Carbamidomethyl (C)[1], Oxidation (M)[7]						Mascot
									K
	5	tubulin, beta chain [Populus trichocarpa]										gi|224074921			49932.7	4.82	6	49		0
		Peptide Information
		Calc. Mass		Obsrv. Mass	± da	± ppm	Start	End	Sequence			Ion	C. I. %		Modification					Rank	Result Type
							Seq.	Seq.				Score
		1243.61	1243.61		-0.0072	-6	381	390	VSEQFTVMFR												Mascot
		1243.61	1243.61		-0.0072	-6	381	390	VSEQFTVMFR												Mascot
		1274.69	1274.56		-0.1204	-94	242	252	FPGQLNSDLRK												Mascot
		1384.7	1384.67		-0.031	-22	163	174	MMLTFSVFPSPK												Mascot
		1384.7	1384.67		-0.031	-22	163	174	MMLTFSVFPSPK												Mascot
		1390.58	1390.62		0.0396	28	298	309	NMMCAADPRHGR						Oxidation (M)[2,3]						Mascot
		1399.72	1399.7		-0.0104	-7	381	391	VSEQFTVMFRR												Mascot
		2283.1	2283.05		-0.0454	-20	63	83	AVLMDLEPGTMDSLRTG						Oxidation (M)[4,11]						Mascot
									PYGK
	6	TNP2-like transposon protein-like [Arabidopsis thaliana]										gi|9294245			90697	7.12	7	46		0
		Peptide Information
		Calc. Mass		Obsrv. Mass	± da	± ppm	Start	End	Sequence			Ion	C. I. %		Modification					Rank	Result Type
							Seq.	Seq.				Score
		882.439	882.541		0.1025	116	676	682	FCSDLLK						Carbamidomethyl (C)[2]						Mascot
		1384.72	1384.67		-0.0462	-33	1	11	MVDKSWVHLNR												Mascot
		1384.72	1384.67		-0.0462	-33	1	11	MVDKSWVHLNR												Mascot
		1399.7	1399.7		0.0074	5	576	586	LCAFFNKLCQR						Carbamidomethyl (C)[2]						Mascot
		2210.99	2210.98		-0.0076	-3	186	202	IHACVNDCCLFRNQFEK						Carbamidomethyl (C)[4,8,9]						Mascot
		2226.02	2226		-0.0217	-10	26	45	YVAAGLGENAMIICPCID						Carbamidomethyl (C)[14,16]						Mascot
									CR
		2233.1	2232.96		-0.1333	-60	453	473	NVAASLVSTMLHCGKSE						Carbamidomethyl (C)[13], Oxidation (M)[10]						Mascot
									DGIK
		2233.1	2232.96		-0.1333	-60	453	473	NVAASLVSTMLHCGKSE						Carbamidomethyl (C)[13], Oxidation (M)[10]						Mascot
									DGIK
		2283.04	2283.05		0.0154	7	26	45	YVAAGLGENAMIICPCID						Carbamidomethyl (C)[14,16,19]						Mascot
									CR
		2284.02	2284.05		0.0305	13	656	675	NTARPEGCIAEAYLAEEC						Carbamidomethyl (C)[8]						Mascot
									MR
		2284.02	2284.05		0.0305	13	656	675	NTARPEGCIAEAYLAEEC						Carbamidomethyl (C)[8]						Mascot
									MR
		2300.01	2300.05		0.0354	15	656	675	NTARPEGCIAEAYLAEEC						Carbamidomethyl (C)[8], Oxidation (M)[19]						Mascot
									MR
	7	predicted protein [Populus trichocarpa]										gi|224065371			28015.3	9.88	5	45		0
		Peptide Information
		Calc. Mass		Obsrv. Mass	± da	± ppm	Start	End	Sequence			Ion	C. I. %		Modification					Rank	Result Type
							Seq.	Seq.				Score
		1045.57	1045.52		-0.0525	-50	64	72	RVGVWLCGR												Mascot
		1243.65	1243.61		-0.0435	-35	123	135	MGFGVGPSLPGPK												Mascot
		1243.65	1243.61		-0.0435	-35	123	135	MGFGVGPSLPGPK												Mascot
		1399.75	1399.7		-0.0468	-33	123	136	MGFGVGPSLPGPKR												Mascot
		2226.21	2226		-0.2146	-96	1	20	MSLGVGPLLSEPKGVWV						Oxidation (M)[1]						Mascot
									WVR
		2284.02	2284.05		0.0225	10	221	240	NPSPCSLGTFTARNDYP						Carbamidomethyl (C)[5,18]						Mascot
									CAR
		2284.02	2284.05		0.0225	10	221	240	NPSPCSLGTFTARNDYP						Carbamidomethyl (C)[5,18]						Mascot
									CAR
	8	thylakoid-bound ascorbate peroxidase [Solanum										gi|220029672			25065.8	9.05	4	45		0
		lycopersicum]
		Peptide Information
		Calc. Mass		Obsrv. Mass	± da	± ppm	Start	End	Sequence			Ion	C. I. %		Modification					Rank	Result Type
							Seq.	Seq.				Score
		884.451	884.523		0.072	81	71	78	FSTFASPK												Mascot
		1134.62	1134.57		-0.0568	-50	60	70	RSLIGTTSSGR												Mascot
		1243.66	1243.61		-0.0548	-44	100	109	TTFCHPILVR						Carbamidomethyl (C)[4]						Mascot
		1243.66	1243.61		-0.0548	-44	100	109	TTFCHPILVR			9	0		Carbamidomethyl (C)[4]						Mascot
		2300.08	2300.05		-0.0385	-17	110	128	LGWHDAGTYNKNIEDWP												Mascot
									QR
	9	hypothetical protein [Oryza sativa Japonica Group]										gi|50252488			12503.1	11.5	3	44		0
		Peptide Information
		Calc. Mass		Obsrv. Mass	± da	± ppm	Start	End	Sequence			Ion	C. I. %		Modification					Rank	Result Type
							Seq.	Seq.				Score
		882.527	882.541		0.0147	17	2	9	ALAARQPR												Mascot
		1013.57	1013.47		-0.099	-98	1	9	MALAARQPR			20	0								Mascot
		1013.57	1013.47		-0.099	-98	1	9	MALAARQPR												Mascot
		1045.54	1045.52		-0.0186	-18	80	89	GGEGLEATRR												Mascot
	10	proteinase inhibitor B - arrowhead										gi|279593			16141.9	5.28	4	44		0
		Peptide Information
		Calc. Mass		Obsrv. Mass	± da	± ppm	Start	End	Sequence			Ion	C. I. %		Modification					Rank	Result Type
							Seq.	Seq.				Score
		1013.48	1013.47		-0.0102	-10	98	106	STEETGVYK												Mascot
		1013.48	1013.47		-0.0102	-10	98	106	STEETGVYK												Mascot
		1384.74	1384.67		-0.0753	-54	77	87	YKFSFLMPVPR												Mascot
		1384.74	1384.67		-0.0753	-54	77	87	YKFSFLMPVPR												Mascot
		1399.77	1399.7		-0.0645	-46	131	143	TLLGIGGEHFTVR												Mascot
		2211.11	2210.98		-0.1272	-58	79	97	FSFLMPVPRICDTAWSVG						Carbamidomethyl (C)[11]						Mascot
									K
Gel Idx/Pos			Spot #32						Instr./Gel Origin		AB4700/091116A					Process Status		Analysis Succeeded
Plate [#] Name			[1] 8912						Instrument Sample Name							Spectra		6
Rank		Protein Name						Species				Accession No.		Protein MW	Protein	Pep.		Protein	Protein	Total Ion	Total Ion
															PI	Count		Score	Score	Score	C. I. %
																			C. I. %
	1	Ran GTPase binding protein, putative [Ricinus										gi|223534074		119713	9.03	12	67		87.946
		communis]
		Peptide Information
		Calc. Mass		Obsrv. Mass	± da	± ppm	Start	End	Sequence			Ion	C. I. %	Modification					Rank	Result Type
							Seq.	Seq.				Score
		1045.51	1045.52		0.0144	14	729	738	MSKPGTHGSK					Oxidation (M)[1]						Mascot
		1049.54	1049.55		0.0127	12	911	920	AMSEKISAGR											Mascot
			1049.55																	Mascot
		1074.5	1074.53		0.0291	27	242	249	FQKDMSFR					Oxidation (M)[5]						Mascot
		1429.6	1429.59		-0.0157	-11	656	669	SISVTDQSSCSGCR											Mascot
		1429.6	1429.59		-0.0157	-11	656	669	SISVTDQSSCSGCR											Mascot
		1549.79	1549.78		-0.01	-6	924	938	GGVELSVSQNTPAYK											Mascot
		1711.84	1711.79		-0.0575	-34	494	509	FNAVGGKLFTWGDGDK											Mascot
		1711.84	1711.79		-0.0575	-34	494	509	FNAVGGKLFTWGDGDK											Mascot
		1941.97	1941.85		-0.1254	-65	250	267	FVTPAYGCTQIGKNDSLK											Mascot
		1972.79	1972.95		0.1622	82	679	695	HNCYNCGLLFCHSCSSK					Carbamidomethyl (C)[3]						Mascot
		2225.13	2225.03		-0.1028	-46	346	365	VNMDVGMPKVVESLDDV											Mascot
									HIK
		2284.11	2284.08		-0.0275	-12	785	805	DQGEHQHHVETVSSLSA											Mascot
									GLPR
		2284.11	2284.08		-0.0275	-12	785	805	DQGEHQHHVETVSSLSA											Mascot
									GLPR
		2362.06	2362.14		0.0811	34	656	676	SISVTDQSSCSGCRMPF					Carbamidomethyl (C)[10,13], Oxidation						Mascot
									GLTR					(M)[15]
		2693.27	2693.16		-0.1084	-40	263	287	NDSLKDVLMWGEGVEG					Oxidation (M)[9,22]						Mascot
									GNIGGMVQR
	2	hypothetical protein [Vitis vinifera]										gi|147768978		24670.1	9.76	3	58		0	37	37.992
		Peptide Information
		Calc. Mass		Obsrv. Mass	± da	± ppm	Start	End	Sequence			Ion	C. I. %	Modification					Rank	Result Type
							Seq.	Seq.				Score
		1084.59	1084.55		-0.0445	-41	27	36	SGHPTFALVR											Mascot
		1429.64	1429.59		-0.0493	-34	108	119	FFPSEFGNDVDR											Mascot
		1429.64	1429.59		-0.0493	-34	108	119	FFPSEFGNDVDR			37	37.992							Mascot
		1539.82	1539.79		-0.0277	-18	163	176	LSQLEATAAFFVSR											Mascot
	3	hypothetical protein OsJ_10888 [Oryza sativa Japonica										gi|222624944		71949.3	8.79	8	58		0
		Group]
		Peptide Information
		Calc. Mass		Obsrv. Mass	± da	± ppm	Start	End	Sequence			Ion	C. I. %	Modification					Rank	Result Type
							Seq.	Seq.				Score
		1045.59	1045.52		-0.0662	-63	96	104	WLARSISGR											Mascot
		1084.52	1084.55		0.0209	19	246	253	DYCPKVFR					Carbamidomethyl (C)[3]						Mascot
		1118.63	1118.53		-0.1029	-92	471	480	IKLGANMLSR					Oxidation (M)[7]						Mascot
		1118.63	1118.53		-0.1029	-92	547	556	IKLGANMLSR					Oxidation (M)[7]						Mascot
		1549.82	1549.78		-0.044	-28	426	438	IMDYSLLVGVHFR											Mascot
		1972.91	1972.95		0.0434	22	285	300	SGSFFYLTNDDRYMIK					Oxidation (M)[14]						Mascot
		2225.1	2225.03		-0.0703	-32	73	92	ELPECVRSSTEGHSALPS					Carbamidomethyl (C)[5]						Mascot
									LR
		2284.14	2284.08		-0.0642	-28	313	331	MLPAYYNHVRAFEDTLVT					Oxidation (M)[1]						Mascot
			2284.08																	Mascot
									K
		2284.14	2284.08		-0.0642	-28	313	331	MLPAYYNHVRAFEDTLVT					Oxidation (M)[1]						Mascot
									K
		2299.11	2299.08		-0.0322	-14	258	277	LFKVDPADYMLSLCGDD					Carbamidomethyl (C)[14]						Mascot
									ALR
	4	isoflavone reductase related protein [Pyrus communis]										gi|3243234		33801.8	6.02	3	56		0	37	37.992
		Peptide Information
		Calc. Mass		Obsrv. Mass	± da	± ppm	Start	End	Sequence			Ion	C. I. %	Modification					Rank	Result Type
							Seq.	Seq.				Score
		1429.64	1429.59		-0.0493	-34	108	119	FFPSEFGNDVDR											Mascot
		1429.64	1429.59		-0.0493	-34	108	119	FFPSEFGNDVDR			37	37.992							Mascot
		2299.27	2299.08		-0.1921	-84	5	26	SQILFIGGTGYIGKFIVEA											Mascot
									SAK
		2362.35	2362.14		-0.2097	-89	251	272	NIQEAAVPLNVILSISHAV											Mascot
									FVK
	5	THUMP domain containing protein [Zea mays]										gi|195620092		43699.9	5.19	6	56		0
		Peptide Information
		Calc. Mass		Obsrv. Mass	± da	± ppm	Start	End	Sequence			Ion	C. I. %	Modification					Rank	Result Type
							Seq.	Seq.				Score
		1711.88	1711.79		-0.0899	-53	321	335	FAVLYEARSNTGIDR			10	0							Mascot
		1711.88	1711.79		-0.0899	-53	321	335	FAVLYEARSNTGIDR											Mascot
		1973.13	1972.95		-0.1742	-88	360	377	TIVVQIAKTICMIGVVER											Mascot
		2239.14	2239.03		-0.1123	-50	32	52	KGAYPLRPGVQGFFITCD											Mascot
									GGR
		2284.1	2284.08		-0.0246	-11	234	253	RLFASLETGCNGCIFIQM					Oxidation (M)[18]						Mascot
									HK
		2284.1	2284.08		-0.0246	-11	235	254	LFASLETGCNGCIFIQMH					Oxidation (M)[17]						Mascot
									KR
		2300.15	2300.07		-0.0766	-33	254	275	RAGDPGPVEIVQNMMSS											Mascot
									AALTR
	6	PREDICTED: hypothetical protein [Vitis vinifera]										gi|225428436		33862.8	6.11	3	56		0	37	37.992
		Peptide Information
		Calc. Mass		Obsrv. Mass	± da	± ppm	Start	End	Sequence			Ion	C. I. %	Modification					Rank	Result Type
							Seq.	Seq.				Score
		1084.59	1084.55		-0.0445	-41	27	36	SGHPTFALVR											Mascot
		1429.64	1429.59		-0.0493	-34	106	117	FFPSEFGNDVDR											Mascot
		1429.64	1429.59		-0.0493	-34	106	117	FFPSEFGNDVDR			37	37.992							Mascot
		2693.27	2693.16		-0.1157	-43	271	294	GDHTNFEIQPSFGVEATE											Mascot
									LYPDVK
	7	phenylcoumaran benzylic ether reductase 4 [Populus										gi|224122240		33573.8	7.07	3	55		0	37	37.992
		trichocarpa]
		Peptide Information
		Calc. Mass		Obsrv. Mass	± da	± ppm	Start	End	Sequence			Ion	C. I. %	Modification					Rank	Result Type
							Seq.	Seq.				Score
		1084.57	1084.55		-0.0293	-27	196	205	AVDDPRAVNK											Mascot
		1429.64	1429.59		-0.0493	-34	109	120	FFPSEFGNDVDR											Mascot
		1429.64	1429.59		-0.0493	-34	109	120	FFPSEFGNDVDR			37	37.992							Mascot
		2233.07	2232.99		-0.0737	-33	109	128	FFPSEFGNDVDRAHAVE											Mascot
									PAK
	8	phenylcoumaran benzylic ether reductase 2 [Populus										gi|224105365		34053	7.78	3	55		0	37	37.992
		trichocarpa]
		Peptide Information
		Calc. Mass		Obsrv. Mass	± da	± ppm	Start	End	Sequence			Ion	C. I. %	Modification					Rank	Result Type
							Seq.	Seq.				Score
		1084.58	1084.55		-0.0332	-31	176	185	VVIWGDGNPK											Mascot
		1429.64	1429.59		-0.0493	-34	108	119	FFPSEFGNDVDR											Mascot
		1429.64	1429.59		-0.0493	-34	108	119	FFPSEFGNDVDR			37	37.992							Mascot
		1711.87	1711.79		-0.0787	-46	186	200	AVFNVENDIGTYTIR											Mascot
		1711.87	1711.79		-0.0787	-46	186	200	AVFNVENDIGTYTIR											Mascot
	9	unknown [Psathyrostachys huashanica]										gi|222538185		5375.5	8.49	5	55		0
		Peptide Information
		Calc. Mass		Obsrv. Mass	± da	± ppm	Start	End	Sequence			Ion	C. I. %	Modification					Rank	Result Type
							Seq.	Seq.				Score
		1234.65	1234.68		0.0279	23	1	12	MGVVASVAIEMK											Mascot
		1273.59	1273.55		-0.0322	-25	13	22	SCNTRWVDHR											Mascot
		1273.59	1273.55		-0.0322	-25	13	22	SCNTRWVDHR											Mascot
		1539.77	1539.79		0.0231	15	23	36	CLVNGAFNVTMINK					Oxidation (M)[11]						Mascot
		1811.88	1811.85		-0.0268	-15	1	17	MGVVASVAIEMKSCNTR					Oxidation (M)[1]						Mascot
		2233.1	2232.99		-0.1069	-48	18	36	WVDHRCLVNGAFNVTMI					Oxidation (M)[16]						Mascot
									NK
	10	hypothetical protein OsI_23400 [Oryza sativa Indica										gi|218198394		48443.6	8.84	7	55		0
		Group]
		Peptide Information
		Calc. Mass		Obsrv. Mass	± da	± ppm	Start	End	Sequence			Ion	C. I. %	Modification					Rank	Result Type
							Seq.	Seq.				Score
		1429.66	1429.59		-0.072	-50	436	448	GSVRMAAGMHPCR					Carbamidomethyl (C)[12]						Mascot
		1429.66	1429.59		-0.072	-50	436	448	GSVRMAAGMHPCR					Carbamidomethyl (C)[12]						Mascot
		1811.93	1811.85		-0.0742	-41	195	213	VDFFVTAAGTGGTLSGV											Mascot
			1811.85																	Mascot
									GR
		1972.9	1972.95		0.0588	30	374	392	GELRQAVVAEGDGDGN											Mascot
									DDR
		2233.01	2232.99		-0.0181	-8	378	399	QAVVAEGDGDGNDDRV											Mascot
									WSSGAK
		2284.16	2284.08		-0.0778	-34	190	213	DTAGKVDFFVTAAGTGG											Mascot
									TLSGVGR
		2284.16	2284.08		-0.0778	-34	190	213	DTAGKVDFFVTAAGTGG											Mascot
									TLSGVGR
		2299.24	2299.08		-0.1663	-72	283	305	EEGLLVGISSGANVAACI					Carbamidomethyl (C)[17]						Mascot
									KIAAR
		2306.26	2306.05		-0.2051	-89	128	148	QMLLRFLGAELILTDPAG											Mascot
									GYK
Gel Idx/Pos			Spot #34						Instr./Gel Origin		AB4700/091116A					Process Status		Analysis Succeeded
Plate [#] Name			[1] 8912						Instrument Sample Name							Spectra		6
Rank		Protein Name						Species				Accession No.		Protein MW	Protein	Pep.		Protein	Protein	Total Ion	Total Ion
															PI	Count		Score	Score	Score	C. I. %
																			C. I. %
	1	predicted protein [Ostreococcus lucimarinus CCE9901]										gi|145345862		14575	4.63	3	66		85.171	46	92.44
		Peptide Information
		Calc. Mass		Obsrv. Mass	± da	± ppm	Start	End	Sequence			Ion	C. I. %	Modification					Rank	Result Type
							Seq.	Seq.				Score
		909.407	909.452		0.0448	49	4	9	MKWCER					Carbamidomethyl (C)[4]						Mascot
		1003.51	1003.48		-0.0222	-22	24	32	DAEVTIEAR											Mascot
		1261.7	1261.65		-0.0501	-40	13	23	VYLTIELPDAK			46	92.44							Mascot
		1261.7	1261.65		-0.0501	-40	13	23	VYLTIELPDAK											Mascot
	2	hypothetical protein [Oryza sativa Japonica Group]										gi|42407348		7766.8	10.96	5	64		75.95
		Peptide Information
		Calc. Mass		Obsrv. Mass	± da	± ppm	Start	End	Sequence			Ion	C. I. %	Modification					Rank	Result Type
							Seq.	Seq.				Score
		951.442	951.474		0.0315	33	1	10	MGGGGTSGRR					Oxidation (M)[1]						Mascot
		1418.62	1418.69		0.0702	49	36	48	WLEEGGEGEEAGR											Mascot
		2089.05	2089.03		-0.0202	-10	50	69	GGVLAGAVDAFWPTSEA											Mascot
									ERR
		2233.04	2232.99		-0.0508	-23	11	34	GAGAEAMVMENGGGPA					Oxidation (M)[7,9]						Mascot
									LAAGASRR
		2233.04	2232.99		-0.0508	-23	10	33	RGAGAEAMVMENGGGP					Oxidation (M)[8,10]						Mascot
									ALAAGASR
	3	conserved hypothetical protein [Ricinus communis]										gi|223524270		25021.2	11.41	7	55		0
		Peptide Information
		Calc. Mass		Obsrv. Mass	± da	± ppm	Start	End	Sequence			Ion	C. I. %	Modification					Rank	Result Type
							Seq.	Seq.				Score
		882.538	882.555		0.0169	19	44	50	ARPVQRR											Mascot
		882.538	882.555		0.0169	19	43	49	RARPVQR											Mascot
		1004.57	1004.55		-0.0209	-21	1	8	MVTLRQTR											Mascot
		1045.55	1045.53		-0.0156	-15	199	208	GVDQIGGMLR											Mascot
		2089.08	2089.03		-0.0539	-26	136	153	HDHKPSAPQQRPPNLPN											Mascot
									R
		2225.06	2225.03		-0.0305	-14	81	101	ADFAAEDELSDGKSTAVT											Mascot
									IER
		2300.19	2300.07		-0.1158	-50	110	128	RLIEDGHPLFHQQSQEPL											Mascot
									R
	4	putative stripe rust resistance protein Yr10/Mla1										gi|22208468		103799	6.66	11	54		0
		[Sorghum bicolor]
		Peptide Information
		Calc. Mass		Obsrv. Mass	± da	± ppm	Start	End	Sequence			Ion	C. I. %	Modification					Rank	Result Type
							Seq.	Seq.				Score
		882.504	882.555		0.0506	57	754	760	LDHEKLK											Mascot
		882.504	882.555		0.0506	57	754	760	LDHEKLK											Mascot
		1004.53	1004.55		0.0156	16	76	83	RQVAMDIR					Oxidation (M)[5]						Mascot
		1847.92	1847.87		-0.0542	-29	134	150	DELIKVLTDDGSQEASK											Mascot
		2049.94	2049.77		-0.1727	-84	865	880	WMMMWCKEIHIDELGK											Mascot
		2089.04	2089.03		-0.0124	-6	383	399	VCLLYLSMFPEDYPITK					Carbamidomethyl (C)[2]						Mascot
		2106.96	2106.79		-0.1689	-80	865	880	WMMMWCKEIHIDELGK					Carbamidomethyl (C)[6]						Mascot
		2122.96	2122.79		-0.1704	-80	865	880	WMMMWCKEIHIDELGK					Carbamidomethyl (C)[6], Oxidation (M)[2]						Mascot
		2211.02	2211.02		-0.0012	-1	271	290	VAEEIGGAYSMKALCHES					Carbamidomethyl (C)[15], Oxidation (M)[11]						Mascot
									SR
		2225.12	2225.03		-0.0976	-44	248	267	MIRCALPDNMGGYVIITTT											Mascot
									R
		2230.1	2230.03		-0.0677	-30	251	270	CALPDNMGGYVIITTTRN					Oxidation (M)[7]						Mascot
									FK
		2256.08	2255.97		-0.1057	-47	603	621	HLMCLCVDQNTRVPNGI					Carbamidomethyl (C)[4,6], Oxidation (M)[3]						Mascot
									GR
		2284.15	2284.08		-0.072	-32	233	250	YCIVIDDIWDISVWKMIR					Oxidation (M)[16]						Mascot
		2284.15	2284.08		-0.072	-32	233	250	YCIVIDDIWDISVWKMIR					Oxidation (M)[16]						Mascot
		2305.09	2305.07		-0.02	-9	400	418	NHLIWMWIAEGFVQCEQ					Oxidation (M)[6]						Mascot
									GK
	5	WD40 repeat protein (ISS) [Ostreococcus tauri]										gi|116059115		114569	5.33	11	54		0
		Peptide Information
		Calc. Mass		Obsrv. Mass	± da	± ppm	Start	End	Sequence			Ion	C. I. %	Modification					Rank	Result Type
							Seq.	Seq.				Score
		1004.48	1004.55		0.0632	63	336	345	VAAMSPDGTR											Mascot
		1045.57	1045.53		-0.0445	-43	485	493	RVTLENGTR											Mascot
		1156.55	1156.61		0.0587	51	993	1002	GDVLADYFEK											Mascot
		1156.55	1156.61		0.0587	51	993	1002	GDVLADYFEK											Mascot
		1164.53	1164.6		0.0702	60	108	117	MNDQGEIVSR					Oxidation (M)[1]						Mascot
		1261.65	1261.65		0.0068	5	18	28	GWGGVRVEVMR					Oxidation (M)[10]						Mascot
		1261.65	1261.65		0.0068	5	18	28	GWGGVRVEVMR					Oxidation (M)[10]						Mascot
		1514.7	1514.67		-0.0228	-15	758	771	YAGSPSDLCAKAMK					Carbamidomethyl (C)[9], Oxidation (M)[13]						Mascot
		1785.93	1785.88		-0.0468	-26	675	689	LLGMEQFTTALRYAR					Oxidation (M)[4]						Mascot
		1847.97	1847.87		-0.0994	-54	976	992	TAQCTDWSLLIATVLGR											Mascot
		2284.29	2284.08		-0.2126	-93	725	745	QSVALLAELPNYLDIIVSV											Mascot
									AR
		2284.29	2284.08		-0.2126	-93	725	745	QSVALLAELPNYLDIIVSV											Mascot
									AR
		2305	2305.07		0.0686	30	98	117	FDTGSVCAMRMNDQGEI					Carbamidomethyl (C)[7], Oxidation (M)[9,11]						Mascot
									VSR
		2306.16	2306.02		-0.1419	-62	374	393	IATEVIDFTWVCPAREVS					Carbamidomethyl (C)[12]						Mascot
									GR
	6	putative stripe rust resistance protein Yr10 [Sorghum										gi|22208504		108386	6.67	11	54		0
		bicolor]
		Peptide Information
		Calc. Mass		Obsrv. Mass	± da	± ppm	Start	End	Sequence			Ion	C. I. %	Modification					Rank	Result Type
							Seq.	Seq.				Score
		882.504	882.555		0.0506	57	796	802	LDHEKLK											Mascot
		882.504	882.555		0.0506	57	796	802	LDHEKLK											Mascot
		1004.53	1004.55		0.0156	16	118	125	RQVAMDIR					Oxidation (M)[5]						Mascot
		1847.92	1847.87		-0.0542	-29	176	192	DELIKVLTDDGSQEASK											Mascot
		2049.94	2049.77		-0.1727	-84	907	922	WMMMWCKEIHIDELGK											Mascot
		2089.04	2089.03		-0.0124	-6	425	441	VCLLYLSMFPEDYPITK					Carbamidomethyl (C)[2]						Mascot
		2106.96	2106.79		-0.1689	-80	907	922	WMMMWCKEIHIDELGK					Carbamidomethyl (C)[6]						Mascot
		2122.96	2122.79		-0.1704	-80	907	922	WMMMWCKEIHIDELGK					Carbamidomethyl (C)[6], Oxidation (M)[2]						Mascot
		2211.02	2211.02		-0.0012	-1	313	332	VAEEIGGAYSMKALCHES					Carbamidomethyl (C)[15], Oxidation (M)[11]						Mascot
									SR
		2225.12	2225.03		-0.0976	-44	290	309	MIRCALPDNMGGYVIITTT											Mascot
									R
		2230.1	2230.03		-0.0677	-30	293	312	CALPDNMGGYVIITTTRN					Oxidation (M)[7]						Mascot
									FK
		2256.08	2255.97		-0.1057	-47	645	663	HLMCLCVDQNTRVPNGI					Carbamidomethyl (C)[4,6], Oxidation (M)[3]						Mascot
									GR
		2284.15	2284.08		-0.072	-32	275	292	YCIVIDDIWDISVWKMIR					Oxidation (M)[16]						Mascot
		2284.15	2284.08		-0.072	-32	275	292	YCIVIDDIWDISVWKMIR					Oxidation (M)[16]						Mascot
		2305.09	2305.07		-0.02	-9	442	460	NHLIWMWIAEGFVQCEQ					Oxidation (M)[6]						Mascot
									GK
	7	unknown [Zea mays]										gi|223944025		12933.8	10.62	5	52		0
		Peptide Information
		Calc. Mass		Obsrv. Mass	± da	± ppm	Start	End	Sequence			Ion	C. I. %	Modification					Rank	Result Type
							Seq.	Seq.				Score
		951.516	951.474		-0.042	-44	88	95	ALPWAHTR											Mascot
		1178.56	1178.58		0.0219	19	63	74	VSASCNIGWGGK											Mascot
		1261.66	1261.65		-0.0071	-6	53	62	RYVTSLMFTK					Oxidation (M)[7]						Mascot
		1261.66	1261.65		-0.0071	-6	53	62	RYVTSLMFTK					Oxidation (M)[7]						Mascot
		1418.79	1418.69		-0.0979	-69	75	87	KHTVVAEALHTGR											Mascot
		2306.13	2306.02		-0.1128	-49	54	74	YVTSLMFTKVSASCNIGW					Carbamidomethyl (C)[14]						Mascot
									GGK
	8	p23 [Dactylis glomerata]										gi|76904112		20167.5	4.28	1	52		0	46	92.44
		Peptide Information
		Calc. Mass		Obsrv. Mass	± da	± ppm	Start	End	Sequence			Ion	C. I. %	Modification					Rank	Result Type
							Seq.	Seq.				Score
		1261.7	1261.65		-0.0501	-40	16	26	VYLTIELPDAK			46	92.44							Mascot
		1261.7	1261.65		-0.0501	-40	16	26	VYLTIELPDAK											Mascot
	9	double-stranded RNA-binding domain (ISS)										gi|116056440		87711.4	5.03	10	52		0
		[Ostreococcus tauri]
		Peptide Information
		Calc. Mass		Obsrv. Mass	± da	± ppm	Start	End	Sequence			Ion	C. I. %	Modification					Rank	Result Type
							Seq.	Seq.				Score
		909.421	909.452		0.0304	33	240	246	FDFNNPR											Mascot
		1156.56	1156.61		0.0515	45	351	361	SYLSGSDRGSK											Mascot
		1156.69	1156.61		-0.0828	-72	399	408	IKSVKPDELK			1	0							Mascot
		1164.62	1164.6		-0.0164	-14	247	256	LTTVMIDEVK					Oxidation (M)[5]						Mascot
		1169.62	1169.59		-0.0277	-24	67	76	HASMLRELGR											Mascot
		1261.74	1261.65		-0.0837	-66	310	320	NVIRIPSPHTK											Mascot
		1261.74	1261.65		-0.0837	-66	310	320	NVIRIPSPHTK											Mascot
		2239.07	2239.04		-0.0307	-14	152	173	MGELHLVAVPDAETVAA					Oxidation (M)[1]						Mascot
									GDGDR
		2255.96	2255.97		0.0185	8	363	381	AETFVCTMANIDYAREM					Oxidation (M)[8,17]						Mascot
									CR
		2300.09	2300.07		-0.0161	-7	636	656	KSAPEEVKPMHSTMDDT											Mascot
									PTAK
		2305.18	2305.07		-0.1094	-47	544	563	LFYPPNTGDLLQPLMEIE					Oxidation (M)[15]						Mascot
									AK
	10	unnamed protein product [Vitis vinifera]										gi|157352186		107294	6.5	10	50		0
		Peptide Information
		Calc. Mass		Obsrv. Mass	± da	± ppm	Start	End	Sequence			Ion	C. I. %	Modification					Rank	Result Type
		Calc. Mass		Obsrv. Mass	± da	± ppm	Seq.	Seq.	Sequence			Score	C. I. %	Modification					Rank	Result Type
		882.487	882.555		0.0684	78	122	128	TRLYVCK											Mascot
		882.487	882.555		0.0684	78	122	128	TRLYVCK											Mascot
		1169.54	1169.59		0.0561	48	762	771	SRSMSFSPDR											Mascot
		1178.62	1178.58		-0.0323	-27	599	608	SEYPSQKIAR											Mascot
		1261.67	1261.65		-0.0209	-17	291	302	KSASSAAEELLR											Mascot
		1261.75	1261.65		-0.0977	-77	176	186	AKALEVVQYIK											Mascot
		1940.87	1940.86		-0.0139	-7	327	343	FDMWPETTAVTVSEDGR											Mascot
		2089.11	2089.03		-0.0852	-41	242	260	LFCILKGQAEPVQADSLT											Mascot
									R
		2122.99	2122.79		-0.1987	-94	609	627	DAENDPHLFSCTFSKGN											Mascot
									LK
		2238.93	2239.04		0.1028	46	401	418	FYSGDCYIFQYSYPGEDK					Carbamidomethyl (C)[6]						Mascot
		2256.19	2255.97		-0.2149	-95	93	113	FLSYFKPCIIPQPGGVAS											Mascot
									GFK
Gel Idx/Pos			Spot #36						Instr./Gel Origin		AB4700/091116A_R						Process Status		Analysis Succeeded
Plate [#] Name			[1] 8912						Instrument Sample Name								Spectra		6
Rank		Protein Name						Species				Accession No.			Protein MW	Protein	Pep.		Protein	Protein	Total Ion	Total Ion
																PI	Count		Score	Score	Score	C. I. %
																				C. I. %
	1	retroelement pol polyprotein-like [Arabidopsis thaliana]										gi|9759493			126284	9.02	15	66		85.171
		Peptide Information
		Calc. Mass		Obsrv. Mass	± da	± ppm	Start	End	Sequence			Ion	C. I. %		Modification					Rank	Result Type
							Seq.	Seq.				Score
		877.492	877.499		0.0068	8	258	265	MVTGIGKR						Oxidation (M)[1]						Mascot
		996.485	996.56		0.075	75	131	139	MKADLATCK						Oxidation (M)[1]						Mascot
		1021.52	1021.5		-0.0154	-15	552	559	LFDLEEQK												Mascot
		1288.53	1288.58		0.0512	40	415	425	SDNGTEFLCMR						Oxidation (M)[10]						Mascot
		1399.82	1399.72		-0.0998	-71	1079	1091	QLADILTKALGEK												Mascot
		1513.84	1513.74		-0.1019	-67	625	638	VNQTFSIVNLPPGK												Mascot
		1513.84	1513.74		-0.1019	-67	625	638	VNQTFSIVNLPPGK												Mascot
		1597.81	1597.86		0.0462	29	1002	1014	AMAFLTQELMWLK						Oxidation (M)[2]						Mascot
		2002	2001.83		-0.1723	-86	488	504	TPSMLLQGKSPYEMLYK						Oxidation (M)[4]						Mascot
		2071.06	2070.99		-0.0664	-32	93	110	MTIDSELLTNISHRDVAR												Mascot
		2095.91	2096.01		0.0918	44	133	151	ADLATCKQEGMTMEGYY												Mascot
									GK
		2100.96	2100.94		-0.0225	-11	167	184	ICASHHMTGNLELLSDMR						Carbamidomethyl (C)[2], Oxidation (M)[7]						Mascot
		2186.97	2187.04		0.065	30	720	737	EEVYMKLPQGFQCDDPS						Carbamidomethyl (C)[13], Oxidation (M)[5]						Mascot
									K
		2211.07	2210.99		-0.0822	-37	360	378	TPSYSGARYFLTIVDDYS												Mascot
									R
		2299.08	2299.09		0.0066	3	701	719	DWHVHQMDVHNAFLHG												Mascot
									DLK
		3744.93	3744.57		-0.3555	-95	465	496	FQSYLPIQFWGECILSAA						Carbamidomethyl (C)[13]						Mascot
									YLINRTPSMLLQGK
	2	unnamed protein product [Vitis vinifera]										gi|157350913			67302.4	7.57	10	58		0
		Peptide Information
		Calc. Mass		Obsrv. Mass	± da	± ppm	Start	End	Sequence			Ion	C. I. %		Modification					Rank	Result Type
							Seq.	Seq.				Score
		996.493	996.56		0.0672	67	176	184	MGDVGFARK						Oxidation (M)[1]						Mascot
		1021.51	1021.5		-0.0089	-9	185	192	LFDKMSHK						Oxidation (M)[5]						Mascot
		1045.52	1045.53		0.01	10	250	257	WAHAYIER												Mascot
		1288.69	1288.58		-0.1121	-87	2	12	VEPCTTLRELK												Mascot
		1492.75	1492.71		-0.0398	-27	1	12	MVEPCTTLRELK						Carbamidomethyl (C)[5], Oxidation (M)[1]						Mascot
		2002.02	2001.83		-0.1874	-94	487	503	SHPRYAEIQVMLGEISR						Oxidation (M)[11]						Mascot
		2095.97	2096.01		0.0363	17	193	211	DPIAWNAMISGYVQCGQ												Mascot
									SR
		2283.11	2283.06		-0.0503	-22	292	313	EKNVYTWSSAIGGLAMN												Mascot
									GAGEK
		2299.1	2299.09		-0.0132	-6	292	313	EKNVYTWSSAIGGLAMN						Oxidation (M)[16]						Mascot
									GAGEK
		2301.09	2301.05		-0.0432	-19	507	526	LSGYVANTNPVFFDIEEE												Mascot
									EK
		2370.14	2370.07		-0.0642	-27	359	378	VYGIEPRLEHYGCMVDLY												Mascot
									GR
	3	LTR retrotransposon like protein [Arabidopsis thaliana]										gi|2961349			126217	9.1	14	58		0
		Peptide Information
		Calc. Mass		Obsrv. Mass	± da	± ppm	Start	End	Sequence			Ion	C. I. %		Modification					Rank	Result Type
							Seq.	Seq.				Score
		877.492	877.499		0.0068	8	258	265	MVTGIGKR						Oxidation (M)[1]						Mascot
		991.532	991.465		-0.0667	-67	119	127	RFSVSNGPK												Mascot
		996.485	996.56		0.075	75	131	139	MKADLATCK						Oxidation (M)[1]						Mascot
		1021.52	1021.5		-0.0154	-15	552	559	LFDLEEQK												Mascot
		1288.53	1288.58		0.0512	40	415	425	SDNGTEFLCMR						Oxidation (M)[10]						Mascot
		1399.82	1399.72		-0.0998	-71	1079	1091	QLADILTKALGEK												Mascot
		1513.84	1513.74		-0.1019	-67	625	638	VNQTFSIVNLPPGK												Mascot
		1513.84	1513.74		-0.1019	-67	625	638	VNQTFSIVNLPPGK												Mascot
		1597.81	1597.86		0.0462	29	1002	1014	AMAFLTQELMWLK						Oxidation (M)[2]						Mascot
		2001.93	2001.83		-0.1002	-50	167	184	ICASHHMTGNLELLSGM						Oxidation (M)[7,17]						Mascot
									R
		2071.06	2070.99		-0.0664	-32	93	110	MTIDSELLTNISHRDVAR												Mascot
		2186.97	2187.04		0.065	30	720	737	EEVYMKLPQGFQCDDPS						Carbamidomethyl (C)[13], Oxidation (M)[5]						Mascot
									K
		2211.07	2210.99		-0.0822	-37	360	378	TPSYSGARYFLTIVDDYS												Mascot
									R
		2299.08	2299.09		0.0066	3	701	719	DWHVHQMDVHNAFLHG												Mascot
									DLK
		3744.93	3744.57		-0.3555	-95	465	496	FQSYLPIQFWGECILSAA						Carbamidomethyl (C)[13]						Mascot
									YLINRTPSMLLQGK
	4	chaperone protein dnaJ 16 [Zea mays]										gi|195629780			49284.8	8.82	9	54		0
		Peptide Information
							Start	End				Ion
		Calc. Mass		Obsrv. Mass	± da	± ppm			Sequence				C. I. %		Modification					Rank	Result Type
							Seq.	Seq.				Score
		905.457	905.479		0.0218	24	41	48	TATDQEIK												Mascot
		914.469	914.534		0.0648	71	189	196	VHSNDKSK												Mascot
		1021.53	1021.5		-0.0235	-23	180	188	QAKMGLVCR						Oxidation (M)[4]						Mascot
		1045.45	1045.53		0.0769	74	63	72	NGDDPVASDR												Mascot
		1104.57	1104.53		-0.0343	-31	31	40	DPYEVLGVGR												Mascot
		1399.71	1399.72		0.0021	2	330	341	EVLAKFTEMTSK						Oxidation (M)[9]						Mascot
		1597.8	1597.86		0.0609	38	357	370	NEIHASYTNNPPLK												Mascot
		2001.72	2001.83		0.1082	54	401	418	DHCMEGCGSDSDNSSE						Carbamidomethyl (C)[3], Oxidation (M)[4]						Mascot
									KK
		2100.79	2100.94		0.1496	71	399	417	VKDHCMEGCGSDSDNS						Carbamidomethyl (C)[5], Oxidation (M)[6]						Mascot
									SEK
	5	hypothetical protein OsJ_15607 [Oryza sativa Japonica										gi|125591121			104075	6.22	12	54		0
		Group]
		Peptide Information
		Calc. Mass		Obsrv. Mass	± da	± ppm	Start	End	Sequence			Ion	C. I. %		Modification					Rank	Result Type
							Seq.	Seq.				Score
		877.525	877.499		-0.0263	-30	908	914	HIPEIRI												Mascot
		991.546	991.465		-0.0806	-81	634	642	YTGVDVLPK												Mascot
		1138.62	1138.66		0.0445	39	833	842	LTTLFLGDMK												Mascot
		1165.63	1165.7		0.0722	62	455	464	LWTAEGFITK												Mascot
		1184.67	1184.63		-0.0331	-28	794	804	LGNDPFPLLAK												Mascot
		1421.67	1421.69		0.0227	16	816	826	KWCCAEEVALR						Carbamidomethyl (C)[3,4]						Mascot
		1848.95	1848.87		-0.0733	-40	333	348	LKPLGDEAAMELFCRR												Mascot
		1848.95	1848.87		-0.0733	-40	333	348	LKPLGDEAAMELFCRR												Mascot
		1864.94	1864.86		-0.08	-43	333	348	LKPLGDEAAMELFCRR						Oxidation (M)[10]						Mascot
		2070.99	2070.99		0.0037	2	466	483	GSSTLEEVADEYLMELIR						Oxidation (M)[14]						Mascot
		2096.12	2096.01		-0.1182	-56	312	330	IIITTRTSDVASLAQDTYK												Mascot
		2101.09	2100.94		-0.1524	-73	558	577	TFVATNGGAESDLLHSLI												Mascot
									QK
		2211.1	2210.99		-0.1069	-48	465	483	RGSSTLEEVADEYLMELI												Mascot
									R
		2370.28	2370.07		-0.2048	-86	556	577	LRTFVATNGGAESDLLHS												Mascot
									LIQK
	6	hypothetical protein OsI_36578 [Oryza sativa Indica										gi|125534862			116944	5.89	13	53		0
		Group]
		Peptide Information
		Calc. Mass		Obsrv. Mass	± da	± ppm	Start	End	Sequence			Ion	C. I. %		Modification					Rank	Result Type
							Seq.	Seq.				Score
		882.468	882.546		0.0781	89	123	129	RSLYDTK												Mascot
		882.468	882.546		0.0781	89	124	130	SLYDTKR												Mascot
		991.499	991.465		-0.0337	-34	131	139	QCASREVAK												Mascot
		996.599	996.56		-0.0386	-39	929	936	FKVQIHPK												Mascot
		1165.63	1165.7		0.0689	59	1013	1022	IPSFCLTKEK												Mascot
		1273.64	1273.57		-0.0753	-59	946	955	NWSNKWVPSR												Mascot
		1492.77	1492.71		-0.0629	-42	1009	1020	FSHRIPSFCLTK						Carbamidomethyl (C)[9]						Mascot
		1597.84	1597.86		0.0133	8	633	646	AYARINHVDPSNLK												Mascot
		2187.09	2187.04		-0.0505	-23	292	312	ESAPAEENAAESSSLQIL												Mascot
									GKR
		2211.04	2210.99		-0.0459	-21	860	878	SHDKFEAGQIWALYSDT												Mascot
									DK
		2299.08	2299.09		0.0078	3	712	731	GEVWALYKGWSMQLSS												Mascot
									DADR
		2301	2301.05		0.0512	22	416	436	DAEETDESIKQYGWAGD												Mascot
									MAGK
		3744.75	3744.57		-0.1775	-47	879	909	FPNFYGWEKLWLEHDVP												Mascot
									VSCGTFEIQNMETK
	7	DNAJ heat shock N-terminal domain-containing protein										gi|15234951			19672.5	4.62	6	52		0
		[Arabidopsis thaliana]
		Peptide Information
		Calc. Mass		Obsrv. Mass	± da	± ppm	Start	End	Sequence			Ion	C. I. %		Modification					Rank	Result Type
							Seq.	Seq.				Score
		1104.58	1104.53		-0.0456	-41	33	42	SAILHSHPDK												Mascot
		1288.65	1288.58		-0.0723	-56	62	72	AWEVLSDAELR												Mascot
		1864.97	1864.86		-0.105	-56	144	161	LGAFVASVVLPCGSCSLK						Carbamidomethyl (C)[12,15]						Mascot
		2096.04	2096.01		-0.0318	-15	2	19	LVGENCVHETYYEILSVK												Mascot
		2284.01	2284.05		0.041	18	114	134	CGDYFCVDSSELGTMGF												Mascot
									ALLR
		2284.1	2284.05		-0.0496	-22	1	19	MLVGENCVHETYYEILSV						Carbamidomethyl (C)[7]						Mascot
									K
	8	ferredoxin-6 [Zea mays]										gi|195609550			17196.5	8.13	6	50		0
		Peptide Information
		Calc. Mass		Obsrv. Mass	± da	± ppm	Start	End	Sequence			Ion	C. I. %		Modification					Rank	Result Type
							Seq.	Seq.				Score
		1184.66	1184.63		-0.0304	-26	48	58	FVRASAAAVHR												Mascot
		1421.68	1421.69		0.0049	3	138	149	ADCVIYTHKESR												Mascot
		1514.73	1514.73		-0.0052	-3	125	137	AEGYVLTCVSYPR						Carbamidomethyl (C)[8]						Mascot
		2070.91	2070.99		0.0862	42	1	22	MATAAAAATAMCSVPGP						Oxidation (M)[1,11]						Mascot
									SGSMR
		2095.97	2096.01		0.0371	18	2	23	ATAAAAATAMCSVPGPS						Oxidation (M)[10,20]						Mascot
									GSMRR
		2211.01	2210.99		-0.0244	-11	1	23	MATAAAAATAMCSVPGP						Oxidation (M)[1]						Mascot
			2210.99																		Mascot
									SGSMRR
		2284.03	2284.05		0.0193	8	1	23	MATAAAAATAMCSVPGP						Carbamidomethyl (C)[12], Oxidation (M)[1,11]						Mascot
									SGSMRR
		2284.03	2284.05		0.0193	8	1	23	MATAAAAATAMCSVPGP						Carbamidomethyl (C)[12], Oxidation (M)[1,11]						Mascot
									SGSMRR
	9	hypothetical protein OsI_02192 [Oryza sativa Indica										gi|125526189			48568.9	5.67	8	50		0
		Group]
		Peptide Information
		Calc. Mass		Obsrv. Mass	± da	± ppm	Start	End	Sequence			Ion	C. I. %		Modification					Rank	Result Type
							Seq.	Seq.				Score
		914.553	914.534		-0.0193	-21	14	21	VLRGVQSR												Mascot
		1184.54	1184.63		0.0924	78	381	388	YCGTWWRR						Carbamidomethyl (C)[2]						Mascot
		1292.6	1292.62		0.0219	17	1	11	MAQLEDMVEAR												Mascot
		1513.66	1513.74		0.0713	47	377	387	DVDRYCGTWWR						Carbamidomethyl (C)[6]						Mascot
		1513.66	1513.74		0.0713	47	377	387	DVDRYCGTWWR						Carbamidomethyl (C)[6]						Mascot
		1514.81	1514.73		-0.088	-58	280	293	GVMEIPTILIDDAK												Mascot
		1597.82	1597.86		0.0385	24	229	243	RTPPPSPPPGSHNTR												Mascot
		2283.22	2283.06		-0.1619	-71	79	101	AGDSTPVPTASALIAEVR												Mascot
									SLEAK
		2299.17	2299.09		-0.0762	-33	47	67	LVSIGPYYHGAAALRAME												Mascot
									DHK
	10	predicted protein [Populus trichocarpa]										gi|224086556			7354.5	5.7	5	49		0
		Peptide Information
		Calc. Mass		Obsrv. Mass	± da	± ppm	Start	End	Sequence			Ion	C. I. %		Modification					Rank	Result Type
							Seq.	Seq.				Score
		1344.58	1344.56		-0.0136	-10	19	28	ADYEKMEEWK						Oxidation (M)[6]						Mascot
		1513.75	1513.74		-0.0179	-12	35	47	EYGISFKGNLEEK												Mascot
		1513.75	1513.74		-0.0179	-12	35	47	EYGISFKGNLEEK												Mascot
		1848.83	1848.87		0.0384	21	1	15	MNPCTGFQMPLHYPR						Carbamidomethyl (C)[4]						Mascot
		1848.83	1848.87		0.0384	21	1	15	MNPCTGFQMPLHYPR						Carbamidomethyl (C)[4]						Mascot
		1864.83	1864.86		0.0317	17	1	15	MNPCTGFQMPLHYPR						Carbamidomethyl (C)[4], Oxidation (M)[1]						Mascot
		2095.98	2096.01		0.021	10	2	18	NPCTGFQMPLHYPRYAK						Carbamidomethyl (C)[3], Oxidation (M)[8]						Mascot
		2211.03	2210.99		-0.0402	-18	1	18	MNPCTGFQMPLHYPRYA						Carbamidomethyl (C)[4]						Mascot
									K
Gel Idx/Pos			Spot #37						Instr./Gel Origin		AB4700/091116A					Process Status		Analysis Succeeded
Plate [#] Name			[1] 8912						Instrument Sample Name							Spectra		6
Rank		Protein Name						Species				Accession No.		Protein MW	Protein	Pep.		Protein	Protein	Total Ion	Total Ion
															PI	Count		Score	Score	Score	C. I. %
																			C. I. %
	1	RecName: Full=Triosephosphate isomerase,										gi|1174745		31613.1	6	7	103		99.997	56	99.426
		chloroplastic; Short=TIM; Short=Triose-phosphate
		isomerase
		Peptide Information
							Start	End				Ion
		Calc. Mass		Obsrv. Mass	± da	± ppm			Sequence				C. I. %	Modification					Rank	Result Type
							Seq.	Seq.				Score
		954.483	954.456		-0.0277	-29	49	56	FFVGGNWK											Mascot
		954.483	954.456		-0.0277	-29	49	56	FFVGGNWK			44	91.117							Mascot
		1078.59	1078.56		-0.0317	-29	156	165	AAYALSQNLK											Mascot
		1303.62	1303.55		-0.0671	-51	182	191	TFDVCFKQMK					Carbamidomethyl (C)[5]						Mascot
		1435.69	1435.71		0.0156	11	166	177	VMACIGELLEER					Carbamidomethyl (C)[4], Oxidation (M)[2]						Mascot
		1548.83	1548.75		-0.0755	-49	266	280	KEDIDGFLVGGASLK											Mascot
		1591.82	1591.78		-0.0403	-25	218	232	VASPEQAQEVHAAVR			12	0							Mascot
[truncated: 4,133 more rows]
